# Supplementary material for: Serum Metabolites Are Associated With HFpEF in Biopsy‐Proven Nonalcoholic Fatty Liver Disease
Source: PubMed Central journal article supplement — J Am Heart Assoc. 2023 Jul 8;12(14):e029873. doi: 10.1161/JAHA.123.029873 (PMC10382080; doi:10.1161/jaha.123.029873), 2023-07-08

# **SUPPLEMENTAL MATERIAL**

## **DATA S1: SUPPLEMENTAL METHODS**

### *Quality Assurance and Control*

Several types of controls were analyzed in concert with the experimental samples. Specifically, a pooled matrix sample generated by taking a small volume of each experimental sample served as a technical replicate throughout the data set. Extracted water samples served as process blanks and a cocktail of quality control (QC) standards chosen not to interfere with the measurement of endogenous compounds were spiked into every analyzed sample to allow for instrument performance monitoring and aided chromatographic alignment. Instrument variability was determined by calculating the median relative standard deviation (RSD) for the standards that were added to each sample prior to injection into the mass spectrometers. Process variability was determined by calculating the median RSD for all endogenous metabolites (*i.e.*, non-instrument standards) present in 100% of the pooled matrix samples. Experimental samples were randomized across the platform run with QC samples spaced evenly among the injections.

**Table S1: TTE vs no TTE**

|                                     | <b>No TTE (N=98)</b> | <b>TTE (N=89)</b> | <b>p-value</b> |
|-------------------------------------|----------------------|-------------------|----------------|
| <b>Age (mean, SD)</b>               | 50.0 (11.4)          | 50.4 (9.4)        | 0.77           |
| <b>Female (n, %)</b>                | 61 (62.2)            | 38 (42.7)         | 0.01           |
| <b>Race (n, %)</b>                  |                      |                   | 0.56           |
| <b>White</b>                        | 84 (85.7)            | 82 (92.1)         |                |
| <b>Black</b>                        | 8 (8.2)              | 4 (4.5)           |                |
| <b>BMI (mean, SD)</b>               | 34.2 (7.3)           | 36.4 (7.0)        | 0.04           |
| <b>Diabetes mellitus (%)</b>        | 35 (35.7)            | 32 (36.0)         | 1              |
| <b>Hemoglobin A1c (mean, SD)</b>    | 6.1 (0.9)            | 6.6 (1.6)         | 0.03           |
| <b>Hypertension</b>                 | 54 (55.1)            | 67 (75.3)         | 0.006          |
| <b>Total cholesterol (mean, SD)</b> | 201.0 (56.2)         | 184.2 (44.9)      | 0.04           |
| <b>LDL (mean, SD)</b>               | 120.0 (34.6)         | 111.3 (39.0)      | 0.15           |
| <b>HDL (mean, SD)</b>               | 42.47 (14.6)         | 37.84 (13.7)      | 0.04           |
| <b>Hyperlipidemia</b>               | 36 (36.7)            | 37 (41.6)         | 0.60           |
| <b>Hypertriglyceridemia</b>         | 18 (18.4)            | 12 (13.5)         | 0.48           |
| <b>AST (mean, SD)</b>               | 70.5 (53.9)          | 64.5 (42.9)       | 0.41           |
| <b>ALT (mean, SD)</b>               | 93.9 (73.2)          | 80.3 (50.3)       | 0.15           |
| <b>Fibrosis stage (n, %)</b>        |                      |                   | 0.07           |
| <b>Stage 0</b>                      | 9 (9.2)              | 3 (3.4)           |                |
| <b>Stage 1</b>                      | 20 (20.4)            | 16 (18.0)         |                |
| <b>Stage 2</b>                      | 51 (52.0)            | 39 (43.8)         |                |
| <b>Stage 3</b>                      | 14 (14.3)            | 27 (30.3)         |                |
| <b>Stage 4</b>                      | 4 (4.1)              | 4 (4.5)           |                |
| <b>NASH Activity Score</b>          |                      |                   | 0.72           |
| <b>1</b>                            | 2 (2.2)              | 1 (1.2)           |                |
| <b>2</b>                            | 11 (12.1)            | 6 (7.1)           |                |
| <b>3</b>                            | 14 (15.4)            | 12 (14.1)         |                |
| <b>4</b>                            | 19 (20.9)            | 27 (31.8)         |                |
| <b>5</b>                            | 23 (25.3)            | 20 (23.5)         |                |
| <b>6</b>                            | 13 (14.3)            | 12 (14.1)         |                |
| <b>7</b>                            | 9 (9.9)              | 7 (8.2)           |                |

TTE = transthoracic echocardiogram; SD = standard deviation; LDL = low-density lipoprotein; HDL = high-density lipoprotein; AST = aspartate aminotransferase; ALT = alanine aminotransferase; NASH = non-alcoholic steatohepatitis

**Table S2: Missing metabolite values by HFpEF definition\***

|                            | HFpEF          |                | HFpEF No Fatigue |                | Diastolic dysfunction |                |
|----------------------------|----------------|----------------|------------------|----------------|-----------------------|----------------|
|                            | No             | Yes            | No               | Yes            | No                    | Yes            |
| Missing values<br>(%, IQR) | 2.4% (1.8-3.2) | 2.6% (1.8-3.0) | 2.4% (1.8-3.2)   | 2.6% (1.8-2.7) | 2.4% (1.8-3.3)        | 2.4% (1.8-3.0) |

\*For entire cohort of 89 patients: 2.4% (IQR: 1.8-3.0)

HFpEF = heart failure with preserved ejection fraction; IQR = interquartile range

**Table S3: HFpEF full results\***

| Metabolite                                        | Pathway    | Sub-Pathway                                      | log Fold change | Unadjusted p-value | Adjusted p-value |
|---------------------------------------------------|------------|--------------------------------------------------|-----------------|--------------------|------------------|
| 1-arachidonoyl-GPE* (20:4)*                       | Lipid      | Lysolipid                                        | 0.28            | 0.0001             | 0.06             |
| 1-docosahexaenoylglycerophosphoethanolamine*      | Lipid      | Lysolipid                                        | 0.37            | 0.0003             | 0.10             |
| 2-stearoylglycerophosphoethanolamine*             | Lipid      | Lysolipid                                        | 0.33            | 0.001              | 0.16             |
| 1-stearoyl-GPE (18:0)                             | Lipid      | Lysolipid                                        | 0.26            | 0.002              | 0.19             |
| 2-arachidonoyl-GPE* (20:4)*                       | Lipid      | Lysolipid                                        | 0.58            | 0.002              | 0.19             |
| 1-arachidonoyl-GPC* (20:4)*                       | Lipid      | Lysolipid                                        | 0.27            | 0.002              | 0.19             |
| azelate (nonanedioate; C9)                        | Lipid      | Fatty Acid, Dicarboxylate                        | -0.31           | 0.003              | 0.19             |
| 2-arachidonoyl-GPC* (20:4)*                       | Lipid      | Lysolipid                                        | 0.32            | 0.003              | 0.19             |
| alpha-ketoglutarate                               | Energy     | TCA Cycle                                        | 0.32            | 0.003              | 0.19             |
| 1-palmitoyl-GPC (16:0)                            | Lipid      | Lysolipid                                        | 0.23            | 0.003              | 0.19             |
| TL18:3n6 (g-linolenic acid)                       | Lipid      | Mole % Total Fatty Acid                          | 0.24            | 0.004              | 0.19             |
| 1-myristoyl-GPC (14:0)                            | Lipid      | Lysolipid                                        | 0.40            | 0.004              | 0.19             |
| 1-oleoyl-GPE (18:1)                               | Lipid      | Lysolipid                                        | 0.24            | 0.004              | 0.19             |
| 2-oleoyl-GPE* (18:1)*                             | Lipid      | Lysolipid                                        | 0.85            | 0.004              | 0.19             |
| 2-palmitoleoyl-GPC* (16:1)*                       | Lipid      | Lysolipid                                        | 0.53            | 0.005              | 0.19             |
| 1-palmitoyl-GPE (16:0)                            | Lipid      | Lysolipid                                        | 0.24            | 0.005              | 0.19             |
| palmitoyl-arachidonoylglycerophosphocholine (2)*  | Lipid      | Lysolipid                                        | 0.17            | 0.005              | 0.19             |
| 2-hydroxy-3-methylvalerate                        | Amino Acid | Leucine, Isoleucine and Valine Metabolism        | 0.27            | 0.006              | 0.19             |
| 2-myristoyl-GPC* (14:0)*                          | Lipid      | Lysolipid                                        | 0.55            | 0.006              | 0.19             |
| 1-oleoyl-GPC (18:1)                               | Lipid      | Lysolipid                                        | 0.28            | 0.006              | 0.19             |
| 1-arachidonoylglycerol                            | Lipid      | Monoacylglycerol                                 | 0.24            | 0.006              | 0.20             |
| 1-linolenoylglycerophosphocholine (18:3n3)*       | Lipid      | Lysolipid                                        | 0.34            | 0.007              | 0.20             |
| citrate                                           | Energy     | TCA Cycle                                        | -0.18           | 0.008              | 0.21             |
| cysteine s-sulfate                                | Amino Acid | Methionine, Cysteine, SAM and Taurine Metabolism | -0.20           | 0.008              | 0.21             |
| 2-docosahexaenoyl-GPC* (22:6)*                    | Lipid      | Lysolipid                                        | 0.40            | 0.008              | 0.21             |
| caproate (6:0)                                    | Lipid      | Medium Chain Fatty Acid                          | -0.16           | 0.009              | 0.22             |
| 2-palmitoyl-GPC* (16:0)*                          | Lipid      | Lysolipid                                        | 0.25            | 0.009              | 0.22             |
| 1-eicosapentaenoylglycerophosphocholine (20:5n3)* | Lipid      | Lysolipid                                        | 0.47            | 0.009              | 0.22             |
| 1-stearoyl-GPC (18:0)                             | Lipid      | Lysolipid                                        | 0.29            | 0.01               | 0.23             |

|                                                     |              |                                                      |       |      |      |
|-----------------------------------------------------|--------------|------------------------------------------------------|-------|------|------|
| <b>glucose</b>                                      | Carbohydrate | Glycolysis, Gluconeogenesis, and Pyruvate Metabolism | 0.14  | 0.01 | 0.25 |
| <b>2-palmitoyl-GPE* (16:0)*</b>                     | Lipid        | Lysolipid                                            | 0.28  | 0.01 | 0.25 |
| <b>1-palmitoleoyl-GPC* (16:1)*</b>                  | Lipid        | Lysolipid                                            | 0.32  | 0.01 | 0.25 |
| <b>N6-acetyllysine</b>                              | Amino Acid   | Lysine Metabolism                                    | 0.12  | 0.01 | 0.27 |
| <b>1-pentadecanoylglycerophosphocholine (15:0)*</b> | Lipid        | Lysolipid                                            | 0.25  | 0.01 | 0.27 |
| <b>methyl glucopyranoside (alpha + beta)</b>        | Xenobiotics  | Food Component/Plant                                 | -0.72 | 0.02 | 0.29 |
| <b>1-docosahexaenoyl-GPC* (22:6)*</b>               | Lipid        | Lysolipid                                            | 0.28  | 0.02 | 0.29 |
| <b>2-eicosatrienoyl-GPC* (20:3)*</b>                | Lipid        | Lysolipid                                            | 0.21  | 0.02 | 0.32 |
| <b>1-docosahexaenoylglycerol</b>                    | Lipid        | Monoacylglycerol                                     | 0.32  | 0.02 | 0.32 |
| <b>1-eicosatrienoylglycerophosphoethanolamine*</b>  | Lipid        | Lysolipid                                            | 0.55  | 0.02 | 0.35 |
| <b>1-eicosatrienoyl-GPC* (20:3)*</b>                | Lipid        | Lysolipid                                            | 0.23  | 0.02 | 0.35 |
| <b>1-docosapentaenoyl-GPC* (22:5n3)*</b>            | Lipid        | Lysolipid                                            | 0.26  | 0.02 | 0.35 |
| <b>ribitol</b>                                      | Carbohydrate | Pentose Metabolism                                   | 0.14  | 0.02 | 0.38 |
| <b>propionylglycine (C3)</b>                        | Lipid        | Fatty Acid Metabolism (also BCAA Metabolism)         | 0.26  | 0.03 | 0.40 |
| <b>phenylpyruvate</b>                               | Amino Acid   | Phenylalanine and Tyrosine Metabolism                | 0.17  | 0.03 | 0.40 |
| <b>1-linolenoylglycerol</b>                         | Lipid        | Monoacylglycerol                                     | 0.25  | 0.03 | 0.41 |
| <b>N2-methylguanosine</b>                           | Nucleotide   | Purine Metabolism, Guanine containing                | 0.22  | 0.03 | 0.44 |
| <b>2-stearoyl-GPC* (18:0)*</b>                      | Lipid        | Lysolipid                                            | 0.29  | 0.03 | 0.44 |
| <b>1-palmitoylplasmylethanolamine*</b>              | Lipid        | Lysolipid                                            | 0.17  | 0.03 | 0.44 |
| <b>eugenol sulfate</b>                              | Xenobiotics  | Food Component/Plant                                 | 0.87  | 0.03 | 0.45 |
| <b>N-acetyltryptophan</b>                           | Amino Acid   | Tryptophan Metabolism                                | 0.23  | 0.04 | 0.46 |
| <b>2-docosahexaenoylglycerol*</b>                   | Lipid        | Monoacylglycerol                                     | 0.69  | 0.04 | 0.48 |
| <b>2-hydroxyisobutyrate</b>                         | Xenobiotics  | Chemical                                             | 0.20  | 0.04 | 0.49 |
| <b>adrenate (22:4n6)</b>                            | Lipid        | Polyunsaturated Fatty Acid (n3 and n6)               | 0.18  | 0.04 | 0.51 |
| <b>benzoate</b>                                     | Xenobiotics  | Benzoate Metabolism                                  | -0.14 | 0.04 | 0.53 |
| <b>S-methylcysteine</b>                             | Amino Acid   | Methionine, Cysteine, SAM and Taurine Metabolism     | -0.20 | 0.04 | 0.53 |
| <b>3-methoxytyrosine</b>                            | Amino Acid   | Phenylalanine and Tyrosine Metabolism                | -0.13 | 0.05 | 0.53 |
| <b>mannose</b>                                      | Carbohydrate | Fructose, Mannose and Galactose Metabolism           | 0.14  | 0.05 | 0.55 |
| <b>methionine sulfone</b>                           | Amino Acid   | Methionine, Cysteine, SAM and Taurine Metabolism     | 0.29  | 0.05 | 0.57 |
| <b>3b-hydroxy-5-cholenoic acid</b>                  | Lipid        | Secondary Bile Acid Metabolism                       | -0.48 | 0.06 | 0.61 |

|                                                              |              |                                                      |       |      |      |
|--------------------------------------------------------------|--------------|------------------------------------------------------|-------|------|------|
| <b>1-stearoylplasménylethanolamine*</b>                      | Lipid        | Lysolipid                                            | 0.22  | 0.06 | 0.61 |
| <b>3-methyl-2-oxobutyrate</b>                                | Amino Acid   | Leucine, Isoleucine and Valine Metabolism            | 0.11  | 0.06 | 0.61 |
| <b>N6-succinyladenosine</b>                                  | Nucleotide   | Purine Metabolism, Adenine containing                | 0.14  | 0.06 | 0.61 |
| <b>2-linoleoyl-GPC* (18:2)*</b>                              | Lipid        | Lysolipid                                            | 0.19  | 0.06 | 0.61 |
| <b>2-arachidonoyl glycerol</b>                               | Lipid        | Monoacylglycerol                                     | 0.20  | 0.06 | 0.61 |
| <b>1-oleoylplasménylethanolamine*</b>                        | Lipid        | Lysolipid                                            | 0.19  | 0.06 | 0.61 |
| <b>beta-hydroxyisovalerate</b>                               | Amino Acid   | Leucine, Isoleucine and Valine Metabolism            | 0.18  | 0.06 | 0.61 |
| <b>malonate (propanedioate)</b>                              | Lipid        | Fatty Acid Synthesis                                 | -0.29 | 0.06 | 0.61 |
| <b>7-alpha-hydroxycholesterol</b>                            | Lipid        | Sterol                                               | 0.33  | 0.06 | 0.61 |
| <b>fucose</b>                                                | Carbohydrate | Pentose Metabolism                                   | 0.19  | 0.07 | 0.61 |
| <b>2-oleoyl-GPC* (18:1)*</b>                                 | Lipid        | Lysolipid                                            | 0.17  | 0.07 | 0.61 |
| <b>phenylalanyleucine</b>                                    | Peptide      | Dipeptide                                            | 0.55  | 0.07 | 0.61 |
| <b>stearoyl-arachidonoyl-glycerophosphoethanolamine (1)*</b> | Lipid        | Lysolipid                                            | 0.20  | 0.07 | 0.61 |
| <b>cytidine</b>                                              | Nucleotide   | Pyrimidine Metabolism, Cytidine containing           | 0.16  | 0.07 | 0.61 |
| <b>docosahexaenoate (DHA; 22:6n3)</b>                        | Lipid        | Polyunsaturated Fatty Acid (n3 and n6)               | 0.19  | 0.07 | 0.61 |
| <b>xylitol</b>                                               | Carbohydrate | Pentose Metabolism                                   | 0.28  | 0.07 | 0.61 |
| <b>pyruvate</b>                                              | Carbohydrate | Glycolysis, Gluconeogenesis, and Pyruvate Metabolism | 0.26  | 0.07 | 0.61 |
| <b>sulfate*</b>                                              | Xenobiotics  | Chemical                                             | 0.07  | 0.07 | 0.61 |
| <b>1-methyladenosine</b>                                     | Nucleotide   | Purine Metabolism, Adenine containing                | 0.09  | 0.07 | 0.61 |
| <b>TL20:3n9 (mead acid)</b>                                  | Lipid        | Mole % Total Fatty Acid                              | 0.24  | 0.08 | 0.61 |
| <b>alpha-hydroxyisovalerate</b>                              | Amino Acid   | Leucine, Isoleucine and Valine Metabolism            | 0.21  | 0.08 | 0.61 |
| <b>stearidonate (18:4n3)</b>                                 | Lipid        | Polyunsaturated Fatty Acid (n3 and n6)               | 0.23  | 0.08 | 0.61 |
| <b>serylleucine</b>                                          | Peptide      | Dipeptide                                            | -0.67 | 0.08 | 0.61 |
| <b>3-methylglutaconate</b>                                   | Amino Acid   | Leucine, Isoleucine and Valine Metabolism            | 0.27  | 0.08 | 0.61 |
| <b>1-heptadecanoyl-GPC (17:0)</b>                            | Lipid        | Lysolipid                                            | 0.32  | 0.08 | 0.62 |
| <b>3-hydroxy-3-methylglutarate</b>                           | Lipid        | Mevalonate Metabolism                                | 0.12  | 0.08 | 0.64 |
| <b>TL18:4n3 (stearidonic acid)</b>                           | Lipid        | Mole % Total Fatty Acid                              | 0.34  | 0.09 | 0.64 |
| <b>1-eicosenoylglycerophosphocholine (20:1n9)*</b>           | Lipid        | Lysolipid                                            | 0.25  | 0.09 | 0.64 |
| <b>indoleacetylglutamine</b>                                 | Amino Acid   | Tryptophan Metabolism                                | 0.55  | 0.09 | 0.65 |
| <b>3-methylglutaryl carnitine (2)</b>                        | Amino Acid   | Lysine Metabolism                                    | 0.27  | 0.09 | 0.65 |
| <b>2-ethylhexanoic acid</b>                                  | Xenobiotics  | Chemical                                             | -0.14 | 0.09 | 0.65 |

|                                                        |                        |                                             |       |      |      |
|--------------------------------------------------------|------------------------|---------------------------------------------|-------|------|------|
| <b>hexanoylglycine (C6)</b>                            | Lipid                  | Fatty Acid Metabolism(Acyl Glycine)         | 0.53  | 0.09 | 0.65 |
| <b>orotate</b>                                         | Nucleotide             | Pyrimidine Metabolism, Orotate containing   | 0.28  | 0.09 | 0.65 |
| <b>1-linoleoyl-GPC (18:2)</b>                          | Lipid                  | Lysolipid                                   | 0.14  | 0.09 | 0.65 |
| <b>betaine</b>                                         | Amino Acid             | Glycine, Serine and Threonine Metabolism    | -0.10 | 0.10 | 0.68 |
| <b>N-acetylputrescine</b>                              | Amino Acid             | Polyamine Metabolism                        | 0.16  | 0.10 | 0.68 |
| <b>ethylmalonate</b>                                   | Amino Acid             | Leucine, Isoleucine and Valine Metabolism   | 0.18  | 0.10 | 0.68 |
| <b>2-palmitoylglycerol (16:0)</b>                      | Lipid                  | Monoacylglycerol                            | 0.26  | 0.10 | 0.68 |
| <b>stearylcarntine (C18)</b>                           | Lipid                  | Fatty Acid Metabolism(Acyl Carnitine)       | 0.19  | 0.10 | 0.69 |
| <b>glutamine</b>                                       | Amino Acid             | Glutamate Metabolism                        | -0.06 | 0.11 | 0.69 |
| <b>1-methylnicotinamide</b>                            | Cofactors and Vitamins | Nicotinate and Nicotinamide Metabolism      | -0.43 | 0.11 | 0.69 |
| <b>tetradecanedioate (C14)</b>                         | Lipid                  | Fatty Acid, Dicarboxylate                   | -0.21 | 0.11 | 0.69 |
| <b>hexadecanedioate (C16)</b>                          | Lipid                  | Fatty Acid, Dicarboxylate                   | -0.20 | 0.11 | 0.69 |
| <b>TL20:5n3 (eicosapentaenoic acid)</b>                | Lipid                  | Mole % Total Fatty Acid                     | 0.24  | 0.11 | 0.69 |
| <b>eicosapentaenoate (EPA; 20:5n3)</b>                 | Lipid                  | Polyunsaturated Fatty Acid (n3 and n6)      | 0.25  | 0.11 | 0.69 |
| <b>1-arachidoyl-GPC (20:0)</b>                         | Lipid                  | Lysolipid                                   | 0.51  | 0.11 | 0.69 |
| <b>stearyl-arachidonoyl-glycerophosphocholine (2)*</b> | Lipid                  | Lysolipid                                   | 0.11  | 0.11 | 0.69 |
| <b>3-hydroxyoctanoate</b>                              | Lipid                  | Fatty Acid, Monohydroxy                     | -0.18 | 0.11 | 0.70 |
| <b>dimethylarginine (ADMA + SDMA)</b>                  | Amino Acid             | Urea cycle; Arginine and Proline Metabolism | -0.05 | 0.12 | 0.72 |
| <b>sphinganine</b>                                     | Lipid                  | Sphingolipid Metabolism                     | 0.51  | 0.12 | 0.73 |
| <b>arachidonate (20:4n6)</b>                           | Lipid                  | Polyunsaturated Fatty Acid (n3 and n6)      | 0.09  | 0.12 | 0.73 |
| <b>6-oxopiperidine-2-carboxylic acid</b>               | Xenobiotics            | Drug                                        | 0.14  | 0.12 | 0.73 |
| <b>TL22:5n3 (docosapentaenoic acid)</b>                | Lipid                  | Mole % Total Fatty Acid                     | 0.11  | 0.13 | 0.74 |
| <b>alpha-hydroxycaproate</b>                           | Lipid                  | Fatty Acid, Monohydroxy                     | 0.13  | 0.13 | 0.74 |
| <b>5,6-dihydrothymine</b>                              | Nucleotide             | Pyrimidine Metabolism, Thymine containing   | -0.12 | 0.13 | 0.74 |
| <b>3-hydroxy-2-ethylpropionate</b>                     | Amino Acid             | Leucine, Isoleucine and Valine Metabolism   | 0.12  | 0.13 | 0.74 |
| <b>stearate (18:0)</b>                                 | Lipid                  | Long Chain Fatty Acid                       | 0.07  | 0.13 | 0.74 |
| <b>1-eicosadienoyl-GPC* (20:2)*</b>                    | Lipid                  | Lysolipid                                   | 0.20  | 0.13 | 0.74 |
| <b>3-methyl catechol sulfate (1)</b>                   | Xenobiotics            | Benzoate Metabolism                         | 0.47  | 0.13 | 0.74 |
| <b>glutamate</b>                                       | Amino Acid             | Glutamate Metabolism                        | 0.12  | 0.14 | 0.74 |
| <b>trimethylamine N-oxide</b>                          | Lipid                  | Phospholipid Metabolism                     | 0.67  | 0.14 | 0.75 |
| <b>dopamine sulfate (2)</b>                            | Amino Acid             | Phenylalanine and Tyrosine Metabolism       | -0.16 | 0.14 | 0.75 |
| <b>myristoylcarnitine</b>                              | Lipid                  | Fatty Acid Metabolism(Acyl Carnitine)       | 0.20  | 0.14 | 0.75 |
| <b>phenyllactate (PLA)</b>                             | Amino Acid             | Phenylalanine and Tyrosine Metabolism       | 0.11  | 0.14 | 0.75 |



|                                        |             |                                                      |       |      |      |
|----------------------------------------|-------------|------------------------------------------------------|-------|------|------|
| <b>gamma-glutamylalanine</b>           | Peptide     | Gamma-glutamyl Amino Acid                            | 0.14  | 0.14 | 0.75 |
| <b>2-aminooctanoate</b>                | Lipid       | Fatty Acid, Amino                                    | 0.19  | 0.14 | 0.75 |
| <b>N-acetylglycine</b>                 | Amino Acid  | Glycine, Serine and Threonine Metabolism             | 0.18  | 0.14 | 0.75 |
| <b>TL20:1n9 (eicosanoic acid)</b>      | Lipid       | Mole % Total Fatty Acid                              | -0.07 | 0.14 | 0.75 |
| <b>1,2,3-benzenetriol sulfate (2)</b>  | Xenobiotics | Chemical                                             | -0.67 | 0.15 | 0.75 |
| <b>xanthosine</b>                      | Nucleotide  | Purine Metabolism, (Hypo)Xanthine/Inosine containing | 0.16  | 0.15 | 0.75 |
| <b>TL16:1n7 (palmitoleic acid)</b>     | Lipid       | Mole % Total Fatty Acid                              | 0.14  | 0.16 | 0.75 |
| <b>4-hydroxyhippurate</b>              | Xenobiotics | Benzoate Metabolism                                  | -0.28 | 0.16 | 0.75 |
| <b>2-linoleoyl-GPE* (18:2)*</b>        | Lipid       | Lysolipid                                            | 0.17  | 0.16 | 0.75 |
| <b>9,10-DiHOME</b>                     | Lipid       | Fatty Acid, Dihydroxy                                | -0.30 | 0.16 | 0.75 |
| <b>palmitoylcarnitine (C16)</b>        | Lipid       | Fatty Acid Metabolism(Acyl Carnitine)                | 0.15  | 0.16 | 0.75 |
| <b>TL18:2n6 (linoleic acid)</b>        | Lipid       | Mole % Total Fatty Acid                              | -0.07 | 0.16 | 0.75 |
| <b>indolepropionate</b>                | Amino Acid  | Tryptophan Metabolism                                | -0.28 | 0.16 | 0.75 |
| <b>3-ureidopropionate</b>              | Nucleotide  | Pyrimidine Metabolism, Uracil containing             | 0.14  | 0.16 | 0.75 |
| <b>1-stearoylglycerol (18:0)</b>       | Lipid       | Monoacylglycerol                                     | 0.42  | 0.16 | 0.75 |
| <b>N-acetylleucine</b>                 | Amino Acid  | Leucine, Isoleucine and Valine Metabolism            | -0.12 | 0.16 | 0.75 |
| <b>myristoyl sphingomyelin*</b>        | Lipid       | Sphingolipid Metabolism                              | 0.07  | 0.16 | 0.75 |
| <b>alpha-ketobutyrate</b>              | Amino Acid  | Methionine, Cysteine, SAM and Taurine Metabolism     | 0.29  | 0.16 | 0.75 |
| <b>dodecanedioate (C12)</b>            | Lipid       | Fatty Acid, Dicarboxylate                            | -0.18 | 0.17 | 0.76 |
| <b>cysteine-glutathione disulfide</b>  | Amino Acid  | Glutathione Metabolism                               | -0.38 | 0.17 | 0.76 |
| <b>4-imidazoleacetate</b>              | Amino Acid  | Histidine Metabolism                                 | -0.36 | 0.17 | 0.76 |
| <b>TL14:0 (myristic acid)</b>          | Lipid       | Mole % Total Fatty Acid                              | 0.14  | 0.17 | 0.76 |
| <b>2-hydroxybutyrate (AHB)</b>         | Amino Acid  | Methionine, Cysteine, SAM and Taurine Metabolism     | 0.14  | 0.17 | 0.76 |
| <b>gamma-glutamylisoleucine*</b>       | Peptide     | Gamma-glutamyl Amino Acid                            | 0.09  | 0.17 | 0.76 |
| <b>homocitrulline</b>                  | Amino Acid  | Urea cycle; Arginine and Proline Metabolism          | 0.18  | 0.17 | 0.76 |
| <b>gamma-glutamyl-2-aminobutyrate</b>  | Peptide     | Gamma-glutamyl Amino Acid                            | 0.25  | 0.18 | 0.76 |
| <b>1,6-anhydroglucose</b>              | Xenobiotics | Food Component/Plant                                 | -0.30 | 0.18 | 0.76 |
| <b>gamma-glutamylvaline</b>            | Peptide     | Gamma-glutamyl Amino Acid                            | 0.07  | 0.18 | 0.76 |
| <b>inosine</b>                         | Nucleotide  | Purine Metabolism, (Hypo)Xanthine/Inosine containing | -0.41 | 0.18 | 0.76 |
| <b>2-aminoheptanoate</b>               | Lipid       | Fatty Acid, Amino                                    | 0.13  | 0.18 | 0.76 |
| <b>creatine</b>                        | Amino Acid  | Creatine Metabolism                                  | 0.15  | 0.18 | 0.76 |
| <b>3-(4-hydroxyphenyl)propionate</b>   | Amino Acid  | Phenylalanine and Tyrosine Metabolism                | -0.51 | 0.18 | 0.76 |
| <b>docosapentaenoate (DPA; 22:5n3)</b> | Lipid       | Polyunsaturated Fatty Acid (n3 and n6)               | 0.14  | 0.18 | 0.76 |

|                                                         |                        |                                                      |       |      |      |
|---------------------------------------------------------|------------------------|------------------------------------------------------|-------|------|------|
| <b>5-oxoproline</b>                                     | Amino Acid             | Glutathione Metabolism                               | -0.11 | 0.18 | 0.76 |
| <b>1-myristoylglycerol (14:0)</b>                       | Lipid                  | Monoacylglycerol                                     | 0.20  | 0.18 | 0.76 |
| <b>2-methylmalonyl carnitine</b>                        | Lipid                  | Fatty Acid Synthesis                                 | -0.11 | 0.19 | 0.76 |
| <b>oxalate (ethanedioate)</b>                           | Cofactors and Vitamins | Ascorbate and Aldarate Metabolism                    | -0.21 | 0.19 | 0.76 |
| <b>2-keto-3-deoxy-gluconate</b>                         | Xenobiotics            | Food Component/Plant                                 | 0.17  | 0.19 | 0.76 |
| <b>1,5-anhydroglucitol (1,5-AG)</b>                     | Carbohydrate           | Glycolysis, Gluconeogenesis, and Pyruvate Metabolism | -0.19 | 0.19 | 0.76 |
| <b>hydantoin-5-propionic acid</b>                       | Amino Acid             | Histidine Metabolism                                 | 0.30  | 0.19 | 0.76 |
| <b>homostachydrine*</b>                                 | Xenobiotics            | Food Component/Plant                                 | -0.17 | 0.19 | 0.76 |
| <b>butyrylcarnitine (C4)</b>                            | Lipid                  | Fatty Acid Metabolism (also BCAA Metabolism)         | 0.15  | 0.19 | 0.76 |
| <b>N-methylproline</b>                                  | Amino Acid             | Urea cycle; Arginine and Proline Metabolism          | -0.33 | 0.20 | 0.77 |
| <b>orotidine</b>                                        | Nucleotide             | Pyrimidine Metabolism, Orotate containing            | 0.29  | 0.20 | 0.77 |
| <b>aspartylphenylalanine</b>                            | Peptide                | Dipeptide                                            | 0.29  | 0.20 | 0.77 |
| <b>sorbitol</b>                                         | Carbohydrate           | Fructose, Mannose and Galactose Metabolism           | 0.21  | 0.20 | 0.77 |
| <b>taurocholenate sulfate</b>                           | Lipid                  | Secondary Bile Acid Metabolism                       | -0.22 | 0.20 | 0.77 |
| <b>thyroxine</b>                                        | Amino Acid             | Phenylalanine and Tyrosine Metabolism                | 0.35  | 0.20 | 0.77 |
| <b>arabinose</b>                                        | Carbohydrate           | Pentose Metabolism                                   | 0.28  | 0.20 | 0.77 |
| <b>N-acetylmethionine</b>                               | Amino Acid             | Methionine, Cysteine, SAM and Taurine Metabolism     | -0.20 | 0.20 | 0.77 |
| <b>methyl indole-3-acetate</b>                          | Xenobiotics            | Food Component/Plant                                 | 0.19  | 0.21 | 0.77 |
| <b>methylsuccinate</b>                                  | Amino Acid             | Leucine, Isoleucine and Valine Metabolism            | -0.09 | 0.21 | 0.77 |
| <b>oleamide</b>                                         | Lipid                  | Fatty Acid, Amide                                    | 0.23  | 0.21 | 0.77 |
| <b>gamma-CEHC glucuronide*</b>                          | Cofactors and Vitamins | Tocopherol Metabolism                                | 0.39  | 0.21 | 0.77 |
| <b>2'-deoxyuridine</b>                                  | Nucleotide             | Pyrimidine Metabolism, Uracil containing             | -0.17 | 0.21 | 0.77 |
| <b>prolylhydroxyproline</b>                             | Amino Acid             | Urea cycle; Arginine and Proline Metabolism          | 0.16  | 0.21 | 0.77 |
| <b>pyridoxine (Vitamin B6)</b>                          | Cofactors and Vitamins | Vitamin B6 Metabolism                                | -0.11 | 0.21 | 0.77 |
| <b>5-HETE</b>                                           | Lipid                  | Eicosanoid                                           | 0.22  | 0.21 | 0.78 |
| <b>5-methylthioadenosine (MTA)</b>                      | Amino Acid             | Polyamine Metabolism                                 | 0.38  | 0.22 | 0.78 |
| <b>7-dehydro-cholesterol</b>                            | Lipid                  | Sterol                                               | 0.44  | 0.22 | 0.78 |
| <b>4-methyl-2-oxopentanoate</b>                         | Amino Acid             | Leucine, Isoleucine and Valine Metabolism            | 0.08  | 0.22 | 0.78 |
| <b>stearoyl-arachidonoyl-glycerophosphocholine (1)*</b> | Lipid                  | Lysolipid                                            | -0.24 | 0.22 | 0.78 |
| <b>oleoylcarnitine (C18)</b>                            | Lipid                  | Fatty Acid Metabolism(Acyl Carnitine)                | 0.15  | 0.22 | 0.78 |
| <b>1-linoleoylglycerol (18:2)</b>                       | Lipid                  | Monoacylglycerol                                     | 0.13  | 0.22 | 0.78 |
| <b>gluconate</b>                                        | Xenobiotics            | Food Component/Plant                                 | 0.10  | 0.22 | 0.78 |
| <b>pyroglutamine*</b>                                   | Amino Acid             | Glutamate Metabolism                                 | -0.18 | 0.23 | 0.78 |

|                                           |                        |                                             |       |      |      |
|-------------------------------------------|------------------------|---------------------------------------------|-------|------|------|
| <b>N-oleoyltaurine</b>                    | Lipid                  | Endocannabinoid                             | 0.29  | 0.23 | 0.79 |
| <b>1-palmitoylglycerol (16:0)</b>         | Lipid                  | Monoacylglycerol                            | 0.11  | 0.23 | 0.79 |
| <b>tyrosylglutamate</b>                   | Peptide                | Dipeptide                                   | 0.32  | 0.23 | 0.79 |
| <b>beta-tocopherol</b>                    | Cofactors and Vitamins | Tocopherol Metabolism                       | 0.26  | 0.23 | 0.79 |
| <b>alanine</b>                            | Amino Acid             | Alanine and Aspartate Metabolism            | 0.06  | 0.23 | 0.79 |
| <b>inositol 1-phosphate (I1P)</b>         | Lipid                  | Inositol Metabolism                         | 0.13  | 0.24 | 0.79 |
| <b>TLTL (Total Total Lipid)</b>           | Lipid                  | Quantitative Total Fatty Acid               | 0.10  | 0.24 | 0.79 |
| <b>N6-methyladenosine</b>                 | Nucleotide             | Purine Metabolism, Adenine containing       | 0.12  | 0.24 | 0.79 |
| <b>N-acetyl-aspartyl-glutamate (NAAG)</b> | Amino Acid             | Glutamate Metabolism                        | -0.09 | 0.24 | 0.80 |
| <b>3-methoxycatechol sulfate (1)</b>      | Xenobiotics            | Benzoate Metabolism                         | -0.43 | 0.24 | 0.80 |
| <b>leucylalanine</b>                      | Peptide                | Dipeptide                                   | 0.28  | 0.25 | 0.81 |
| <b>glutaryl carnitine (C5)</b>            | Amino Acid             | Lysine Metabolism                           | 0.08  | 0.25 | 0.81 |
| <b>indolebutyrate</b>                     | Amino Acid             | Tryptophan Metabolism                       | 0.24  | 0.25 | 0.81 |
| <b>caprylate (8:0)</b>                    | Lipid                  | Medium Chain Fatty Acid                     | -0.07 | 0.25 | 0.81 |
| <b>desmosterol</b>                        | Lipid                  | Sterol                                      | -0.20 | 0.25 | 0.81 |
| <b>4-hydroxyphenylpyruvate</b>            | Amino Acid             | Phenylalanine and Tyrosine Metabolism       | 0.15  | 0.25 | 0.81 |
| <b>erythronate*</b>                       | Carbohydrate           | Aminosugar Metabolism                       | 0.07  | 0.25 | 0.81 |
| <b>allo-isoleucine</b>                    | Amino Acid             | Leucine, Isoleucine and Valine Metabolism   | -0.08 | 0.26 | 0.81 |
| <b>gamma-glutamylleucine</b>              | Peptide                | Gamma-glutamyl Amino Acid                   | 0.06  | 0.26 | 0.81 |
| <b>tartronate (hydroxymalonate)</b>       | Xenobiotics            | Bacterial/Fungal                            | -0.17 | 0.26 | 0.81 |
| <b>catechol sulfate</b>                   | Xenobiotics            | Benzoate Metabolism                         | -0.24 | 0.26 | 0.81 |
| <b>1,2-propanediol</b>                    | Xenobiotics            | Chemical                                    | 0.25  | 0.26 | 0.81 |
| <b>threonate</b>                          | Cofactors and Vitamins | Ascorbate and Aldarate Metabolism           | -0.18 | 0.26 | 0.81 |
| <b>gamma-glutamyllysine</b>               | Peptide                | Gamma-glutamyl Amino Acid                   | 0.09  | 0.26 | 0.81 |
| <b>arabonate</b>                          | Cofactors and Vitamins | Ascorbate and Aldarate Metabolism           | 0.11  | 0.26 | 0.81 |
| <b>N-delta-acetylornithine</b>            | Amino Acid             | Urea cycle; Arginine and Proline Metabolism | 0.16  | 0.27 | 0.81 |
| <b>3-methoxytyramine sulfate</b>          | Amino Acid             | Phenylalanine and Tyrosine Metabolism       | 0.13  | 0.27 | 0.81 |
| <b>histidyltryptophan</b>                 | Peptide                | Dipeptide                                   | -0.23 | 0.27 | 0.81 |
| <b>TL14:1n5 (mystoleic acid)</b>          | Lipid                  | Mole % Total Fatty Acid                     | 0.18  | 0.27 | 0.82 |
| <b>gamma-tocopherol</b>                   | Cofactors and Vitamins | Tocopherol Metabolism                       | 0.16  | 0.27 | 0.82 |
| <b>12-HETE</b>                            | Lipid                  | Eicosanoid                                  | -0.28 | 0.28 | 0.82 |
| <b>docosadienoate (22:2n6)</b>            | Lipid                  | Polyunsaturated Fatty Acid (n3 and n6)      | 0.09  | 0.28 | 0.82 |
| <b>cyclo(pro-pro)</b>                     | Peptide                | Dipeptide                                   | 0.13  | 0.28 | 0.82 |
| <b>4-acetamidobutanoate</b>               | Amino Acid             | Polyamine Metabolism                        | 0.08  | 0.28 | 0.82 |

|                                                         |                        |                                           |       |      |      |
|---------------------------------------------------------|------------------------|-------------------------------------------|-------|------|------|
| <b>1-dihomo-linolenylglycerol (alpha, gamma)</b>        | Lipid                  | Monoacylglycerol                          | 0.11  | 0.28 | 0.82 |
| <b>glycolithocholate sulfate*</b>                       | Lipid                  | Secondary Bile Acid Metabolism            | -0.29 | 0.28 | 0.82 |
| <b>dopamine sulfate (1)</b>                             | Amino Acid             | Phenylalanine and Tyrosine Metabolism     | -0.18 | 0.28 | 0.82 |
| <b>5alpha-pregnan-3beta,20beta-diol monosulfate (1)</b> | Lipid                  | Steroid                                   | -0.25 | 0.29 | 0.82 |
| <b>glycylvaline</b>                                     | Peptide                | Dipeptide                                 | 0.41  | 0.29 | 0.82 |
| <b>isobutyrylglycine (C4)</b>                           | Amino Acid             | Leucine, Isoleucine and Valine Metabolism | 0.12  | 0.29 | 0.82 |
| <b>10-nonadecenoate (19:1n9)</b>                        | Lipid                  | Long Chain Fatty Acid                     | 0.10  | 0.29 | 0.82 |
| <b>TL22:6n3 (docosahexaenoic acid)</b>                  | Lipid                  | Mole % Total Fatty Acid                   | 0.10  | 0.29 | 0.82 |
| <b>2-arachidonoylglycerophosphoinositol*</b>            | Lipid                  | Lysolipid                                 | 0.23  | 0.29 | 0.82 |
| <b>alpha-tocopherol</b>                                 | Cofactors and Vitamins | Tocopherol Metabolism                     | 0.11  | 0.29 | 0.82 |
| <b>threonylphenylalanine</b>                            | Peptide                | Dipeptide                                 | -0.42 | 0.29 | 0.82 |
| <b>3-hydroxydecanoate</b>                               | Lipid                  | Fatty Acid, Monohydroxy                   | -0.10 | 0.29 | 0.82 |
| <b>glycerophosphoethanolamine</b>                       | Lipid                  | Phospholipid Metabolism                   | 0.16  | 0.30 | 0.82 |
| <b>isovalerate (C5)</b>                                 | Amino Acid             | Leucine, Isoleucine and Valine Metabolism | -0.09 | 0.30 | 0.82 |
| <b>TL24:1n9 (nervonic acid)</b>                         | Lipid                  | Mole % Total Fatty Acid                   | -0.10 | 0.30 | 0.82 |
| <b>phenylalanylserine</b>                               | Peptide                | Dipeptide                                 | -0.35 | 0.30 | 0.82 |
| <b>octadecanedioate (C18)</b>                           | Lipid                  | Fatty Acid, Dicarboxylate                 | -0.13 | 0.30 | 0.82 |
| <b>10-undecenoate (11:1n1)</b>                          | Lipid                  | Medium Chain Fatty Acid                   | -0.10 | 0.30 | 0.82 |
| <b>maleate (cis-Butenedioate)</b>                       | Lipid                  | Fatty Acid, Dicarboxylate                 | 0.15  | 0.31 | 0.82 |
| <b>4-methylcatechol sulfate</b>                         | Xenobiotics            | Benzoate Metabolism                       | -0.25 | 0.31 | 0.82 |
| <b>N-acetylcarnosine</b>                                | Peptide                | Dipeptide Derivative                      | -0.08 | 0.31 | 0.82 |
| <b>2-hydroxypalmitate</b>                               | Lipid                  | Fatty Acid, Monohydroxy                   | -0.06 | 0.31 | 0.83 |
| <b>adenosine</b>                                        | Nucleotide             | Purine Metabolism, Adenine containing     | -0.18 | 0.31 | 0.83 |
| <b>paraxanthine</b>                                     | Xenobiotics            | Xanthine Metabolism                       | -0.49 | 0.32 | 0.83 |
| <b>1-linoleoyl-GPE (18:2)*</b>                          | Lipid                  | Lysolipid                                 | 0.09  | 0.32 | 0.83 |
| <b>biliverdin</b>                                       | Cofactors and Vitamins | Hemoglobin and Porphyrin Metabolism       | -0.20 | 0.32 | 0.83 |
| <b>bilirubin (E,E)*</b>                                 | Cofactors and Vitamins | Hemoglobin and Porphyrin Metabolism       | 0.17  | 0.32 | 0.83 |
| <b>tryptophylglutamate</b>                              | Peptide                | Dipeptide                                 | -0.39 | 0.32 | 0.83 |
| <b>3-hydroxybutyrate (BHBA)</b>                         | Lipid                  | Ketone Bodies                             | -0.20 | 0.32 | 0.83 |
| <b>delta-tocopherol</b>                                 | Cofactors and Vitamins | Tocopherol Metabolism                     | 0.23  | 0.32 | 0.84 |
| <b>hydroquinone sulfate</b>                             | Xenobiotics            | Drug                                      | -0.28 | 0.32 | 0.84 |
| <b>oleoyl-linoleoyl-glycerophosphocholine (1)*</b>      | Lipid                  | Lysolipid                                 | 0.05  | 0.33 | 0.84 |
| <b>seryltyrosine</b>                                    | Peptide                | Dipeptide                                 | 0.23  | 0.33 | 0.84 |
| <b>nonadecanoate (19:0)</b>                             | Lipid                  | Long Chain Fatty Acid                     | 0.06  | 0.33 | 0.84 |

|                                                     |              |                                                      |       |      |      |
|-----------------------------------------------------|--------------|------------------------------------------------------|-------|------|------|
| <b>methionine sulfoxide</b>                         | Amino Acid   | Methionine, Cysteine, SAM and Taurine Metabolism     | -0.08 | 0.33 | 0.84 |
| <b>17-methylstearate</b>                            | Lipid        | Fatty Acid, Branched                                 | 0.10  | 0.33 | 0.84 |
| <b>palmitate (16:0)</b>                             | Lipid        | Long Chain Fatty Acid                                | 0.05  | 0.34 | 0.85 |
| <b>o-cresol sulfate</b>                             | Amino Acid   | Phenylalanine and Tyrosine Metabolism                | 0.54  | 0.34 | 0.85 |
| <b>docosapentaenoate (n6 DPA; 22:5n6)</b>           | Lipid        | Polyunsaturated Fatty Acid (n3 and n6)               | 0.07  | 0.34 | 0.85 |
| <b>mannitol</b>                                     | Carbohydrate | Fructose, Mannose and Galactose Metabolism           | 0.29  | 0.35 | 0.86 |
| <b>N-acetylisoleucine</b>                           | Amino Acid   | Leucine, Isoleucine and Valine Metabolism            | -0.14 | 0.35 | 0.86 |
| <b>N-acetylneuraminate</b>                          | Carbohydrate | Aminosugar Metabolism                                | 0.10  | 0.35 | 0.86 |
| <b>1-arachidonoylglycerophosphate</b>               | Lipid        | Lysolipid                                            | 0.11  | 0.35 | 0.86 |
| <b>TL20:4n6 (arachidonic acid)</b>                  | Lipid        | Mole % Total Fatty Acid                              | 0.06  | 0.35 | 0.86 |
| <b>3-(3-hydroxyphenyl)propionate</b>                | Amino Acid   | Phenylalanine and Tyrosine Metabolism                | -0.37 | 0.36 | 0.87 |
| <b>dimethyl sulfone</b>                             | Xenobiotics  | Chemical                                             | 0.30  | 0.36 | 0.87 |
| <b>12,13-DiHOME</b>                                 | Lipid        | Fatty Acid, Dihydroxy                                | -0.13 | 0.36 | 0.88 |
| <b>lysine</b>                                       | Amino Acid   | Lysine Metabolism                                    | 0.04  | 0.36 | 0.88 |
| <b>hypotaurine</b>                                  | Amino Acid   | Methionine, Cysteine, SAM and Taurine Metabolism     | -0.19 | 0.36 | 0.88 |
| <b>3-hydroxyisobutyrate</b>                         | Amino Acid   | Leucine, Isoleucine and Valine Metabolism            | 0.08  | 0.37 | 0.88 |
| <b>16a-hydroxy DHEA 3-sulfate</b>                   | Lipid        | Steroid                                              | -0.17 | 0.37 | 0.88 |
| <b>3-methyl-2-oxovalerate</b>                       | Amino Acid   | Leucine, Isoleucine and Valine Metabolism            | 0.05  | 0.37 | 0.88 |
| <b>cyclohexanebutanoic acid</b>                     | Xenobiotics  | Chemical                                             | -0.10 | 0.37 | 0.88 |
| <b>glucuronate</b>                                  | Carbohydrate | Aminosugar Metabolism                                | 0.09  | 0.37 | 0.88 |
| <b>methyl-4-hydroxybenzoate sulfate</b>             | Xenobiotics  | Benzoate Metabolism                                  | -0.37 | 0.37 | 0.88 |
| <b>16-hydroxypalmitate</b>                          | Lipid        | Fatty Acid, Monohydroxy                              | -0.06 | 0.37 | 0.88 |
| <b>5alpha-androstan-3beta,17beta-diol disulfate</b> | Lipid        | Steroid                                              | -0.23 | 0.37 | 0.88 |
| <b>1-methylhistidine</b>                            | Amino Acid   | Histidine Metabolism                                 | 0.09  | 0.38 | 0.88 |
| <b>indolelactate</b>                                | Amino Acid   | Tryptophan Metabolism                                | 0.06  | 0.38 | 0.88 |
| <b>betonicine</b>                                   | Xenobiotics  | Food Component/Plant                                 | -0.45 | 0.38 | 0.88 |
| <b>glycocholate</b>                                 | Lipid        | Primary Bile Acid Metabolism                         | 0.24  | 0.38 | 0.88 |
| <b>7-HOCA</b>                                       | Lipid        | Sterol                                               | 0.09  | 0.39 | 0.89 |
| <b>gamma-glutamylphenylalanine</b>                  | Peptide      | Gamma-glutamyl Amino Acid                            | 0.05  | 0.39 | 0.89 |
| <b>lactate</b>                                      | Carbohydrate | Glycolysis, Gluconeogenesis, and Pyruvate Metabolism | 0.05  | 0.39 | 0.89 |
| <b>arachidate (20:0)</b>                            | Lipid        | Long Chain Fatty Acid                                | 0.05  | 0.39 | 0.89 |
| <b>TL22:1n9 (erucic acid)</b>                       | Lipid        | Mole % Total Fatty Acid                              | -0.18 | 0.39 | 0.89 |
| <b>eicosenoyl sphingomyelin*</b>                    | Lipid        | Sphingolipid Metabolism                              | 0.07  | 0.39 | 0.89 |
| <b>succinate</b>                                    | Energy       | TCA Cycle                                            | -0.04 | 0.40 | 0.89 |

|                                                       |                        |                                                  |       |      |      |
|-------------------------------------------------------|------------------------|--------------------------------------------------|-------|------|------|
| <b>N-acetyl-3-methylhistidine*</b>                    | Amino Acid             | Histidine Metabolism                             | 0.24  | 0.40 | 0.89 |
| <b>serine</b>                                         | Amino Acid             | Glycine, Serine and Threonine Metabolism         | -0.05 | 0.40 | 0.89 |
| <b>cyclo(gly-pro)</b>                                 | Peptide                | Dipeptide                                        | 0.13  | 0.40 | 0.89 |
| <b>2-piperidinone</b>                                 | Xenobiotics            | Food Component/Plant                             | 0.23  | 0.41 | 0.89 |
| <b>1,3,7-trimethylurate</b>                           | Xenobiotics            | Xanthine Metabolism                              | -0.28 | 0.41 | 0.89 |
| <b>prolylglycine</b>                                  | Peptide                | Dipeptide                                        | -0.15 | 0.41 | 0.89 |
| <b>TL18:1n9 (oleic acid)</b>                          | Lipid                  | Mole % Total Fatty Acid                          | 0.03  | 0.41 | 0.89 |
| <b>methylpalmitate (15 or 2)</b>                      | Lipid                  | Fatty Acid, Branched                             | 0.07  | 0.41 | 0.89 |
| <b>linoleoylcarnitine*</b>                            | Lipid                  | Fatty Acid Metabolism(Acyl Carnitine)            | 0.11  | 0.41 | 0.89 |
| <b>glycylphenylalanine</b>                            | Peptide                | Dipeptide                                        | -0.22 | 0.41 | 0.89 |
| <b>valylarginine</b>                                  | Peptide                | Dipeptide                                        | 0.21  | 0.41 | 0.89 |
| <b>TL18:3n3 (a-linolenic acid)</b>                    | Lipid                  | Mole % Total Fatty Acid                          | 0.06  | 0.41 | 0.89 |
| <b>pregnenolone sulfate</b>                           | Lipid                  | Steroid                                          | 0.17  | 0.42 | 0.89 |
| <b>palmitoyl-linoleoyl-glycerophosphocholine (1)*</b> | Lipid                  | Lysolipid                                        | -0.06 | 0.42 | 0.89 |
| <b>theobromine</b>                                    | Xenobiotics            | Xanthine Metabolism                              | -0.25 | 0.42 | 0.89 |
| <b>saccharin</b>                                      | Xenobiotics            | Food Component/Plant                             | 0.48  | 0.42 | 0.89 |
| <b>3beta,7alpha-dihydroxy-5-cholestenoate</b>         | Lipid                  | Secondary Bile Acid Metabolism                   | 0.25  | 0.42 | 0.89 |
| <b>N-formylmethionine</b>                             | Amino Acid             | Methionine, Cysteine, SAM and Taurine Metabolism | 0.04  | 0.43 | 0.89 |
| <b>homovanillate (HVA)</b>                            | Amino Acid             | Phenylalanine and Tyrosine Metabolism            | -0.09 | 0.43 | 0.89 |
| <b>I-urobilinogen</b>                                 | Cofactors and Vitamins | Hemoglobin and Porphyrin Metabolism              | 0.35  | 0.43 | 0.89 |
| <b>ribose</b>                                         | Carbohydrate           | Pentose Metabolism                               | -0.13 | 0.43 | 0.89 |
| <b>gamma-CEHC</b>                                     | Cofactors and Vitamins | Tocopherol Metabolism                            | 0.11  | 0.43 | 0.89 |
| <b>dihomolinoleate (20:2n6)</b>                       | Lipid                  | Polyunsaturated Fatty Acid (n3 and n6)           | 0.07  | 0.43 | 0.89 |
| <b>N-acetylglutamine</b>                              | Amino Acid             | Glutamate Metabolism                             | -0.09 | 0.43 | 0.89 |
| <b>3-hydroxyhippurate</b>                             | Xenobiotics            | Benzoate Metabolism                              | -0.27 | 0.43 | 0.89 |
| <b>7-methylurate</b>                                  | Xenobiotics            | Xanthine Metabolism                              | -0.36 | 0.44 | 0.89 |
| <b>palmitoyl-linoleoyl-glycerophosphocholine (2)*</b> | Lipid                  | Lysolipid                                        | -0.05 | 0.44 | 0.89 |
| <b>glycerol 3-phosphate (G3P)</b>                     | Lipid                  | Glycerolipid Metabolism                          | 0.18  | 0.44 | 0.89 |
| <b>N-acetylaspartate (NAA)</b>                        | Amino Acid             | Alanine and Aspartate Metabolism                 | -0.05 | 0.44 | 0.89 |
| <b>kynurenate</b>                                     | Amino Acid             | Tryptophan Metabolism                            | -0.08 | 0.44 | 0.89 |
| <b>octanoylcarnitine (C8)</b>                         | Lipid                  | Fatty Acid Metabolism(Acyl Carnitine)            | -0.07 | 0.44 | 0.89 |
| <b>asparagine</b>                                     | Amino Acid             | Alanine and Aspartate Metabolism                 | -0.03 | 0.44 | 0.89 |
| <b>cis-Cyclo[L-ala-L-Pro]</b>                         | Peptide                | Dipeptide                                        | 0.07  | 0.44 | 0.89 |

|                                                             |                        |                                             |       |      |      |
|-------------------------------------------------------------|------------------------|---------------------------------------------|-------|------|------|
| <b>3-carboxy-4-methyl-5-propyl-2-furanpropanoate (CMPF)</b> | Lipid                  | Fatty Acid, Dicarboxylate                   | 0.28  | 0.45 | 0.89 |
| <b>tauroolithocholate 3-sulfate</b>                         | Lipid                  | Secondary Bile Acid Metabolism              | -0.26 | 0.45 | 0.89 |
| <b>trigonelline (N'-methylnicotinate)</b>                   | Cofactors and Vitamins | Nicotinate and Nicotinamide Metabolism      | -0.18 | 0.45 | 0.89 |
| <b>pantothenate (Vitamin B5)</b>                            | Cofactors and Vitamins | Pantothenate and CoA Metabolism             | 0.09  | 0.45 | 0.89 |
| <b>acisoga</b>                                              | Amino Acid             | Polyamine Metabolism                        | 0.07  | 0.45 | 0.89 |
| <b>glycine</b>                                              | Amino Acid             | Glycine, Serine and Threonine Metabolism    | -0.06 | 0.45 | 0.89 |
| <b>malate</b>                                               | Energy                 | TCA Cycle                                   | -0.06 | 0.45 | 0.89 |
| <b>1-palmitoleoyl-GPI* (16:1)*</b>                          | Lipid                  | Lysolipid                                   | 0.33  | 0.45 | 0.89 |
| <b>pseudouridine</b>                                        | Nucleotide             | Pyrimidine Metabolism, Uracil containing    | 0.04  | 0.46 | 0.90 |
| <b>erythritol</b>                                           | Xenobiotics            | Food Component/Plant                        | 0.09  | 0.47 | 0.90 |
| <b>4-androsten-3beta,17beta-diol monosulfate (1)</b>        | Lipid                  | Steroid                                     | 0.15  | 0.47 | 0.90 |
| <b>cis-4-decenoyl carnitine</b>                             | Lipid                  | Fatty Acid Metabolism(Acyl Carnitine)       | -0.07 | 0.47 | 0.90 |
| <b>TL18:0 (stearic acid)</b>                                | Lipid                  | Mole % Total Fatty Acid                     | -0.03 | 0.47 | 0.90 |
| <b>urea</b>                                                 | Amino Acid             | Urea cycle; Arginine and Proline Metabolism | 0.06  | 0.47 | 0.90 |
| <b>eicosenoate (20:1n9 or 1n11)</b>                         | Lipid                  | Long Chain Fatty Acid                       | 0.07  | 0.47 | 0.90 |
| <b>gamma-glutamylmethionine</b>                             | Peptide                | Gamma-glutamyl Amino Acid                   | 0.07  | 0.47 | 0.90 |
| <b>androsterone sulfate</b>                                 | Lipid                  | Steroid                                     | -0.18 | 0.47 | 0.90 |
| <b>1-palmitoylglycerophosphate</b>                          | Lipid                  | Lysolipid                                   | 0.11  | 0.48 | 0.90 |
| <b>TL22:4n6 (adrenic acid)</b>                              | Lipid                  | Mole % Total Fatty Acid                     | 0.06  | 0.48 | 0.90 |
| <b>1,3-dimethylurate</b>                                    | Xenobiotics            | Xanthine Metabolism                         | -0.30 | 0.48 | 0.90 |
| <b>dihydroorotate</b>                                       | Nucleotide             | Pyrimidine Metabolism, Orotate containing   | 0.17  | 0.48 | 0.90 |
| <b>palmitoyl-linoleoyl-glycerophosphoinositol (1)*</b>      | Lipid                  | Lysolipid                                   | 0.14  | 0.48 | 0.90 |
| <b>cyclo(L-phe-L-pro)</b>                                   | Peptide                | Dipeptide                                   | -0.15 | 0.48 | 0.90 |
| <b>maltose</b>                                              | Carbohydrate           | Glycogen Metabolism                         | 0.18  | 0.48 | 0.90 |
| <b>caffeine</b>                                             | Xenobiotics            | Xanthine Metabolism                         | -0.32 | 0.48 | 0.90 |
| <b>ornithine</b>                                            | Amino Acid             | Urea cycle; Arginine and Proline Metabolism | -0.06 | 0.49 | 0.90 |
| <b>TL22:5n6 (osbond acid)</b>                               | Lipid                  | Mole % Total Fatty Acid                     | 0.07  | 0.49 | 0.90 |
| <b>salicyluric glucuronide*</b>                             | Xenobiotics            | Drug                                        | 0.37  | 0.49 | 0.90 |
| <b>margarate (17:0)</b>                                     | Lipid                  | Long Chain Fatty Acid                       | 0.06  | 0.49 | 0.90 |
| <b>2-hydroxyoctanoate</b>                                   | Lipid                  | Fatty Acid, Monohydroxy                     | 0.08  | 0.49 | 0.90 |
| <b>alpha-glutamyltyrosine</b>                               | Peptide                | Dipeptide                                   | -0.23 | 0.49 | 0.90 |
| <b>lanosterol</b>                                           | Lipid                  | Sterol                                      | -0.18 | 0.49 | 0.90 |
| <b>5alpha-pregnan-3beta,20alpha-diol disulfate</b>          | Lipid                  | Steroid                                     | 0.14  | 0.49 | 0.90 |
| <b>1-linoleoyl-GPI* (18:2)*</b>                             | Lipid                  | Lysolipid                                   | 0.07  | 0.49 | 0.90 |

|                                                       |              |                                                      |       |      |      |
|-------------------------------------------------------|--------------|------------------------------------------------------|-------|------|------|
| <b>leucylglycine</b>                                  | Peptide      | Dipeptide                                            | -0.24 | 0.49 | 0.90 |
| <b>3-(4-hydroxyphenyl)lactate (HPLA)</b>              | Amino Acid   | Phenylalanine and Tyrosine Metabolism                | 0.04  | 0.50 | 0.90 |
| <b>isoleucylglycine</b>                               | Peptide      | Dipeptide                                            | -0.15 | 0.50 | 0.90 |
| <b>10-heptadecenoate (17:1n7)</b>                     | Lipid        | Long Chain Fatty Acid                                | 0.07  | 0.50 | 0.90 |
| <b>serylalanine</b>                                   | Peptide      | Dipeptide                                            | 0.11  | 0.50 | 0.90 |
| <b>xanthine</b>                                       | Nucleotide   | Purine Metabolism, (Hypo)Xanthine/Inosine containing | 0.07  | 0.50 | 0.90 |
| <b>arabitol</b>                                       | Carbohydrate | Pentose Metabolism                                   | 0.05  | 0.50 | 0.90 |
| <b>5alpha-androstan-3beta,17alpha-diol disulfate</b>  | Lipid        | Steroid                                              | -0.20 | 0.50 | 0.90 |
| <b>2-linolenoylglycerophosphocholine (18:3n3)*</b>    | Lipid        | Lysolipid                                            | -0.21 | 0.51 | 0.90 |
| <b>palmitoyl-oleoyl-glycerophosphoglycerol (2)*</b>   | Lipid        | Lysolipid                                            | 0.22  | 0.51 | 0.90 |
| <b>3beta,7beta-dihydroxy-5-cholestenoate</b>          | Lipid        | Sterol                                               | -0.06 | 0.51 | 0.90 |
| <b>TL20:2n6 (eicosadienoic acid)</b>                  | Lipid        | Mole % Total Fatty Acid                              | 0.05  | 0.51 | 0.90 |
| <b>1-oleoyl-GPI (18:1)*</b>                           | Lipid        | Lysolipid                                            | 0.08  | 0.51 | 0.90 |
| <b>3-methylhistidine</b>                              | Amino Acid   | Histidine Metabolism                                 | 0.16  | 0.51 | 0.91 |
| <b>threitol</b>                                       | Carbohydrate | Pentose Metabolism                                   | -0.08 | 0.52 | 0.91 |
| <b>1-arachidonoyl-GPI* (20:4)*</b>                    | Lipid        | Lysolipid                                            | 0.05  | 0.52 | 0.91 |
| <b>taurine</b>                                        | Amino Acid   | Methionine, Cysteine, SAM and Taurine Metabolism     | -0.06 | 0.52 | 0.91 |
| <b>theophylline</b>                                   | Xenobiotics  | Xanthine Metabolism                                  | -0.26 | 0.52 | 0.91 |
| <b>methionine</b>                                     | Amino Acid   | Methionine, Cysteine, SAM and Taurine Metabolism     | -0.03 | 0.52 | 0.91 |
| <b>N-palmitoyl glycine</b>                            | Lipid        | Fatty Acid Metabolism(Acyl Glycine)                  | -0.08 | 0.52 | 0.91 |
| <b>5-methyluridine (ribothymidine)</b>                | Nucleotide   | Pyrimidine Metabolism, Uracil containing             | -0.04 | 0.52 | 0.91 |
| <b>gamma-glutamylglutamate</b>                        | Peptide      | Gamma-glutamyl Amino Acid                            | 0.10  | 0.53 | 0.91 |
| <b>O-methylcatechol sulfate</b>                       | Xenobiotics  | Benzoate Metabolism                                  | -0.13 | 0.53 | 0.91 |
| <b>2-hydroxystearate</b>                              | Lipid        | Fatty Acid, Monohydroxy                              | -0.03 | 0.54 | 0.91 |
| <b>palmitoyl-palmitoyl-glycerophosphocholine (2)*</b> | Lipid        | Lysolipid                                            | 0.07  | 0.54 | 0.91 |
| <b>ergothioneine</b>                                  | Xenobiotics  | Food Component/Plant                                 | 0.12  | 0.54 | 0.91 |
| <b>3-indoxyl sulfate</b>                              | Amino Acid   | Tryptophan Metabolism                                | 0.10  | 0.54 | 0.91 |
| <b>uridine</b>                                        | Nucleotide   | Pyrimidine Metabolism, Uracil containing             | 0.03  | 0.54 | 0.91 |
| <b>linolenate (18:3n3 or 3n6)</b>                     | Lipid        | Polyunsaturated Fatty Acid (n3 and n6)               | 0.06  | 0.54 | 0.91 |
| <b>TL20:0 (arachidic acid)</b>                        | Lipid        | Mole % Total Fatty Acid                              | -0.04 | 0.54 | 0.91 |
| <b>pyroglutamylglutamine</b>                          | Peptide      | Dipeptide                                            | 0.10  | 0.54 | 0.91 |
| <b>4-androsten-3beta,17beta-diol disulfate (2)</b>    | Lipid        | Steroid                                              | -0.09 | 0.54 | 0.91 |



|                                                          |              |                                                  |       |      |      |
|----------------------------------------------------------|--------------|--------------------------------------------------|-------|------|------|
| <b>1,7-dimethylurate</b>                                 | Xenobiotics  | Xanthine Metabolism                              | -0.24 | 0.54 | 0.91 |
| <b>vanillylmandelate (VMA)</b>                           | Amino Acid   | Phenylalanine and Tyrosine Metabolism            | -0.07 | 0.55 | 0.92 |
| <b>beta-alanine</b>                                      | Nucleotide   | Pyrimidine Metabolism, Uracil containing         | -0.06 | 0.55 | 0.92 |
| <b>hydroxybutyrylcarnitine*</b>                          | Lipid        | Fatty Acid Metabolism(Acyl Carnitine)            | -0.11 | 0.55 | 0.92 |
| <b>myristate (14:0)</b>                                  | Lipid        | Long Chain Fatty Acid                            | 0.05  | 0.56 | 0.92 |
| <b>stearoyl-arachidonoyl-glycerophosphoinositol (1)*</b> | Lipid        | Lysolipid                                        | 0.04  | 0.56 | 0.93 |
| <b>fructose</b>                                          | Carbohydrate | Fructose, Mannose and Galactose Metabolism       | 0.05  | 0.57 | 0.93 |
| <b>N-acetylserine</b>                                    | Amino Acid   | Glycine, Serine and Threonine Metabolism         | 0.03  | 0.57 | 0.93 |
| <b>1-methylimidazoleacetate</b>                          | Amino Acid   | Histidine Metabolism                             | 0.10  | 0.57 | 0.93 |
| <b>2-aminoadipate</b>                                    | Amino Acid   | Lysine Metabolism                                | 0.05  | 0.57 | 0.93 |
| <b>imidazole lactate</b>                                 | Amino Acid   | Histidine Metabolism                             | 0.05  | 0.57 | 0.93 |
| <b>phenylacetate</b>                                     | Amino Acid   | Phenylalanine and Tyrosine Metabolism            | 0.09  | 0.57 | 0.93 |
| <b>glycylproline</b>                                     | Peptide      | Dipeptide                                        | 0.14  | 0.57 | 0.93 |
| <b>phenylcarnitine*</b>                                  | Xenobiotics  | Chemical                                         | -0.18 | 0.57 | 0.93 |
| <b>pyroglutamylvaline</b>                                | Peptide      | Dipeptide                                        | -0.05 | 0.58 | 0.93 |
| <b>oleic ethanolamide</b>                                | Lipid        | Endocannabinoid                                  | -0.05 | 0.58 | 0.93 |
| <b>tryptophan betaine</b>                                | Amino Acid   | Tryptophan Metabolism                            | -0.15 | 0.58 | 0.93 |
| <b>glycylglycine</b>                                     | Peptide      | Dipeptide                                        | -0.24 | 0.58 | 0.93 |
| <b>N-methylpipercolate</b>                               | Xenobiotics  | Chemical                                         | -0.10 | 0.58 | 0.93 |
| <b>2-oleoylglycerol (18:1)</b>                           | Lipid        | Monoacylglycerol                                 | 0.06  | 0.58 | 0.93 |
| <b>4-hydroxychlorothalonil</b>                           | Xenobiotics  | Chemical                                         | 0.08  | 0.58 | 0.93 |
| <b>2-aminobutyrate</b>                                   | Amino Acid   | Methionine, Cysteine, SAM and Taurine Metabolism | -0.05 | 0.59 | 0.93 |
| <b>HWESASXX*</b>                                         | Peptide      | Polypeptide                                      | -0.12 | 0.59 | 0.93 |
| <b>TL20:3n6 (di-homo-g-linoleic acid)</b>                | Lipid        | Mole % Total Fatty Acid                          | -0.03 | 0.59 | 0.93 |
| <b>glycochenodeoxycholate</b>                            | Lipid        | Primary Bile Acid Metabolism                     | 0.13  | 0.59 | 0.93 |
| <b>fumarate</b>                                          | Energy       | TCA Cycle                                        | -0.05 | 0.59 | 0.93 |
| <b>cyclo(leu-pro)</b>                                    | Peptide      | Dipeptide                                        | -0.10 | 0.59 | 0.93 |
| <b>cholestanol</b>                                       | Lipid        | Sterol                                           | -0.05 | 0.60 | 0.94 |
| <b>5alpha-androstan-3alpha,17beta-diol disulfate</b>     | Lipid        | Steroid                                          | -0.18 | 0.60 | 0.94 |
| <b>choline</b>                                           | Lipid        | Phospholipid Metabolism                          | 0.03  | 0.60 | 0.94 |
| <b>phenylacetylglutamine</b>                             | Amino Acid   | Phenylalanine and Tyrosine Metabolism            | 0.09  | 0.60 | 0.94 |
| <b>4-androsten-3beta,17beta-diol monosulfate (2)</b>     | Lipid        | Steroid                                          | -0.13 | 0.60 | 0.94 |
| <b>1-oleoylglycerol (18:1)</b>                           | Lipid        | Monoacylglycerol                                 | 0.06  | 0.61 | 0.94 |
| <b>4-guanidinobutanoate</b>                              | Amino Acid   | Guanidino and Acetamido Metabolism               | -0.16 | 0.61 | 0.94 |

|                                                          |                        |                                                      |       |      |      |
|----------------------------------------------------------|------------------------|------------------------------------------------------|-------|------|------|
| <b>5alpha-pregnan-3beta,20alpha-diol monosulfate (2)</b> | Lipid                  | Steroid                                              | 0.19  | 0.61 | 0.94 |
| <b>erucate (22:1n9)</b>                                  | Lipid                  | Long Chain Fatty Acid                                | 0.05  | 0.61 | 0.94 |
| <b>N-acetyltaurine</b>                                   | Amino Acid             | Methionine, Cysteine, SAM and Taurine Metabolism     | 0.06  | 0.61 | 0.94 |
| <b>sphingomyelin</b>                                     | Lipid                  | Sphingolipid Metabolism                              | 0.04  | 0.61 | 0.94 |
| <b>3-methoxycatechol sulfate (2)</b>                     | Xenobiotics            | Benzoate Metabolism                                  | -0.14 | 0.62 | 0.94 |
| <b>2,3-dihydroxyisovalerate</b>                          | Xenobiotics            | Food Component/Plant                                 | 0.17  | 0.62 | 0.94 |
| <b>glycocholenate sulfate*</b>                           | Lipid                  | Secondary Bile Acid Metabolism                       | -0.05 | 0.62 | 0.94 |
| <b>3-[3-(sulfooxy)phenyl]propanoic acid</b>              | Amino Acid             | Phenylalanine and Tyrosine Metabolism                | -0.23 | 0.62 | 0.94 |
| <b>5,6-dihydrouracil</b>                                 | Nucleotide             | Pyrimidine Metabolism, Uracil containing             | -0.04 | 0.62 | 0.94 |
| <b>allantoin</b>                                         | Nucleotide             | Purine Metabolism, (Hypo)Xanthine/Inosine containing | -0.08 | 0.62 | 0.94 |
| <b>oleoyl sphingomyelin</b>                              | Lipid                  | Sphingolipid Metabolism                              | 0.03  | 0.62 | 0.94 |
| <b>cysteine</b>                                          | Amino Acid             | Methionine, Cysteine, SAM and Taurine Metabolism     | -0.05 | 0.62 | 0.94 |
| <b>tyrosine</b>                                          | Amino Acid             | Phenylalanine and Tyrosine Metabolism                | -0.03 | 0.62 | 0.94 |
| <b>2-pyrrolidinone</b>                                   | Xenobiotics            | Chemical                                             | 0.09  | 0.63 | 0.94 |
| <b>isobutyrylcarnitine (C4)</b>                          | Amino Acid             | Leucine, Isoleucine and Valine Metabolism            | -0.06 | 0.63 | 0.94 |
| <b>4-androsten-3beta,17beta-diol disulfate (1)</b>       | Lipid                  | Steroid                                              | 0.10  | 0.63 | 0.94 |
| <b>pyridoxal</b>                                         | Cofactors and Vitamins | Vitamin B6 Metabolism                                | -0.17 | 0.63 | 0.94 |
| <b>TLdm18:1n7 (plasmalogen vaccenic acid)</b>            | Lipid                  | Mole % Total Fatty Acid                              | 0.10  | 0.64 | 0.94 |
| <b>N2,N5-diacetylornithine</b>                           | Amino Acid             | Urea cycle; Arginine and Proline Metabolism          | -0.10 | 0.64 | 0.94 |
| <b>1-methylguanosine</b>                                 | Nucleotide             | Purine Metabolism, Guanine containing                | -0.02 | 0.64 | 0.94 |
| <b>threonine</b>                                         | Amino Acid             | Glycine, Serine and Threonine Metabolism             | -0.03 | 0.64 | 0.94 |
| <b>isovalerylglycine</b>                                 | Amino Acid             | Leucine, Isoleucine and Valine Metabolism            | 0.06  | 0.65 | 0.95 |
| <b>N-acetylalanine</b>                                   | Amino Acid             | Alanine and Aspartate Metabolism                     | 0.02  | 0.65 | 0.95 |
| <b>aspartylleucine</b>                                   | Peptide                | Dipeptide                                            | -0.07 | 0.65 | 0.95 |
| <b>aspartate</b>                                         | Amino Acid             | Alanine and Aspartate Metabolism                     | 0.05  | 0.65 | 0.95 |
| <b>decanoylcarnitine (C10)</b>                           | Lipid                  | Fatty Acid Metabolism(Acyl Carnitine)                | -0.04 | 0.65 | 0.95 |
| <b>gamma-glutamylglutamine</b>                           | Peptide                | Gamma-glutamyl Amino Acid                            | -0.04 | 0.65 | 0.95 |
| <b>valerylcarnitine (C5)</b>                             | Lipid                  | Fatty Acid Metabolism(Acyl Carnitine)                | -0.17 | 0.66 | 0.95 |
| <b>ADSGEGDFXAEGGGVR*</b>                                 | Peptide                | Fibrinogen Cleavage Peptide                          | 0.04  | 0.66 | 0.95 |
| <b>cinnamoylglycine</b>                                  | Xenobiotics            | Food Component/Plant                                 | 0.22  | 0.66 | 0.95 |
| <b>myristoleoyl sphingomyelin*</b>                       | Lipid                  | Sphingolipid Metabolism                              | -0.05 | 0.66 | 0.95 |

|                                                              |              |                                             |       |      |      |
|--------------------------------------------------------------|--------------|---------------------------------------------|-------|------|------|
| <b>1-methylurate</b>                                         | Xenobiotics  | Xanthine Metabolism                         | -0.11 | 0.67 | 0.95 |
| <b>andro steroid monosulfate (1)*</b>                        | Lipid        | Steroid                                     | -0.12 | 0.67 | 0.95 |
| <b>phenol sulfate</b>                                        | Amino Acid   | Phenylalanine and Tyrosine Metabolism       | 0.12  | 0.67 | 0.95 |
| <b>palmitoleate (16:1n7)</b>                                 | Lipid        | Long Chain Fatty Acid                       | 0.05  | 0.67 | 0.95 |
| <b>N-acetylhistidine</b>                                     | Amino Acid   | Histidine Metabolism                        | -0.09 | 0.67 | 0.95 |
| <b>N-acetylcitrulline</b>                                    | Amino Acid   | Urea cycle; Arginine and Proline Metabolism | -0.11 | 0.67 | 0.95 |
| <b>pregnen-diol disulfate*</b>                               | Lipid        | Steroid                                     | 0.07  | 0.67 | 0.95 |
| <b>3-hydroxylaurate</b>                                      | Lipid        | Fatty Acid, Monohydroxy                     | -0.04 | 0.67 | 0.95 |
| <b>indoleacetate</b>                                         | Amino Acid   | Tryptophan Metabolism                       | 0.05  | 0.68 | 0.95 |
| <b>5alpha-pregnan-3(alpha or beta),20beta-diol disulfate</b> | Lipid        | Steroid                                     | -0.21 | 0.68 | 0.95 |
| <b>pelargonate (9:0)</b>                                     | Lipid        | Medium Chain Fatty Acid                     | -0.02 | 0.68 | 0.95 |
| <b>deoxycarnitine</b>                                        | Lipid        | Carnitine Metabolism                        | -0.02 | 0.68 | 0.95 |
| <b>glucarate 1,4-lactone</b>                                 | Carbohydrate | Disaccharides and Oligosaccharides          | -0.29 | 0.68 | 0.95 |
| <b>guanosine</b>                                             | Nucleotide   | Purine Metabolism, Guanine containing       | -0.14 | 0.68 | 0.95 |
| <b>proline</b>                                               | Amino Acid   | Urea cycle; Arginine and Proline Metabolism | 0.02  | 0.68 | 0.95 |
| <b>1-palmitoyl-GPI* (16:0)*</b>                              | Lipid        | Lysolipid                                   | 0.06  | 0.68 | 0.95 |
| <b>glycerophosphorylcholine (GPC)</b>                        | Lipid        | Phospholipid Metabolism                     | 0.03  | 0.69 | 0.95 |
| <b>taurocholate</b>                                          | Lipid        | Primary Bile Acid Metabolism                | 0.15  | 0.69 | 0.95 |
| <b>2-hydroxyhippurate (salicylurate)</b>                     | Xenobiotics  | Benzoate Metabolism                         | 0.16  | 0.69 | 0.95 |
| <b>TL22:0 (behenic acid)</b>                                 | Lipid        | Mole % Total Fatty Acid                     | -0.04 | 0.69 | 0.96 |
| <b>hydroxyproline</b>                                        | Amino Acid   | Urea cycle; Arginine and Proline Metabolism | 0.05  | 0.70 | 0.96 |
| <b>3-hydroxypyridine sulfate</b>                             | Xenobiotics  | Chemical                                    | 0.11  | 0.70 | 0.96 |
| <b>4-ethylphenyl sulfate</b>                                 | Xenobiotics  | Benzoate Metabolism                         | 0.09  | 0.70 | 0.96 |
| <b>myristoleoylcarnitine*</b>                                | Lipid        | Fatty Acid Metabolism(Acyl Carnitine)       | 0.06  | 0.70 | 0.96 |
| <b>isovalerylcarnitine (C5)</b>                              | Amino Acid   | Leucine, Isoleucine and Valine Metabolism   | -0.04 | 0.71 | 0.96 |
| <b>citrulline</b>                                            | Amino Acid   | Urea cycle; Arginine and Proline Metabolism | -0.03 | 0.71 | 0.96 |
| <b>glycerol</b>                                              | Lipid        | Glycerolipid Metabolism                     | 0.03  | 0.71 | 0.96 |
| <b>lathosterol</b>                                           | Lipid        | Sterol                                      | 0.06  | 0.71 | 0.96 |
| <b>beta-hydroxyisovaleroylcarnitine</b>                      | Amino Acid   | Leucine, Isoleucine and Valine Metabolism   | -0.03 | 0.71 | 0.96 |
| <b>TL24:0 (lignoceric acid)</b>                              | Lipid        | Mole % Total Fatty Acid                     | 0.05  | 0.71 | 0.96 |
| <b>campesterol</b>                                           | Lipid        | Sterol                                      | 0.05  | 0.72 | 0.96 |
| <b>ursodeoxycholate</b>                                      | Lipid        | Secondary Bile Acid Metabolism              | 0.14  | 0.72 | 0.96 |
| <b>gamma-glutamyltryptophan</b>                              | Peptide      | Gamma-glutamyl Amino Acid                   | 0.03  | 0.72 | 0.96 |
| <b>TLdm18:1n9 (plasmalogen oleic acid)</b>                   | Lipid        | Mole % Total Fatty Acid                     | 0.04  | 0.72 | 0.96 |

|                                                    |                        |                                                      |       |      |      |
|----------------------------------------------------|------------------------|------------------------------------------------------|-------|------|------|
| <b>2-hydroxydecanoate</b>                          | Lipid                  | Fatty Acid, Monohydroxy                              | 0.04  | 0.72 | 0.96 |
| <b>N2-acetyllysine</b>                             | Amino Acid             | Lysine Metabolism                                    | -0.06 | 0.72 | 0.96 |
| <b>acetoacetate</b>                                | Lipid                  | Ketone Bodies                                        | -0.05 | 0.73 | 0.96 |
| <b>kynurenine</b>                                  | Amino Acid             | Tryptophan Metabolism                                | 0.02  | 0.73 | 0.96 |
| <b>myo-inositol</b>                                | Lipid                  | Inositol Metabolism                                  | 0.02  | 0.73 | 0.96 |
| <b>guanidinoacetate</b>                            | Amino Acid             | Creatine Metabolism                                  | 0.03  | 0.73 | 0.96 |
| <b>linoleate (18:2n6)</b>                          | Lipid                  | Polyunsaturated Fatty Acid (n3 and n6)               | 0.02  | 0.73 | 0.96 |
| <b>glycolate (hydroxyacetate)</b>                  | Xenobiotics            | Chemical                                             | -0.02 | 0.73 | 0.96 |
| <b>dihomolinolenate (20:3n3 or 3n6)</b>            | Lipid                  | Polyunsaturated Fatty Acid (n3 and n6)               | 0.02  | 0.73 | 0.96 |
| <b>pipecolate</b>                                  | Amino Acid             | Lysine Metabolism                                    | -0.05 | 0.73 | 0.96 |
| <b>valine</b>                                      | Amino Acid             | Leucine, Isoleucine and Valine Metabolism            | -0.01 | 0.74 | 0.96 |
| <b>ectoine</b>                                     | Xenobiotics            | Chemical                                             | 0.09  | 0.74 | 0.96 |
| <b>hypoxanthine</b>                                | Nucleotide             | Purine Metabolism, (Hypo)Xanthine/Inosine containing | -0.06 | 0.74 | 0.96 |
| <b>squalene</b>                                    | Lipid                  | Sterol                                               | 0.10  | 0.74 | 0.96 |
| <b>C-glycosyltryptophan</b>                        | Amino Acid             | Tryptophan Metabolism                                | 0.02  | 0.74 | 0.96 |
| <b>TL16:0 (palmitic acid)</b>                      | Lipid                  | Mole % Total Fatty Acid                              | 0.01  | 0.74 | 0.96 |
| <b>quinolinate</b>                                 | Cofactors and Vitamins | Nicotinate and Nicotinamide Metabolism               | 0.05  | 0.74 | 0.96 |
| <b>3,7-dimethylurate</b>                           | Xenobiotics            | Xanthine Metabolism                                  | -0.11 | 0.74 | 0.96 |
| <b>alpha-hydroxyisocaproate</b>                    | Amino Acid             | Leucine, Isoleucine and Valine Metabolism            | -0.03 | 0.74 | 0.96 |
| <b>coprostanol</b>                                 | Lipid                  | Sterol                                               | 0.10  | 0.75 | 0.96 |
| <b>glycoursodeoxycholate</b>                       | Lipid                  | Secondary Bile Acid Metabolism                       | 0.11  | 0.75 | 0.96 |
| <b>stachydrine</b>                                 | Xenobiotics            | Food Component/Plant                                 | -0.10 | 0.75 | 0.96 |
| <b>quinat</b>                                      | Xenobiotics            | Food Component/Plant                                 | 0.16  | 0.75 | 0.96 |
| <b>bilirubin</b>                                   | Cofactors and Vitamins | Hemoglobin and Porphyrin Metabolism                  | 0.09  | 0.75 | 0.96 |
| <b>acetylcarnitine (C2)</b>                        | Lipid                  | Fatty Acid Metabolism(Acyl Carnitine)                | -0.03 | 0.75 | 0.96 |
| <b>cys-gly, oxidized</b>                           | Amino Acid             | Glutathione Metabolism                               | -0.06 | 0.75 | 0.96 |
| <b>TL20:4n3 (eicosatetraenoic acid)</b>            | Lipid                  | Mole % Total Fatty Acid                              | 0.04  | 0.75 | 0.96 |
| <b>eicosanodioate</b>                              | Lipid                  | Fatty Acid, Dicarboxylate                            | -0.04 | 0.76 | 0.96 |
| <b>indole-3-carboxylic acid</b>                    | Amino Acid             | Tryptophan Metabolism                                | -0.02 | 0.76 | 0.96 |
| <b>adenosine 3',5'-cyclic monophosphate (cAMP)</b> | Nucleotide             | Purine Metabolism, Adenine containing                | -0.07 | 0.76 | 0.96 |
| <b>glutarate (pentanedioate)</b>                   | Amino Acid             | Lysine Metabolism                                    | 0.05  | 0.76 | 0.96 |
| <b>etiocholanolone glucuronide</b>                 | Lipid                  | Steroid                                              | -0.08 | 0.77 | 0.96 |
| <b>N2,N2-dimethylguanosine</b>                     | Nucleotide             | Purine Metabolism, Guanine containing                | 0.02  | 0.77 | 0.96 |
| <b>xylose</b>                                      | Carbohydrate           | Pentose Metabolism                                   | 0.06  | 0.77 | 0.96 |

|                                                      |              |                                                      |       |      |      |
|------------------------------------------------------|--------------|------------------------------------------------------|-------|------|------|
| <b>4-allylphenol sulfate</b>                         | Xenobiotics  | Food Component/Plant                                 | 0.07  | 0.77 | 0.96 |
| <b>palmitoyl-oleoyl-glycerophosphocholine (1)*</b>   | Lipid        | Lysolipid                                            | 0.02  | 0.77 | 0.96 |
| <b>taurodeoxycholate</b>                             | Lipid        | Secondary Bile Acid Metabolism                       | 0.13  | 0.77 | 0.96 |
| <b>docosatienoate (22:3n3)</b>                       | Lipid        | Polyunsaturated Fatty Acid (n3 and n6)               | 0.03  | 0.77 | 0.96 |
| <b>adenine</b>                                       | Nucleotide   | Purine Metabolism, Adenine containing                | 0.04  | 0.77 | 0.96 |
| <b>hexanoylcarnitine (C6)</b>                        | Lipid        | Fatty Acid Metabolism(Acyl Carnitine)                | -0.02 | 0.78 | 0.96 |
| <b>3-hydroxymyristate</b>                            | Lipid        | Fatty Acid, Monohydroxy                              | -0.03 | 0.78 | 0.96 |
| <b>salicylate</b>                                    | Xenobiotics  | Drug                                                 | 0.12  | 0.78 | 0.96 |
| <b>3-methylglutarylcarnitine (1)</b>                 | Amino Acid   | Lysine Metabolism                                    | -0.04 | 0.78 | 0.96 |
| <b>palmitoyl ethanolamide</b>                        | Lipid        | Endocannabinoid                                      | -0.02 | 0.78 | 0.96 |
| <b>1-docosapentaenoyl-GPC* (22:5n6)*</b>             | Lipid        | Lysolipid                                            | -0.09 | 0.78 | 0.96 |
| <b>palmitoleoyl sphingomyelin*</b>                   | Lipid        | Sphingolipid Metabolism                              | 0.01  | 0.79 | 0.96 |
| <b>1-pentadecanoylglycerol (1-monopentadecanoin)</b> | Lipid        | Monoacylglycerol                                     | -0.03 | 0.79 | 0.96 |
| <b>pentadecanoate (15:0)</b>                         | Lipid        | Long Chain Fatty Acid                                | 0.02  | 0.79 | 0.97 |
| <b>glycodeoxycholate</b>                             | Lipid        | Secondary Bile Acid Metabolism                       | 0.11  | 0.79 | 0.97 |
| <b>gamma-glutamylhistidine</b>                       | Peptide      | Gamma-glutamyl Amino Acid                            | 0.06  | 0.80 | 0.97 |
| <b>scyllo-inositol</b>                               | Lipid        | Inositol Metabolism                                  | -0.04 | 0.80 | 0.97 |
| <b>2-stearoylglycerophosphoinositol*</b>             | Lipid        | Lysolipid                                            | -0.04 | 0.80 | 0.97 |
| <b>cystine</b>                                       | Amino Acid   | Methionine, Cysteine, SAM and Taurine Metabolism     | 0.01  | 0.81 | 0.97 |
| <b>cortisone</b>                                     | Lipid        | Steroid                                              | -0.04 | 0.81 | 0.97 |
| <b>glycerate</b>                                     | Carbohydrate | Glycolysis, Gluconeogenesis, and Pyruvate Metabolism | -0.02 | 0.81 | 0.97 |
| <b>4-ureidobutyrate</b>                              | Nucleotide   | Pyrimidine Metabolism, Uracil containing             | -0.04 | 0.81 | 0.97 |
| <b>histidine</b>                                     | Amino Acid   | Histidine Metabolism                                 | -0.02 | 0.81 | 0.97 |
| <b>stearoyl-linoleoyl-glycerophosphocholine (1)*</b> | Lipid        | Lysolipid                                            | 0.02  | 0.82 | 0.97 |
| <b>imidazole propionate</b>                          | Amino Acid   | Histidine Metabolism                                 | 0.04  | 0.82 | 0.97 |
| <b>pregn steroid monosulfate*</b>                    | Lipid        | Steroid                                              | 0.03  | 0.82 | 0.97 |
| <b>creatinine</b>                                    | Amino Acid   | Creatine Metabolism                                  | 0.01  | 0.82 | 0.97 |
| <b>2-hydroxyglutarate</b>                            | Lipid        | Fatty Acid, Dicarboxylate                            | -0.02 | 0.82 | 0.97 |
| <b>phenylalanyltryptophan</b>                        | Peptide      | Dipeptide                                            | 0.04  | 0.82 | 0.97 |
| <b>13-HODE + 9-HODE</b>                              | Lipid        | Fatty Acid, Monohydroxy                              | -0.03 | 0.83 | 0.97 |
| <b>N-(2-furoyl)glycine</b>                           | Xenobiotics  | Food Component/Plant                                 | 0.04  | 0.83 | 0.97 |
| <b>21-hydroxypregnenolone disulfate</b>              | Lipid        | Steroid                                              | 0.04  | 0.83 | 0.97 |
| <b>beta-sitosterol</b>                               | Lipid        | Sterol                                               | 0.03  | 0.83 | 0.97 |
| <b>TLdm16:0 (plasmalogen palmitic acid)</b>          | Lipid        | Mole % Total Fatty Acid                              | -0.02 | 0.83 | 0.97 |

|                                                           |                        |                                                      |       |      |      |
|-----------------------------------------------------------|------------------------|------------------------------------------------------|-------|------|------|
| <b>caprate (10:0)</b>                                     | Lipid                  | Medium Chain Fatty Acid                              | -0.02 | 0.83 | 0.97 |
| <b>xylonate</b>                                           | Carbohydrate           | Pentose Metabolism                                   | 0.04  | 0.83 | 0.97 |
| <b>p-cresol sulfate</b>                                   | Amino Acid             | Phenylalanine and Tyrosine Metabolism                | 0.06  | 0.84 | 0.97 |
| <b>N3-methyluridine</b>                                   | Nucleotide             | Pyrimidine Metabolism, Uracil containing             | 0.03  | 0.84 | 0.97 |
| <b>arginine</b>                                           | Amino Acid             | Urea cycle; Arginine and Proline Metabolism          | -0.01 | 0.84 | 0.97 |
| <b>TL15:0 (pentadecanoic acid)</b>                        | Lipid                  | Mole % Total Fatty Acid                              | -0.01 | 0.84 | 0.97 |
| <b>2-methylbutyrocarnitine (C5)</b>                       | Amino Acid             | Leucine, Isoleucine and Valine Metabolism            | 0.02  | 0.84 | 0.97 |
| <b>thymol sulfate</b>                                     | Xenobiotics            | Food Component/Plant                                 | 0.09  | 0.84 | 0.97 |
| <b>gamma-glutamyltyrosine</b>                             | Peptide                | Gamma-glutamyl Amino Acid                            | -0.01 | 0.84 | 0.97 |
| <b>dehydroisoandrosterone sulfate (DHEA-S)</b>            | Lipid                  | Steroid                                              | 0.04  | 0.84 | 0.97 |
| <b>stearoyl-linoleoyl-glycerophosphocholine (2)*</b>      | Lipid                  | Lysolipid                                            | -0.02 | 0.84 | 0.97 |
| <b>O-sulfo-L-tyrosine</b>                                 | Xenobiotics            | Chemical                                             | 0.01  | 0.84 | 0.97 |
| <b>3-phenylpropionate (hydrocinnamate)</b>                | Amino Acid             | Phenylalanine and Tyrosine Metabolism                | 0.06  | 0.85 | 0.97 |
| <b>cholate</b>                                            | Lipid                  | Primary Bile Acid Metabolism                         | 0.07  | 0.85 | 0.97 |
| <b>stearoyl-linoleoyl-glycerophosphoethanolamine (1)*</b> | Lipid                  | Lysolipid                                            | -0.02 | 0.85 | 0.97 |
| <b>pregnanediol-3-glucuronide</b>                         | Lipid                  | Steroid                                              | -0.06 | 0.85 | 0.97 |
| <b>glycolithocholate</b>                                  | Lipid                  | Secondary Bile Acid Metabolism                       | -0.08 | 0.85 | 0.98 |
| <b>tryptophan</b>                                         | Amino Acid             | Tryptophan Metabolism                                | 0.01  | 0.86 | 0.98 |
| <b>N-acetylarginine</b>                                   | Amino Acid             | Urea cycle; Arginine and Proline Metabolism          | -0.02 | 0.86 | 0.98 |
| <b>tiglyl carnitine (C5)</b>                              | Amino Acid             | Leucine, Isoleucine and Valine Metabolism            | 0.02  | 0.86 | 0.98 |
| <b>palmitoyl-palmitoyl-glycerophosphocholine (1)*</b>     | Lipid                  | Lysolipid                                            | -0.02 | 0.87 | 0.98 |
| <b>vaccenate (18:1n7)</b>                                 | Lipid                  | Long Chain Fatty Acid                                | 0.01  | 0.87 | 0.98 |
| <b>taurochenodeoxycholate</b>                             | Lipid                  | Primary Bile Acid Metabolism                         | 0.05  | 0.87 | 0.98 |
| <b>cholesterol</b>                                        | Lipid                  | Sterol                                               | -0.01 | 0.87 | 0.98 |
| <b>serotonin (5HT)</b>                                    | Amino Acid             | Tryptophan Metabolism                                | 0.04  | 0.87 | 0.98 |
| <b>palmitoyl-arachidonoyl-glycerophosphocholine (1)*</b>  | Lipid                  | Lysolipid                                            | 0.02  | 0.87 | 0.98 |
| <b>urate</b>                                              | Nucleotide             | Purine Metabolism, (Hypo)Xanthine/Inosine containing | -0.01 | 0.87 | 0.98 |
| <b>tyramine O-sulfate</b>                                 | Amino Acid             | Phenylalanine and Tyrosine Metabolism                | 0.04  | 0.87 | 0.98 |
| <b>pyrraline</b>                                          | Xenobiotics            | Food Component/Plant                                 | -0.04 | 0.88 | 0.98 |
| <b>N-acetyltyrosine</b>                                   | Amino Acid             | Phenylalanine and Tyrosine Metabolism                | -0.02 | 0.88 | 0.98 |
| <b>pyridoxate</b>                                         | Cofactors and Vitamins | Vitamin B6 Metabolism                                | -0.03 | 0.88 | 0.98 |

|                                                        |                        |                                                  |        |      |      |
|--------------------------------------------------------|------------------------|--------------------------------------------------|--------|------|------|
| <b>dimethylglycine</b>                                 | Amino Acid             | Glycine, Serine and Threonine Metabolism         | 0.01   | 0.88 | 0.98 |
| <b>7-methylguanine</b>                                 | Nucleotide             | Purine Metabolism, Guanine containing            | -0.01  | 0.88 | 0.98 |
| <b>phenylalanylglutamate</b>                           | Peptide                | Dipeptide                                        | 0.07   | 0.89 | 0.98 |
| <b>13-methylmyristic acid</b>                          | Lipid                  | Fatty Acid, Branched                             | 0.01   | 0.89 | 0.98 |
| <b>N-acetyl-beta-alanine</b>                           | Nucleotide             | Pyrimidine Metabolism, Uracil containing         | -0.01  | 0.89 | 0.98 |
| <b>4-hydroxybenzoate</b>                               | Xenobiotics            | Benzoate Metabolism                              | 0.06   | 0.89 | 0.98 |
| <b>phenylalanylphenylalanine</b>                       | Peptide                | Dipeptide                                        | 0.02   | 0.89 | 0.98 |
| <b>levulinate (4-oxovalerate)</b>                      | Xenobiotics            | Food Component/Plant                             | -0.01  | 0.89 | 0.98 |
| <b>N-acetyl-1-methylhistidine*</b>                     | Amino Acid             | Histidine Metabolism                             | -0.02  | 0.90 | 0.98 |
| <b>7-methylxanthine</b>                                | Xenobiotics            | Xanthine Metabolism                              | -0.04  | 0.90 | 0.98 |
| <b>propionylcarnitine (C3)</b>                         | Lipid                  | Fatty Acid Metabolism (also BCAA Metabolism)     | 0.01   | 0.90 | 0.98 |
| <b>TL18:1n7 (avaccenic acid)</b>                       | Lipid                  | Mole % Total Fatty Acid                          | 0.01   | 0.90 | 0.99 |
| <b>S-adenosylhomocysteine (SAH)</b>                    | Amino Acid             | Methionine, Cysteine, SAM and Taurine Metabolism | 0.02   | 0.90 | 0.99 |
| <b>5-acetylamino-6-amino-3-methyluracil</b>            | Xenobiotics            | Xanthine Metabolism                              | 0.05   | 0.91 | 0.99 |
| <b>homoarginine</b>                                    | Amino Acid             | Urea cycle; Arginine and Proline Metabolism      | 0.03   | 0.91 | 0.99 |
| <b>chenodeoxycholate</b>                               | Lipid                  | Primary Bile Acid Metabolism                     | 0.03   | 0.91 | 0.99 |
| <b>5-dodecenoate (12:1n7)</b>                          | Lipid                  | Medium Chain Fatty Acid                          | -0.01  | 0.91 | 0.99 |
| <b>2-linoleoylglycerol (2-monolinolein)</b>            | Lipid                  | Monoacylglycerol                                 | 0.02   | 0.92 | 0.99 |
| <b>laurylcarnitine (C12)</b>                           | Lipid                  | Fatty Acid Metabolism(Acyl Carnitine)            | 0.01   | 0.92 | 0.99 |
| <b>gamma-glutamylthreonine*</b>                        | Peptide                | Gamma-glutamyl Amino Acid                        | 0.01   | 0.92 | 0.99 |
| <b>myristoleate (14:1n5)</b>                           | Lipid                  | Long Chain Fatty Acid                            | -0.02  | 0.92 | 0.99 |
| <b>oleoyl-linoleoyl-glycerophosphocholine (2)*</b>     | Lipid                  | Lysolipid                                        | 0.01   | 0.92 | 0.99 |
| <b>4-androsten-3alpha,17alpha-diol monosulfate (3)</b> | Lipid                  | Steroid                                          | -0.02  | 0.92 | 0.99 |
| <b>N1-Methyl-2-pyridone-5-carboxamide</b>              | Cofactors and Vitamins | Nicotinate and Nicotinamide Metabolism           | 0.01   | 0.92 | 0.99 |
| <b>gentisate</b>                                       | Amino Acid             | Phenylalanine and Tyrosine Metabolism            | -0.04  | 0.93 | 0.99 |
| <b>p-cresol-glucuronide*</b>                           | Amino Acid             | Phenylalanine and Tyrosine Metabolism            | -0.04  | 0.93 | 0.99 |
| <b>N-acetylkynurenine (2)</b>                          | Amino Acid             | Tryptophan Metabolism                            | 0.03   | 0.93 | 0.99 |
| <b>ribonate (ribonolactone)</b>                        | Carbohydrate           | Pentose Metabolism                               | 0.01   | 0.93 | 0.99 |
| <b>oleate (18:1n9)</b>                                 | Lipid                  | Long Chain Fatty Acid                            | 0.01   | 0.93 | 0.99 |
| <b>isoleucine</b>                                      | Amino Acid             | Leucine, Isoleucine and Valine Metabolism        | -0.004 | 0.93 | 0.99 |
| <b>pyroglutamylglycine</b>                             | Peptide                | Dipeptide                                        | 0.02   | 0.94 | 0.99 |
| <b>N-acetylphenylalanine</b>                           | Amino Acid             | Phenylalanine and Tyrosine Metabolism            | -0.01  | 0.94 | 0.99 |
| <b>hippurate</b>                                       | Xenobiotics            | Benzoate Metabolism                              | 0.02   | 0.94 | 0.99 |

|                                                            |                        |                                            |        |      |      |
|------------------------------------------------------------|------------------------|--------------------------------------------|--------|------|------|
| <b>palmitoyl sphingomyelin</b>                             | Lipid                  | Sphingolipid Metabolism                    | 0.003  | 0.94 | 0.99 |
| <b>cortisol</b>                                            | Lipid                  | Steroid                                    | 0.01   | 0.94 | 0.99 |
| <b>2-aminophenol sulfate</b>                               | Xenobiotics            | Chemical                                   | -0.02  | 0.94 | 0.99 |
| <b>nicotinamide</b>                                        | Cofactors and Vitamins | Nicotinate and Nicotinamide Metabolism     | 0.01   | 0.94 | 0.99 |
| <b>succinylcarnitine (C4)</b>                              | Energy                 | TCA Cycle                                  | 0.01   | 0.95 | 0.99 |
| <b>laurate (12:0)</b>                                      | Lipid                  | Medium Chain Fatty Acid                    | 0.01   | 0.95 | 0.99 |
| <b>tartarate</b>                                           | Xenobiotics            | Food Component/Plant                       | -0.02  | 0.95 | 0.99 |
| <b>histidylphenylalanine</b>                               | Peptide                | Dipeptide                                  | 0.02   | 0.95 | 0.99 |
| <b>N-acetylglutamate</b>                                   | Amino Acid             | Glutamate Metabolism                       | 0.01   | 0.95 | 0.99 |
| <b>phenylalanine</b>                                       | Amino Acid             | Phenylalanine and Tyrosine Metabolism      | -0.002 | 0.95 | 0.99 |
| <b>4-androsten-3alpha,17alpha-diol monosulfate (2)</b>     | Lipid                  | Steroid                                    | -0.01  | 0.96 | 0.99 |
| <b>3-methylxanthine</b>                                    | Xenobiotics            | Xanthine Metabolism                        | -0.02  | 0.96 | 0.99 |
| <b>trans-urocanate</b>                                     | Amino Acid             | Histidine Metabolism                       | 0.01   | 0.96 | 0.99 |
| <b>5alpha-androstan-3alpha,17beta-diol monosulfate (1)</b> | Lipid                  | Steroid                                    | 0.02   | 0.96 | 0.99 |
| <b>DSGEGDFXAEGGGVR*</b>                                    | Peptide                | Fibrinogen Cleavage Peptide                | -0.01  | 0.97 | 1.00 |
| <b>N-6-trimethyllysine</b>                                 | Amino Acid             | Lysine Metabolism                          | -0.004 | 0.97 | 1.00 |
| <b>piperine</b>                                            | Xenobiotics            | Food Component/Plant                       | -0.01  | 0.97 | 1.00 |
| <b>5-hydroxyindoleacetate</b>                              | Amino Acid             | Tryptophan Metabolism                      | -0.003 | 0.97 | 1.00 |
| <b>deoxycholate</b>                                        | Lipid                  | Secondary Bile Acid Metabolism             | 0.01   | 0.98 | 1.00 |
| <b>phosphate</b>                                           | Energy                 | Oxidative Phosphorylation                  | -0.001 | 0.98 | 1.00 |
| <b>TLdm18:0 (plasmalogen stearic acid)</b>                 | Lipid                  | Mole % Total Fatty Acid                    | -0.002 | 0.98 | 1.00 |
| <b>1-methylxanthine</b>                                    | Xenobiotics            | Xanthine Metabolism                        | -0.01  | 0.98 | 1.00 |
| <b>N6-carbamoylthreonyladenosine</b>                       | Nucleotide             | Purine Metabolism, Adenine containing      | 0.002  | 0.98 | 1.00 |
| <b>leucine</b>                                             | Amino Acid             | Leucine, Isoleucine and Valine Metabolism  | 0.001  | 0.98 | 1.00 |
| <b>1-stearoyl-GPI (18:0)</b>                               | Lipid                  | Lysolipid                                  | 0.002  | 0.99 | 1.00 |
| <b>sphingosine 1-phosphate</b>                             | Lipid                  | Sphingolipid Metabolism                    | 0.001  | 0.99 | 1.00 |
| <b>carnitine</b>                                           | Lipid                  | Carnitine Metabolism                       | -0.001 | 0.99 | 1.00 |
| <b>epiandrosterone sulfate</b>                             | Lipid                  | Steroid                                    | 0.004  | 0.99 | 1.00 |
| <b>galactonate</b>                                         | Carbohydrate           | Fructose, Mannose and Galactose Metabolism | 0.01   | 0.99 | 1.00 |
| <b>N-acetylalliin</b>                                      | Xenobiotics            | Food Component/Plant                       | -0.01  | 0.99 | 1.00 |
| <b>4-vinylphenol sulfate</b>                               | Xenobiotics            | Benzoate Metabolism                        | -0.003 | 0.99 | 1.00 |
| <b>tyrosylglutamine</b>                                    | Peptide                | Dipeptide                                  | 0.002  | 0.99 | 1.00 |
| <b>N-acetylthreonine</b>                                   | Amino Acid             | Glycine, Serine and Threonine Metabolism   | 0.001  | 0.99 | 1.00 |
| <b>stigmasterol</b>                                        | Lipid                  | Sterol                                     | -0.001 | 0.99 | 1.00 |



|                       |            |                                           |        |      |      |
|-----------------------|------------|-------------------------------------------|--------|------|------|
| <b>N-acetylvaline</b> | Amino Acid | Leucine, Isoleucine and Valine Metabolism | 0.0003 | 1.00 | 1.00 |
|-----------------------|------------|-------------------------------------------|--------|------|------|

\*Covariates: age, sex, diabetes, hypertension, BMI, and liver fibrosis stage  
TCA = tricarboxylic acid cycle; GPE = Glycerophosphoethanolamine; GPC = Glycerophosphocholine; SAM = S-Adenosyl methionine

**Table S4: HFpEF-no fatigue full results\***

| Metabolite                                       | Pathway     | Sub-Pathway                           | log Fold change | Unadjusted p-value | Adjusted p-value |
|--------------------------------------------------|-------------|---------------------------------------|-----------------|--------------------|------------------|
| 1-arachidonoyl-GPE* (20:4)*                      | Lipid       | Lysolipid                             | 0.27            | 0.0004             | 0.13             |
| azelate (nonanedioate; C9)                       | Lipid       | Fatty Acid, Dicarboxylate             | -0.37           | 0.0006             | 0.13             |
| taurocholenate sulfate                           | Lipid       | Secondary Bile Acid Metabolism        | -0.60           | 0.0008             | 0.13             |
| 1-stearoyl-GPE (18:0)                            | Lipid       | Lysolipid                             | 0.28            | 0.001              | 0.13             |
| 1-arachidonylglycerol                            | Lipid       | Monoacylglycerol                      | 0.30            | 0.001              | 0.13             |
| 1-docosahexaenoylglycerophosphoethanolamine*     | Lipid       | Lysolipid                             | 0.35            | 0.001              | 0.13             |
| 2-stearoylglycerophosphoethanolamine*            | Lipid       | Lysolipid                             | 0.33            | 0.001              | 0.13             |
| 1-oleoyl-GPE (18:1)                              | Lipid       | Lysolipid                             | 0.27            | 0.002              | 0.15             |
| 1-palmitoyl-GPE (16:0)                           | Lipid       | Lysolipid                             | 0.27            | 0.002              | 0.18             |
| 2-arachidonoyl glycerol                          | Lipid       | Monoacylglycerol                      | 0.32            | 0.003              | 0.20             |
| 1-linolenylglycerol                              | Lipid       | Monoacylglycerol                      | 0.34            | 0.004              | 0.25             |
| citrate                                          | Energy      | TCA Cycle                             | -0.20           | 0.005              | 0.26             |
| 2-oleoyl-GPE* (18:1)*                            | Lipid       | Lysolipid                             | 0.85            | 0.007              | 0.37             |
| 7-alpha-hydroxycholesterol                       | Lipid       | Sterol                                | 0.50            | 0.009              | 0.37             |
| 2-palmitoyl-GPE* (16:0)*                         | Lipid       | Lysolipid                             | 0.31            | 0.009              | 0.37             |
| 1-eicosatrienoylglycerophosphoethanolamine*      | Lipid       | Lysolipid                             | 0.65            | 0.009              | 0.37             |
| N2-methylguanosine                               | Nucleotide  | Purine Metabolism, Guanine containing | 0.28            | 0.01               | 0.37             |
| alpha-ketoglutarate                              | Energy      | TCA Cycle                             | 0.29            | 0.01               | 0.37             |
| 2-arachidonoyl-GPE* (20:4)*                      | Lipid       | Lysolipid                             | 0.50            | 0.01               | 0.39             |
| 1-docosahexaenoylglycerol                        | Lipid       | Monoacylglycerol                      | 0.36            | 0.01               | 0.39             |
| TL18:3n6 (g-linolenic acid)                      | Lipid       | Mole % Total Fatty Acid               | 0.22            | 0.01               | 0.41             |
| 2-docosahexaenoylglycerol*                       | Lipid       | Monoacylglycerol                      | 0.85            | 0.01               | 0.44             |
| glycerophosphoethanolamine                       | Lipid       | Phospholipid Metabolism               | 0.38            | 0.02               | 0.52             |
| hexanoylglycine (C6)                             | Lipid       | Fatty Acid Metabolism(Acyl Glycine)   | 0.76            | 0.02               | 0.53             |
| N6-acetyllysine                                  | Amino Acid  | Lysine Metabolism                     | 0.12            | 0.02               | 0.54             |
| methyl glucopyranoside (alpha + beta)            | Xenobiotics | Food Component/Plant                  | -0.72           | 0.02               | 0.59             |
| glutamine                                        | Amino Acid  | Glutamate Metabolism                  | -0.09           | 0.02               | 0.59             |
| 5alpha-pregnan-3beta,20beta-diol monosulfate (1) | Lipid       | Steroid                               | -0.54           | 0.03               | 0.59             |
| 2-palmitoylglycerol (16:0)                       | Lipid       | Monoacylglycerol                      | 0.36            | 0.03               | 0.59             |
| TL14:0 (myristic acid)                           | Lipid       | Mole % Total Fatty Acid               | 0.23            | 0.03               | 0.59             |

|                                                              |                        |                                                      |       |      |      |
|--------------------------------------------------------------|------------------------|------------------------------------------------------|-------|------|------|
| <b>pyruvate</b>                                              | Carbohydrate           | Glycolysis, Gluconeogenesis, and Pyruvate Metabolism | 0.33  | 0.03 | 0.59 |
| <b>N-delta-acetylornithine</b>                               | Amino Acid             | Urea cycle; Arginine and Proline Metabolism          | 0.33  | 0.03 | 0.59 |
| <b>1-linoleoylglycerol (18:2)</b>                            | Lipid                  | Monoacylglycerol                                     | 0.24  | 0.03 | 0.59 |
| <b>1-myristoyl-GPC (14:0)</b>                                | Lipid                  | Lysolipid                                            | 0.32  | 0.03 | 0.59 |
| <b>3b-hydroxy-5-choleonoic acid</b>                          | Lipid                  | Secondary Bile Acid Metabolism                       | -0.57 | 0.03 | 0.59 |
| <b>arabinose</b>                                             | Carbohydrate           | Pentose Metabolism                                   | 0.49  | 0.03 | 0.59 |
| <b>benzoate</b>                                              | Xenobiotics            | Benzoate Metabolism                                  | -0.16 | 0.04 | 0.59 |
| <b>1-palmitoylglycerol (16:0)</b>                            | Lipid                  | Monoacylglycerol                                     | 0.21  | 0.04 | 0.59 |
| <b>phenylpyruvate</b>                                        | Amino Acid             | Phenylalanine and Tyrosine Metabolism                | 0.17  | 0.04 | 0.59 |
| <b>3beta,7alpha-dihydroxy-5-cholestenoate</b>                | Lipid                  | Secondary Bile Acid Metabolism                       | 0.68  | 0.04 | 0.59 |
| <b>2-keto-3-deoxy-gluconate</b>                              | Xenobiotics            | Food Component/Plant                                 | 0.29  | 0.04 | 0.59 |
| <b>1-myristoylglycerol (14:0)</b>                            | Lipid                  | Monoacylglycerol                                     | 0.32  | 0.04 | 0.59 |
| <b>pyridoxine (Vitamin B6)</b>                               | Cofactors and Vitamins | Vitamin B6 Metabolism                                | -0.19 | 0.04 | 0.59 |
| <b>S-methylcysteine</b>                                      | Amino Acid             | Methionine, Cysteine, SAM and Taurine Metabolism     | -0.21 | 0.04 | 0.59 |
| <b>3-methoxytyrosine</b>                                     | Amino Acid             | Phenylalanine and Tyrosine Metabolism                | -0.14 | 0.04 | 0.60 |
| <b>threonine</b>                                             | Amino Acid             | Glycine, Serine and Threonine Metabolism             | -0.12 | 0.04 | 0.60 |
| <b>stearoyl-arachidonoyl-glycerophosphoethanolamine (1)*</b> | Lipid                  | Lysolipid                                            | 0.23  | 0.04 | 0.60 |
| <b>1-dihomo-linolenylglycerol (alpha, gamma)</b>             | Lipid                  | Monoacylglycerol                                     | 0.22  | 0.04 | 0.60 |
| <b>butyrylcarnitine (C4)</b>                                 | Lipid                  | Fatty Acid Metabolism (also BCAA Metabolism)         | 0.24  | 0.05 | 0.60 |
| <b>orotate</b>                                               | Nucleotide             | Pyrimidine Metabolism, Orotate containing            | 0.34  | 0.05 | 0.60 |
| <b>2-oleoylglycerol (18:1)</b>                               | Lipid                  | Monoacylglycerol                                     | 0.24  | 0.05 | 0.64 |
| <b>gamma-CEHC glucuronide*</b>                               | Cofactors and Vitamins | Tocopherol Metabolism                                | 0.63  | 0.05 | 0.64 |
| <b>3-methyl catechol sulfate (1)</b>                         | Xenobiotics            | Benzoate Metabolism                                  | 0.63  | 0.05 | 0.65 |
| <b>eugenol sulfate</b>                                       | Xenobiotics            | Food Component/Plant                                 | 0.83  | 0.05 | 0.65 |
| <b>methionine sulfone</b>                                    | Amino Acid             | Methionine, Cysteine, SAM and Taurine Metabolism     | 0.30  | 0.06 | 0.65 |
| <b>caproate (6:0)</b>                                        | Lipid                  | Medium Chain Fatty Acid                              | -0.12 | 0.06 | 0.65 |
| <b>16a-hydroxy DHEA 3-sulfate</b>                            | Lipid                  | Steroid                                              | -0.37 | 0.06 | 0.65 |
| <b>2-myristoyl-GPC* (14:0)*</b>                              | Lipid                  | Lysolipid                                            | 0.40  | 0.06 | 0.65 |
| <b>4-androsten-3beta,17beta-diol disulfate (2)</b>           | Lipid                  | Steroid                                              | -0.28 | 0.06 | 0.65 |
| <b>indoleacetylglutamine</b>                                 | Amino Acid             | Tryptophan Metabolism                                | 0.64  | 0.06 | 0.65 |
| <b>1-pentadecanoylglycerophosphocholine (15:0)*</b>          | Lipid                  | Lysolipid                                            | 0.20  | 0.06 | 0.65 |

|                                                              |                        |                                                  |       |      |      |
|--------------------------------------------------------------|------------------------|--------------------------------------------------|-------|------|------|
| <b>alpha-hydroxycaproate</b>                                 | Lipid                  | Fatty Acid, Monohydroxy                          | 0.16  | 0.06 | 0.65 |
| <b>cytidine</b>                                              | Nucleotide             | Pyrimidine Metabolism, Cytidine containing       | 0.18  | 0.06 | 0.65 |
| <b>1-oleoylglycerol (18:1)</b>                               | Lipid                  | Monoacylglycerol                                 | 0.22  | 0.07 | 0.66 |
| <b>2-linoleoylglycerol (2-monolinolein)</b>                  | Lipid                  | Monoacylglycerol                                 | 0.29  | 0.07 | 0.66 |
| <b>3-hydroxybutyrate (BHBA)</b>                              | Lipid                  | Ketone Bodies                                    | -0.38 | 0.07 | 0.66 |
| <b>indolebutyrate</b>                                        | Amino Acid             | Tryptophan Metabolism                            | 0.39  | 0.07 | 0.66 |
| <b>beta-alanine</b>                                          | Nucleotide             | Pyrimidine Metabolism, Uracil containing         | -0.19 | 0.07 | 0.66 |
| <b>TL20:3n9 (mead acid)</b>                                  | Lipid                  | Mole % Total Fatty Acid                          | 0.26  | 0.07 | 0.66 |
| <b>5alpha-pregnan-3(alpha or beta),20beta-diol disulfate</b> | Lipid                  | Steroid                                          | -0.94 | 0.07 | 0.66 |
| <b>N-acetylleucine</b>                                       | Amino Acid             | Leucine, Isoleucine and Valine Metabolism        | -0.16 | 0.07 | 0.66 |
| <b>palmitoyl-linoleoyl-glycerophosphocholine (2)*</b>        | Lipid                  | Lysolipid                                        | -0.12 | 0.08 | 0.66 |
| <b>gluconate</b>                                             | Xenobiotics            | Food Component/Plant                             | 0.15  | 0.08 | 0.66 |
| <b>methionine</b>                                            | Amino Acid             | Methionine, Cysteine, SAM and Taurine Metabolism | -0.09 | 0.08 | 0.66 |
| <b>3-(4-hydroxyphenyl)propionate</b>                         | Amino Acid             | Phenylalanine and Tyrosine Metabolism            | -0.70 | 0.08 | 0.66 |
| <b>2-docosahexaenoyl-GPC* (22:6)*</b>                        | Lipid                  | Lysolipid                                        | 0.28  | 0.08 | 0.66 |
| <b>gamma-glutamylglutamine</b>                               | Peptide                | Gamma-glutamyl Amino Acid                        | -0.16 | 0.08 | 0.66 |
| <b>biliverdin</b>                                            | Cofactors and Vitamins | Hemoglobin and Porphyrin Metabolism              | -0.36 | 0.08 | 0.66 |
| <b>1-eicosapentaenoylglycerophosphocholine (20:5n3)*</b>     | Lipid                  | Lysolipid                                        | 0.33  | 0.08 | 0.66 |
| <b>indolepropionate</b>                                      | Amino Acid             | Tryptophan Metabolism                            | -0.35 | 0.09 | 0.66 |
| <b>orotidine</b>                                             | Nucleotide             | Pyrimidine Metabolism, Orotate containing        | 0.40  | 0.09 | 0.66 |
| <b>propionylglycine (C3)</b>                                 | Lipid                  | Fatty Acid Metabolism (also BCAA Metabolism)     | 0.21  | 0.09 | 0.66 |
| <b>2-aminobutyrate</b>                                       | Amino Acid             | Methionine, Cysteine, SAM and Taurine Metabolism | -0.15 | 0.09 | 0.66 |
| <b>methyl indole-3-acetate</b>                               | Xenobiotics            | Food Component/Plant                             | 0.26  | 0.09 | 0.66 |
| <b>2-hydroxyglutarate</b>                                    | Lipid                  | Fatty Acid, Dicarboxylate                        | -0.16 | 0.09 | 0.66 |
| <b>9,10-DiHOME</b>                                           | Lipid                  | Fatty Acid, Dihydroxy                            | -0.38 | 0.09 | 0.66 |
| <b>isobutyrylglycine (C4)</b>                                | Amino Acid             | Leucine, Isoleucine and Valine Metabolism        | 0.20  | 0.09 | 0.66 |
| <b>methionine sulfoxide</b>                                  | Amino Acid             | Methionine, Cysteine, SAM and Taurine Metabolism | -0.15 | 0.09 | 0.66 |
| <b>7-dehydro-cholesterol</b>                                 | Lipid                  | Sterol                                           | 0.63  | 0.09 | 0.66 |
| <b>4-imidazoleacetate</b>                                    | Amino Acid             | Histidine Metabolism                             | -0.46 | 0.09 | 0.66 |
| <b>isovalerylglycine</b>                                     | Amino Acid             | Leucine, Isoleucine and Valine Metabolism        | 0.22  | 0.09 | 0.66 |
| <b>betaine</b>                                               | Amino Acid             | Glycine, Serine and Threonine Metabolism         | -0.11 | 0.09 | 0.66 |
| <b>TL18:2n6 (linoleic acid)</b>                              | Lipid                  | Mole % Total Fatty Acid                          | -0.08 | 0.09 | 0.66 |

|                                                    |              |                                                      |       |      |      |
|----------------------------------------------------|--------------|------------------------------------------------------|-------|------|------|
| <b>1-arachidonoyl-GPC* (20:4)*</b>                 | Lipid        | Lysolipid                                            | 0.16  | 0.10 | 0.66 |
| <b>2-ethylhexanoic acid</b>                        | Xenobiotics  | Chemical                                             | -0.15 | 0.10 | 0.66 |
| <b>TLdm16:0 (plasmalogen palmitic acid)</b>        | Lipid        | Mole % Total Fatty Acid                              | -0.14 | 0.10 | 0.66 |
| <b>1-linolenoylglycerophosphocholine (18:3n3)*</b> | Lipid        | Lysolipid                                            | 0.22  | 0.10 | 0.66 |
| <b>tauroolithocholate 3-sulfate</b>                | Lipid        | Secondary Bile Acid Metabolism                       | -0.58 | 0.10 | 0.66 |
| <b>o-cresol sulfate</b>                            | Amino Acid   | Phenylalanine and Tyrosine Metabolism                | 0.97  | 0.10 | 0.66 |
| <b>glucose</b>                                     | Carbohydrate | Glycolysis, Gluconeogenesis, and Pyruvate Metabolism | 0.10  | 0.10 | 0.66 |
| <b>oleamide</b>                                    | Lipid        | Fatty Acid, Amide                                    | 0.31  | 0.10 | 0.66 |
| <b>dimethylarginine (ADMA + SDMA)</b>              | Amino Acid   | Urea cycle; Arginine and Proline Metabolism          | -0.06 | 0.10 | 0.66 |
| <b>pyroglutamylglutamine</b>                       | Peptide      | Dipeptide                                            | 0.29  | 0.10 | 0.66 |
| <b>N-acetyl-aspartyl-glutamate (NAAG)</b>          | Amino Acid   | Glutamate Metabolism                                 | -0.13 | 0.10 | 0.66 |
| <b>phenylalanylleucine</b>                         | Peptide      | Dipeptide                                            | 0.52  | 0.11 | 0.67 |
| <b>2-hydroxy-3-methylvalerate</b>                  | Amino Acid   | Leucine, Isoleucine and Valine Metabolism            | 0.17  | 0.11 | 0.67 |
| <b>homostachydrine*</b>                            | Xenobiotics  | Food Component/Plant                                 | -0.21 | 0.11 | 0.69 |
| <b>malonate (propanedioate)</b>                    | Lipid        | Fatty Acid Synthesis                                 | -0.26 | 0.11 | 0.69 |
| <b>2-palmitoleoyl-GPC* (16:1)*</b>                 | Lipid        | Lysolipid                                            | 0.31  | 0.12 | 0.71 |
| <b>TL18:4n3 (stearidonic acid)</b>                 | Lipid        | Mole % Total Fatty Acid                              | 0.32  | 0.12 | 0.73 |
| <b>TL18:1n9 (oleic acid)</b>                       | Lipid        | Mole % Total Fatty Acid                              | 0.06  | 0.12 | 0.73 |
| <b>1,2,3-benzenetriol sulfate (2)</b>              | Xenobiotics  | Chemical                                             | -0.75 | 0.12 | 0.73 |
| <b>glycolithocholate sulfate*</b>                  | Lipid        | Secondary Bile Acid Metabolism                       | -0.44 | 0.12 | 0.73 |
| <b>N-acetylglutamate</b>                           | Amino Acid   | Glutamate Metabolism                                 | -0.41 | 0.13 | 0.73 |
| <b>TLdm18:0 (plasmalogen stearic acid)</b>         | Lipid        | Mole % Total Fatty Acid                              | -0.14 | 0.13 | 0.73 |
| <b>TLTL (Total Total Lipid)</b>                    | Lipid        | Quantitative Total Fatty Acid                        | 0.13  | 0.13 | 0.73 |
| <b>N-acetylglutamine</b>                           | Amino Acid   | Glutamate Metabolism                                 | -0.18 | 0.13 | 0.73 |
| <b>stearidonate (18:4n3)</b>                       | Lipid        | Polyunsaturated Fatty Acid (n3 and n6)               | 0.20  | 0.13 | 0.73 |
| <b>galactonate</b>                                 | Carbohydrate | Fructose, Mannose and Galactose Metabolism           | 0.72  | 0.13 | 0.73 |
| <b>gamma-glutamyltyrosine</b>                      | Peptide      | Gamma-glutamyl Amino Acid                            | -0.11 | 0.13 | 0.73 |
| <b>xylitol</b>                                     | Carbohydrate | Pentose Metabolism                                   | 0.25  | 0.13 | 0.73 |
| <b>tyrosine</b>                                    | Amino Acid   | Phenylalanine and Tyrosine Metabolism                | -0.08 | 0.14 | 0.73 |
| <b>4-guanidinobutanoate</b>                        | Amino Acid   | Guanidino and Acetamido Metabolism                   | -0.49 | 0.14 | 0.74 |
| <b>N-acetyltryptophan</b>                          | Amino Acid   | Tryptophan Metabolism                                | 0.17  | 0.14 | 0.74 |
| <b>1-palmitoyl-GPC (16:0)</b>                      | Lipid        | Lysolipid                                            | 0.12  | 0.14 | 0.74 |
| <b>2-arachidonoyl-GPC* (20:4)*</b>                 | Lipid        | Lysolipid                                            | 0.16  | 0.15 | 0.74 |

|                                                      |                        |                                                      |       |      |      |
|------------------------------------------------------|------------------------|------------------------------------------------------|-------|------|------|
| <b>3-methyl-2-oxobutyrate</b>                        | Amino Acid             | Leucine, Isoleucine and Valine Metabolism            | 0.09  | 0.15 | 0.74 |
| <b>N2,N5-diacetylornithine</b>                       | Amino Acid             | Urea cycle; Arginine and Proline Metabolism          | -0.31 | 0.15 | 0.74 |
| <b>alanine</b>                                       | Amino Acid             | Alanine and Aspartate Metabolism                     | 0.07  | 0.15 | 0.74 |
| <b>glycolate (hydroxyacetate)</b>                    | Xenobiotics            | Chemical                                             | -0.09 | 0.15 | 0.74 |
| <b>uridine</b>                                       | Nucleotide             | Pyrimidine Metabolism, Uracil containing             | 0.08  | 0.15 | 0.74 |
| <b>xanthosine</b>                                    | Nucleotide             | Purine Metabolism, (Hypo)Xanthine/Inosine containing | 0.17  | 0.15 | 0.74 |
| <b>pregnen-diol disulfate*</b>                       | Lipid                  | Steroid                                              | -0.23 | 0.15 | 0.75 |
| <b>inositol 1-phosphate (I1P)</b>                    | Lipid                  | Inositol Metabolism                                  | 0.17  | 0.15 | 0.75 |
| <b>N-acetyl glycine</b>                              | Amino Acid             | Glycine, Serine and Threonine Metabolism             | 0.18  | 0.16 | 0.75 |
| <b>2-linoleoyl-GPE* (18:2)*</b>                      | Lipid                  | Lysolipid                                            | 0.18  | 0.16 | 0.75 |
| <b>stearoyl-linoleoyl-glycerophosphocholine (1)*</b> | Lipid                  | Lysolipid                                            | -0.10 | 0.16 | 0.75 |
| <b>stearate (18:0)</b>                               | Lipid                  | Long Chain Fatty Acid                                | 0.07  | 0.16 | 0.75 |
| <b>gamma-glutamylthreonine*</b>                      | Peptide                | Gamma-glutamyl Amino Acid                            | -0.14 | 0.16 | 0.75 |
| <b>homoarginine</b>                                  | Amino Acid             | Urea cycle; Arginine and Proline Metabolism          | -0.42 | 0.16 | 0.75 |
| <b>O-sulfo-L-tyrosine</b>                            | Xenobiotics            | Chemical                                             | 0.10  | 0.16 | 0.75 |
| <b>2-palmitoyl-GPC* (16:0)*</b>                      | Lipid                  | Lysolipid                                            | 0.14  | 0.16 | 0.75 |
| <b>N2-acetyllysine</b>                               | Amino Acid             | Lysine Metabolism                                    | -0.23 | 0.17 | 0.75 |
| <b>16-hydroxypalmitate</b>                           | Lipid                  | Fatty Acid, Monohydroxy                              | -0.10 | 0.17 | 0.75 |
| <b>gentisate</b>                                     | Amino Acid             | Phenylalanine and Tyrosine Metabolism                | -0.63 | 0.17 | 0.75 |
| <b>ribitol</b>                                       | Carbohydrate           | Pentose Metabolism                                   | 0.09  | 0.17 | 0.75 |
| <b>stearoylcarnitine (C18)</b>                       | Lipid                  | Fatty Acid Metabolism(Acyl Carnitine)                | 0.17  | 0.17 | 0.75 |
| <b>TL14:1n5 (myristoleic acid)</b>                   | Lipid                  | Mole % Total Fatty Acid                              | 0.24  | 0.17 | 0.75 |
| <b>glycocholate sulfate*</b>                         | Lipid                  | Secondary Bile Acid Metabolism                       | -0.15 | 0.17 | 0.75 |
| <b>N-acetyltaurine</b>                               | Amino Acid             | Methionine, Cysteine, SAM and Taurine Metabolism     | 0.17  | 0.17 | 0.75 |
| <b>gamma-CEHC</b>                                    | Cofactors and Vitamins | Tocopherol Metabolism                                | 0.20  | 0.18 | 0.75 |
| <b>homocitrulline</b>                                | Amino Acid             | Urea cycle; Arginine and Proline Metabolism          | 0.18  | 0.18 | 0.75 |
| <b>trans-urocanate</b>                               | Amino Acid             | Histidine Metabolism                                 | 0.18  | 0.18 | 0.75 |
| <b>1-palmitoleoyl-GPC* (16:1)*</b>                   | Lipid                  | Lysolipid                                            | 0.18  | 0.18 | 0.75 |
| <b>sphingomyelin</b>                                 | Lipid                  | Sphingolipid Metabolism                              | 0.11  | 0.18 | 0.75 |
| <b>4-androsten-3beta,17beta-diol monosulfate (2)</b> | Lipid                  | Steroid                                              | -0.34 | 0.18 | 0.75 |
| <b>proline</b>                                       | Amino Acid             | Urea cycle; Arginine and Proline Metabolism          | -0.08 | 0.18 | 0.75 |
| <b>cysteine-glutathione disulfide</b>                | Amino Acid             | Glutathione Metabolism                               | -0.38 | 0.18 | 0.75 |

|                                                     |             |                                             |       |      |      |
|-----------------------------------------------------|-------------|---------------------------------------------|-------|------|------|
| <b>1-docosahexaenoyl-GPC* (22:6)*</b>               | Lipid       | Lysolipid                                   | 0.17  | 0.18 | 0.76 |
| <b>7-methylguanine</b>                              | Nucleotide  | Purine Metabolism, Guanine containing       | -0.08 | 0.19 | 0.76 |
| <b>palmitoyl-oleoyl-glycerophosphocholine (1)*</b>  | Lipid       | Lysolipid                                   | 0.10  | 0.19 | 0.76 |
| <b>hydroxybutyrylcarnitine*</b>                     | Lipid       | Fatty Acid Metabolism(Acyl Carnitine)       | -0.25 | 0.19 | 0.76 |
| <b>4-hydroxyphenylpyruvate</b>                      | Amino Acid  | Phenylalanine and Tyrosine Metabolism       | 0.18  | 0.19 | 0.76 |
| <b>kynurenate</b>                                   | Amino Acid  | Tryptophan Metabolism                       | -0.14 | 0.19 | 0.76 |
| <b>3-methylglutarylcarnitine (2)</b>                | Amino Acid  | Lysine Metabolism                           | 0.22  | 0.19 | 0.76 |
| <b>3-methoxytyramine sulfate</b>                    | Amino Acid  | Phenylalanine and Tyrosine Metabolism       | 0.16  | 0.19 | 0.76 |
| <b>allo-isoleucine</b>                              | Amino Acid  | Leucine, Isoleucine and Valine Metabolism   | -0.09 | 0.19 | 0.76 |
| <b>tetradecanedioate (C14)</b>                      | Lipid       | Fatty Acid, Dicarboxylate                   | -0.17 | 0.20 | 0.76 |
| <b>TL18:0 (stearic acid)</b>                        | Lipid       | Mole % Total Fatty Acid                     | -0.05 | 0.20 | 0.76 |
| <b>arginine</b>                                     | Amino Acid  | Urea cycle; Arginine and Proline Metabolism | -0.10 | 0.20 | 0.76 |
| <b>pipecolate</b>                                   | Amino Acid  | Lysine Metabolism                           | -0.19 | 0.20 | 0.76 |
| <b>N-acetylcitrulline</b>                           | Amino Acid  | Urea cycle; Arginine and Proline Metabolism | -0.35 | 0.20 | 0.77 |
| <b>phenylalanine</b>                                | Amino Acid  | Phenylalanine and Tyrosine Metabolism       | -0.05 | 0.20 | 0.77 |
| <b>TLdm18:1n9 (plasmalogen oleic acid)</b>          | Lipid       | Mole % Total Fatty Acid                     | -0.13 | 0.21 | 0.77 |
| <b>7-HOCA</b>                                       | Lipid       | Sterol                                      | 0.13  | 0.21 | 0.77 |
| <b>hydroquinone sulfate</b>                         | Xenobiotics | Drug                                        | -0.37 | 0.21 | 0.77 |
| <b>N-acetylaspartate (NAA)</b>                      | Amino Acid  | Alanine and Aspartate Metabolism            | -0.08 | 0.21 | 0.77 |
| <b>N-acetylarginine</b>                             | Amino Acid  | Urea cycle; Arginine and Proline Metabolism | -0.15 | 0.21 | 0.77 |
| <b>1-stearoylplasmeneylethanolamine *</b>           | Lipid       | Lysolipid                                   | 0.15  | 0.21 | 0.77 |
| <b>cyclohexanebutanoic acid</b>                     | Xenobiotics | Chemical                                    | -0.15 | 0.21 | 0.77 |
| <b>pyroglutamine*</b>                               | Amino Acid  | Glutamate Metabolism                        | -0.19 | 0.21 | 0.77 |
| <b>cys-gly, oxidized</b>                            | Amino Acid  | Glutathione Metabolism                      | 0.24  | 0.22 | 0.77 |
| <b>4-methyl-2-oxopentanoate</b>                     | Amino Acid  | Leucine, Isoleucine and Valine Metabolism   | 0.08  | 0.22 | 0.77 |
| <b>3beta,7beta-dihydroxy-5-cholestenoate</b>        | Lipid       | Sterol                                      | -0.11 | 0.22 | 0.77 |
| <b>1,6-anhydroglucose</b>                           | Xenobiotics | Food Component/Plant                        | -0.29 | 0.22 | 0.77 |
| <b>arachidate (20:0)</b>                            | Lipid       | Long Chain Fatty Acid                       | 0.08  | 0.22 | 0.77 |
| <b>hexadecanedioate (C16)</b>                       | Lipid       | Fatty Acid, Dicarboxylate                   | -0.16 | 0.22 | 0.77 |
| <b>5alpha-androstan-3beta,17beta-diol disulfate</b> | Lipid       | Steroid                                     | -0.33 | 0.22 | 0.77 |
| <b>seryltyrosine</b>                                | Peptide     | Dipeptide                                   | 0.31  | 0.22 | 0.77 |
| <b>octadecanedioate (C18)</b>                       | Lipid       | Fatty Acid, Dicarboxylate                   | -0.16 | 0.23 | 0.77 |

|                                         |                        |                                                      |       |      |      |
|-----------------------------------------|------------------------|------------------------------------------------------|-------|------|------|
| <b>4-hydroxyhippurate</b>               | Xenobiotics            | Benzoate Metabolism                                  | -0.25 | 0.23 | 0.77 |
| <b>dopamine sulfate (2)</b>             | Amino Acid             | Phenylalanine and Tyrosine Metabolism                | -0.14 | 0.23 | 0.77 |
| <b>docosahexaenoate (DHA; 22:6n3)</b>   | Lipid                  | Polyunsaturated Fatty Acid (n3 and n6)               | 0.14  | 0.23 | 0.77 |
| <b>N-acetylthreonine</b>                | Amino Acid             | Glycine, Serine and Threonine Metabolism             | 0.12  | 0.23 | 0.77 |
| <b>alpha-tocopherol</b>                 | Cofactors and Vitamins | Tocopherol Metabolism                                | 0.13  | 0.23 | 0.77 |
| <b>N-methylpipecolate</b>               | Xenobiotics            | Chemical                                             | -0.22 | 0.23 | 0.77 |
| <b>beta-hydroxyisovaleroylcarnitine</b> | Amino Acid             | Leucine, Isoleucine and Valine Metabolism            | -0.11 | 0.23 | 0.78 |
| <b>prolylhydroxyproline</b>             | Amino Acid             | Urea cycle; Arginine and Proline Metabolism          | 0.16  | 0.23 | 0.78 |
| <b>N-acetylcarnosine</b>                | Peptide                | Dipeptide Derivative                                 | -0.09 | 0.24 | 0.78 |
| <b>trimethylamine N-oxide</b>           | Lipid                  | Phospholipid Metabolism                              | 0.56  | 0.24 | 0.79 |
| <b>aspartylphenylalanine</b>            | Peptide                | Dipeptide                                            | 0.28  | 0.24 | 0.79 |
| <b>andro steroid monosulfate (1)*</b>   | Lipid                  | Steroid                                              | -0.32 | 0.25 | 0.80 |
| <b>3-methylglutaconate</b>              | Amino Acid             | Leucine, Isoleucine and Valine Metabolism            | 0.18  | 0.25 | 0.80 |
| <b>cysteine s-sulfate</b>               | Amino Acid             | Methionine, Cysteine, SAM and Taurine Metabolism     | -0.09 | 0.25 | 0.80 |
| <b>2-eicosatrienoyl-GPC* (20:3)*</b>    | Lipid                  | Lysolipid                                            | 0.11  | 0.26 | 0.80 |
| <b>asparagine</b>                       | Amino Acid             | Alanine and Aspartate Metabolism                     | -0.05 | 0.26 | 0.80 |
| <b>pregn steroid monosulfate*</b>       | Lipid                  | Steroid                                              | -0.18 | 0.26 | 0.80 |
| <b>1-oleoyl-GPC (18:1)</b>              | Lipid                  | Lysolipid                                            | 0.12  | 0.26 | 0.80 |
| <b>TL16:1n7 (palmitoleic acid)</b>      | Lipid                  | Mole % Total Fatty Acid                              | 0.11  | 0.26 | 0.80 |
| <b>TL24:1n9 (nervonic acid)</b>         | Lipid                  | Mole % Total Fatty Acid                              | -0.12 | 0.26 | 0.80 |
| <b>quinat</b>                           | Xenobiotics            | Food Component/Plant                                 | 0.59  | 0.26 | 0.80 |
| <b>21-hydroxypregnenolone disulfate</b> | Lipid                  | Steroid                                              | -0.19 | 0.26 | 0.80 |
| <b>deoxycarnitine</b>                   | Lipid                  | Carnitine Metabolism                                 | -0.06 | 0.26 | 0.80 |
| <b>paraxanthine</b>                     | Xenobiotics            | Xanthine Metabolism                                  | -0.57 | 0.26 | 0.80 |
| <b>1-methylnicotinamide</b>             | Cofactors and Vitamins | Nicotinate and Nicotinamide Metabolism               | -0.32 | 0.26 | 0.80 |
| <b>4-ethylphenyl sulfate</b>            | Xenobiotics            | Benzoate Metabolism                                  | 0.27  | 0.27 | 0.80 |
| <b>inosine</b>                          | Nucleotide             | Purine Metabolism, (Hypo)Xanthine/Inosine containing | -0.35 | 0.27 | 0.80 |
| <b>mannose</b>                          | Carbohydrate           | Fructose, Mannose and Galactose Metabolism           | 0.08  | 0.27 | 0.80 |
| <b>ethylmalonate</b>                    | Amino Acid             | Leucine, Isoleucine and Valine Metabolism            | 0.13  | 0.27 | 0.80 |
| <b>eicosapentaenoate (EPA; 20:5n3)</b>  | Lipid                  | Polyunsaturated Fatty Acid (n3 and n6)               | 0.18  | 0.27 | 0.80 |
| <b>N6-succinyladenosine</b>             | Nucleotide             | Purine Metabolism, Adenine containing                | 0.09  | 0.27 | 0.80 |
| <b>creatine</b>                         | Amino Acid             | Creatine Metabolism                                  | 0.13  | 0.27 | 0.80 |



|                                                      |              |                                                      |       |      |      |
|------------------------------------------------------|--------------|------------------------------------------------------|-------|------|------|
| <b>1-pentadecanoylglycerol (1-monopentadecanoin)</b> | Lipid        | Monoacylglycerol                                     | 0.15  | 0.27 | 0.80 |
| <b>methyl-4-hydroxybenzoate sulfate</b>              | Xenobiotics  | Benzoate Metabolism                                  | -0.48 | 0.27 | 0.80 |
| <b>5,6-dihydrothymine</b>                            | Nucleotide   | Pyrimidine Metabolism, Thymine containing            | -0.09 | 0.28 | 0.80 |
| <b>adrenate (22:4n6)</b>                             | Lipid        | Polyunsaturated Fatty Acid (n3 and n6)               | 0.10  | 0.28 | 0.80 |
| <b>acetoacetate</b>                                  | Lipid        | Ketone Bodies                                        | -0.17 | 0.28 | 0.80 |
| <b>TL20:5n3 (eicosapentaenoic acid)</b>              | Lipid        | Mole % Total Fatty Acid                              | 0.17  | 0.28 | 0.80 |
| <b>1-eicosatrienoyl-GPC* (20:3)*</b>                 | Lipid        | Lysolipid                                            | 0.12  | 0.28 | 0.80 |
| <b>piperine</b>                                      | Xenobiotics  | Food Component/Plant                                 | -0.24 | 0.28 | 0.80 |
| <b>nonadecanoate (19:0)</b>                          | Lipid        | Long Chain Fatty Acid                                | 0.06  | 0.28 | 0.80 |
| <b>5alpha-androstan-3alpha,17beta-diol disulfate</b> | Lipid        | Steroid                                              | -0.38 | 0.28 | 0.81 |
| <b>glucarate 1,4-lactone</b>                         | Carbohydrate | Disaccharides and Oligosaccharides                   | -0.78 | 0.29 | 0.81 |
| <b>TL22:5n3 (docosapentaenoic acid)</b>              | Lipid        | Mole % Total Fatty Acid                              | 0.08  | 0.29 | 0.81 |
| <b>TL20:1n9 (eicoasaenoic acid)</b>                  | Lipid        | Mole % Total Fatty Acid                              | -0.05 | 0.30 | 0.81 |
| <b>ectoine</b>                                       | Xenobiotics  | Chemical                                             | -0.29 | 0.30 | 0.81 |
| <b>3-hydroxy-3-methylglutarate</b>                   | Lipid        | Mevalonate Metabolism                                | 0.08  | 0.30 | 0.81 |
| <b>valine</b>                                        | Amino Acid   | Leucine, Isoleucine and Valine Metabolism            | -0.04 | 0.30 | 0.81 |
| <b>sulfate*</b>                                      | Xenobiotics  | Chemical                                             | 0.04  | 0.30 | 0.81 |
| <b>indoleacetate</b>                                 | Amino Acid   | Tryptophan Metabolism                                | 0.14  | 0.30 | 0.81 |
| <b>palmitoylcarnitine (C16)</b>                      | Lipid        | Fatty Acid Metabolism(Acyl Carnitine)                | 0.12  | 0.30 | 0.81 |
| <b>cyclo(L-phe-L-pro)</b>                            | Peptide      | Dipeptide                                            | -0.23 | 0.31 | 0.81 |
| <b>1-stearoyl-GPC (18:0)</b>                         | Lipid        | Lysolipid                                            | 0.12  | 0.31 | 0.81 |
| <b>fucose</b>                                        | Carbohydrate | Pentose Metabolism                                   | 0.11  | 0.31 | 0.81 |
| <b>N-acetylputrescine</b>                            | Amino Acid   | Polyamine Metabolism                                 | 0.11  | 0.31 | 0.81 |
| <b>cortisone</b>                                     | Lipid        | Steroid                                              | -0.16 | 0.31 | 0.81 |
| <b>12,13-DiHOME</b>                                  | Lipid        | Fatty Acid, Dihydroxy                                | -0.15 | 0.31 | 0.81 |
| <b>oleoyl-linoleoyl-glycerophosphocholine (2)*</b>   | Lipid        | Lysolipid                                            | 0.08  | 0.31 | 0.81 |
| <b>gamma-glutamylmethionine</b>                      | Peptide      | Gamma-glutamyl Amino Acid                            | -0.11 | 0.31 | 0.81 |
| <b>histidylphenylalanine</b>                         | Peptide      | Dipeptide                                            | 0.31  | 0.31 | 0.81 |
| <b>caffeine</b>                                      | Xenobiotics  | Xanthine Metabolism                                  | -0.48 | 0.32 | 0.81 |
| <b>ornithine</b>                                     | Amino Acid   | Urea cycle; Arginine and Proline Metabolism          | -0.08 | 0.32 | 0.81 |
| <b>N-acetyl-1-methylhistidine*</b>                   | Amino Acid   | Histidine Metabolism                                 | -0.15 | 0.32 | 0.81 |
| <b>7-methylurate</b>                                 | Xenobiotics  | Xanthine Metabolism                                  | -0.49 | 0.32 | 0.81 |
| <b>lactate</b>                                       | Carbohydrate | Glycolysis, Gluconeogenesis, and Pyruvate Metabolism | 0.06  | 0.32 | 0.81 |
| <b>citrulline</b>                                    | Amino Acid   | Urea cycle; Arginine and Proline Metabolism          | -0.10 | 0.32 | 0.81 |

|                                                          |                        |                                                  |       |      |      |
|----------------------------------------------------------|------------------------|--------------------------------------------------|-------|------|------|
| <b>leucylalanine</b>                                     | Peptide                | Dipeptide                                        | 0.26  | 0.32 | 0.81 |
| <b>alpha-ketobutyrate</b>                                | Amino Acid             | Methionine, Cysteine, SAM and Taurine Metabolism | 0.21  | 0.32 | 0.81 |
| <b>arachidonate (20:4n6)</b>                             | Lipid                  | Polyunsaturated Fatty Acid (n3 and n6)           | 0.06  | 0.32 | 0.81 |
| <b>androsterone sulfate</b>                              | Lipid                  | Steroid                                          | -0.27 | 0.32 | 0.81 |
| <b>3-hydroxypyridine sulfate</b>                         | Xenobiotics            | Chemical                                         | 0.31  | 0.32 | 0.81 |
| <b>glutamate</b>                                         | Amino Acid             | Glutamate Metabolism                             | 0.08  | 0.33 | 0.81 |
| <b>lanosterol</b>                                        | Lipid                  | Sterol                                           | 0.27  | 0.33 | 0.81 |
| <b>2-aminooctanoate</b>                                  | Lipid                  | Fatty Acid, Amino                                | 0.14  | 0.33 | 0.82 |
| <b>histidine</b>                                         | Amino Acid             | Histidine Metabolism                             | 0.09  | 0.33 | 0.82 |
| <b>N-acetylneuraminate</b>                               | Carbohydrate           | Aminosugar Metabolism                            | 0.11  | 0.34 | 0.82 |
| <b>TL18:3n3 (a-linolenic acid)</b>                       | Lipid                  | Mole % Total Fatty Acid                          | 0.07  | 0.34 | 0.82 |
| <b>docosapentaenoate (n6 DPA; 22:5n6)</b>                | Lipid                  | Polyunsaturated Fatty Acid (n3 and n6)           | 0.08  | 0.34 | 0.82 |
| <b>dehydroisoandrosterone sulfate (DHEA-S)</b>           | Lipid                  | Steroid                                          | -0.19 | 0.34 | 0.82 |
| <b>1-palmitoylplasmeneylethanolamine*</b>                | Lipid                  | Lysolipid                                        | 0.08  | 0.34 | 0.82 |
| <b>1-docosapentaenoyl-GPC* (22:5n3)*</b>                 | Lipid                  | Lysolipid                                        | 0.11  | 0.34 | 0.82 |
| <b>3-indoxyl sulfate</b>                                 | Amino Acid             | Tryptophan Metabolism                            | 0.15  | 0.34 | 0.82 |
| <b>desmosterol</b>                                       | Lipid                  | Sterol                                           | -0.17 | 0.35 | 0.82 |
| <b>cholestanol</b>                                       | Lipid                  | Sterol                                           | -0.09 | 0.35 | 0.82 |
| <b>pyridoxate</b>                                        | Cofactors and Vitamins | Vitamin B6 Metabolism                            | 0.19  | 0.35 | 0.82 |
| <b>palmitoyl-arachidonoyl-glycerophosphocholine (2)*</b> | Lipid                  | Lysolipid                                        | 0.06  | 0.35 | 0.82 |
| <b>10-undecenoate (11:1n1)</b>                           | Lipid                  | Medium Chain Fatty Acid                          | -0.10 | 0.35 | 0.83 |
| <b>dodecanedioate (C12)</b>                              | Lipid                  | Fatty Acid, Dicarboxylate                        | -0.12 | 0.35 | 0.83 |
| <b>3-hydroxyoctanoate</b>                                | Lipid                  | Fatty Acid, Monohydroxy                          | -0.11 | 0.35 | 0.83 |
| <b>imidazole lactate</b>                                 | Amino Acid             | Histidine Metabolism                             | -0.09 | 0.36 | 0.83 |
| <b>oxalate (ethanedioate)</b>                            | Cofactors and Vitamins | Ascorbate and Aldarate Metabolism                | -0.16 | 0.36 | 0.83 |
| <b>isoleucine</b>                                        | Amino Acid             | Leucine, Isoleucine and Valine Metabolism        | -0.04 | 0.36 | 0.83 |
| <b>taurochenodeoxycholate</b>                            | Lipid                  | Primary Bile Acid Metabolism                     | -0.29 | 0.36 | 0.83 |
| <b>N6-methyladenosine</b>                                | Nucleotide             | Purine Metabolism, Adenine containing            | 0.10  | 0.36 | 0.83 |
| <b>alpha-hydroxyisovalerate</b>                          | Amino Acid             | Leucine, Isoleucine and Valine Metabolism        | 0.11  | 0.37 | 0.84 |
| <b>stachydrine</b>                                       | Xenobiotics            | Food Component/Plant                             | 0.29  | 0.37 | 0.84 |
| <b>palmitoyl-arachidonoyl-glycerophosphocholine (1)*</b> | Lipid                  | Lysolipid                                        | 0.11  | 0.37 | 0.84 |
| <b>5-hydroxyindoleacetate</b>                            | Amino Acid             | Tryptophan Metabolism                            | 0.09  | 0.37 | 0.84 |
| <b>palmitate (16:0)</b>                                  | Lipid                  | Long Chain Fatty Acid                            | 0.05  | 0.37 | 0.84 |

|                                        |                        |                                             |       |      |      |
|----------------------------------------|------------------------|---------------------------------------------|-------|------|------|
| <b>4-ureidobutyrate</b>                | Nucleotide             | Pyrimidine Metabolism, Uracil containing    | -0.14 | 0.37 | 0.84 |
| <b>myristoylcarnitine</b>              | Lipid                  | Fatty Acid Metabolism(Acyl Carnitine)       | 0.13  | 0.37 | 0.84 |
| <b>eicosenoyl sphingomyelin*</b>       | Lipid                  | Sphingolipid Metabolism                     | 0.08  | 0.37 | 0.84 |
| <b>myristoyl sphingomyelin*</b>        | Lipid                  | Sphingolipid Metabolism                     | 0.05  | 0.38 | 0.84 |
| <b>ursodeoxycholate</b>                | Lipid                  | Secondary Bile Acid Metabolism              | 0.37  | 0.38 | 0.84 |
| <b>leucine</b>                         | Amino Acid             | Leucine, Isoleucine and Valine Metabolism   | -0.04 | 0.38 | 0.84 |
| <b>theophylline</b>                    | Xenobiotics            | Xanthine Metabolism                         | -0.36 | 0.38 | 0.85 |
| <b>serotonin (5HT)</b>                 | Amino Acid             | Tryptophan Metabolism                       | 0.23  | 0.39 | 0.85 |
| <b>oleoylcarnitine (C18)</b>           | Lipid                  | Fatty Acid Metabolism(Acyl Carnitine)       | 0.11  | 0.39 | 0.85 |
| <b>cis-4-decenoyl carnitine</b>        | Lipid                  | Fatty Acid Metabolism(Acyl Carnitine)       | -0.09 | 0.39 | 0.85 |
| <b>glycerophosphorylcholine (GPC)</b>  | Lipid                  | Phospholipid Metabolism                     | 0.06  | 0.39 | 0.85 |
| <b>TL22:0 (behenic acid)</b>           | Lipid                  | Mole % Total Fatty Acid                     | -0.09 | 0.39 | 0.85 |
| <b>maleate (cis-Butenedioate)</b>      | Lipid                  | Fatty Acid, Dicarboxylate                   | 0.13  | 0.39 | 0.85 |
| <b>TL16:0 (palmitic acid)</b>          | Lipid                  | Mole % Total Fatty Acid                     | 0.03  | 0.39 | 0.85 |
| <b>1-linoleoyl-GPE (18:2)*</b>         | Lipid                  | Lysolipid                                   | 0.08  | 0.40 | 0.85 |
| <b>acetylcarnitine (C2)</b>            | Lipid                  | Fatty Acid Metabolism(Acyl Carnitine)       | -0.08 | 0.40 | 0.85 |
| <b>lathosterol</b>                     | Lipid                  | Sterol                                      | 0.15  | 0.41 | 0.85 |
| <b>glycylproline</b>                   | Peptide                | Dipeptide                                   | 0.22  | 0.41 | 0.85 |
| <b>12-HETE</b>                         | Lipid                  | Eicosanoid                                  | -0.23 | 0.41 | 0.85 |
| <b>docosapentaenoate (DPA; 22:5n3)</b> | Lipid                  | Polyunsaturated Fatty Acid (n3 and n6)      | 0.09  | 0.41 | 0.85 |
| <b>serine</b>                          | Amino Acid             | Glycine, Serine and Threonine Metabolism    | -0.05 | 0.41 | 0.85 |
| <b>threonate</b>                       | Cofactors and Vitamins | Ascorbate and Aldarate Metabolism           | -0.14 | 0.41 | 0.85 |
| <b>mannitol</b>                        | Carbohydrate           | Fructose, Mannose and Galactose Metabolism  | 0.27  | 0.41 | 0.85 |
| <b>2-linoleoyl-GPC* (18:2)*</b>        | Lipid                  | Lysolipid                                   | 0.09  | 0.41 | 0.85 |
| <b>5-oxoproline</b>                    | Amino Acid             | Glutathione Metabolism                      | -0.07 | 0.41 | 0.85 |
| <b>theobromine</b>                     | Xenobiotics            | Xanthine Metabolism                         | -0.27 | 0.41 | 0.85 |
| <b>10-nonadecenoate (19:1n9)</b>       | Lipid                  | Long Chain Fatty Acid                       | 0.08  | 0.41 | 0.85 |
| <b>cyclo(leu-pro)</b>                  | Peptide                | Dipeptide                                   | -0.15 | 0.41 | 0.85 |
| <b>succinate</b>                       | Energy                 | TCA Cycle                                   | -0.04 | 0.41 | 0.85 |
| <b>quinolinate</b>                     | Cofactors and Vitamins | Nicotinate and Nicotinamide Metabolism      | 0.14  | 0.42 | 0.86 |
| <b>methylsuccinate</b>                 | Amino Acid             | Leucine, Isoleucine and Valine Metabolism   | -0.06 | 0.42 | 0.86 |
| <b>pyroglutamylglycine</b>             | Peptide                | Dipeptide                                   | 0.19  | 0.42 | 0.86 |
| <b>hydroxyproline</b>                  | Amino Acid             | Urea cycle; Arginine and Proline Metabolism | -0.10 | 0.42 | 0.86 |
| <b>3-(3-hydroxyphenyl)propionate</b>   | Amino Acid             | Phenylalanine and Tyrosine Metabolism       | -0.34 | 0.42 | 0.86 |

|                                                             |                        |                                                      |       |      |      |
|-------------------------------------------------------------|------------------------|------------------------------------------------------|-------|------|------|
| <b>urea</b>                                                 | Amino Acid             | Urea cycle; Arginine and Proline Metabolism          | -0.07 | 0.42 | 0.86 |
| <b>TLdm18:1n7 (plasmalogen vaccenic acid)</b>               | Lipid                  | Mole % Total Fatty Acid                              | -0.17 | 0.43 | 0.86 |
| <b>pregnenediol-3-glucuronide</b>                           | Lipid                  | Steroid                                              | -0.27 | 0.43 | 0.86 |
| <b>nicotinamide</b>                                         | Cofactors and Vitamins | Nicotinate and Nicotinamide Metabolism               | 0.11  | 0.43 | 0.86 |
| <b>sphinganine</b>                                          | Lipid                  | Sphingolipid Metabolism                              | 0.28  | 0.43 | 0.86 |
| <b>myristoleoyl sphingomyelin*</b>                          | Lipid                  | Sphingolipid Metabolism                              | -0.10 | 0.43 | 0.86 |
| <b>caprylate (8:0)</b>                                      | Lipid                  | Medium Chain Fatty Acid                              | -0.05 | 0.43 | 0.86 |
| <b>urate</b>                                                | Nucleotide             | Purine Metabolism, (Hypo)Xanthine/Inosine containing | 0.05  | 0.44 | 0.86 |
| <b>pseudouridine</b>                                        | Nucleotide             | Pyrimidine Metabolism, Uracil containing             | 0.04  | 0.44 | 0.86 |
| <b>dimethyl sulfone</b>                                     | Xenobiotics            | Chemical                                             | 0.26  | 0.44 | 0.86 |
| <b>palmitoleoyl sphingomyelin*</b>                          | Lipid                  | Sphingolipid Metabolism                              | -0.04 | 0.44 | 0.86 |
| <b>3-carboxy-4-methyl-5-propyl-2-furanpropanoate (CMPF)</b> | Lipid                  | Fatty Acid, Dicarboxylate                            | 0.30  | 0.44 | 0.86 |
| <b>1-methylguanosine</b>                                    | Nucleotide             | Purine Metabolism, Guanine containing                | 0.04  | 0.44 | 0.86 |
| <b>N-acetylphenylalanine</b>                                | Amino Acid             | Phenylalanine and Tyrosine Metabolism                | -0.09 | 0.44 | 0.86 |
| <b>1-palmitoylglycerophosphate</b>                          | Lipid                  | Lysolipid                                            | 0.13  | 0.45 | 0.86 |
| <b>2-hydroxystearate</b>                                    | Lipid                  | Fatty Acid, Monohydroxy                              | -0.04 | 0.45 | 0.86 |
| <b>4-androsten-3alpha,17alpha-diol monosulfate (3)</b>      | Lipid                  | Steroid                                              | -0.20 | 0.45 | 0.86 |
| <b>1,7-dimethylurate</b>                                    | Xenobiotics            | Xanthine Metabolism                                  | -0.32 | 0.45 | 0.86 |
| <b>3-methyl-2-oxovalerate</b>                               | Amino Acid             | Leucine, Isoleucine and Valine Metabolism            | 0.05  | 0.45 | 0.87 |
| <b>kynurenine</b>                                           | Amino Acid             | Tryptophan Metabolism                                | 0.05  | 0.46 | 0.87 |
| <b>tartarate</b>                                            | Xenobiotics            | Food Component/Plant                                 | -0.23 | 0.46 | 0.87 |
| <b>N-palmitoyl glycine</b>                                  | Lipid                  | Fatty Acid Metabolism(Acyl Glycine)                  | -0.10 | 0.46 | 0.87 |
| <b>beta-tocopherol</b>                                      | Cofactors and Vitamins | Tocopherol Metabolism                                | 0.17  | 0.46 | 0.87 |
| <b>N-acetyltyrosine</b>                                     | Amino Acid             | Phenylalanine and Tyrosine Metabolism                | -0.08 | 0.46 | 0.87 |
| <b>4-vinylphenol sulfate</b>                                | Xenobiotics            | Benzoate Metabolism                                  | -0.23 | 0.46 | 0.87 |
| <b>glycolithocholate</b>                                    | Lipid                  | Secondary Bile Acid Metabolism                       | -0.32 | 0.46 | 0.87 |
| <b>17-methylstearate</b>                                    | Lipid                  | Fatty Acid, Branched                                 | 0.08  | 0.46 | 0.87 |
| <b>ribonate (ribonolactone)</b>                             | Carbohydrate           | Pentose Metabolism                                   | -0.07 | 0.46 | 0.87 |
| <b>erythritol</b>                                           | Xenobiotics            | Food Component/Plant                                 | 0.10  | 0.47 | 0.87 |
| <b>phenylalanylphenylalanine</b>                            | Peptide                | Dipeptide                                            | 0.11  | 0.47 | 0.87 |
| <b>stearoyl-linoleoyl-glycerophosphoethanolamine (1)*</b>   | Lipid                  | Lysolipid                                            | 0.10  | 0.47 | 0.87 |
| <b>4-acetamidobutanoate</b>                                 | Amino Acid             | Polyamine Metabolism                                 | 0.06  | 0.47 | 0.87 |

|                                                         |                        |                                                  |       |      |      |
|---------------------------------------------------------|------------------------|--------------------------------------------------|-------|------|------|
| <b>pentadecanoate (15:0)</b>                            | Lipid                  | Long Chain Fatty Acid                            | 0.05  | 0.47 | 0.87 |
| <b>bilirubin</b>                                        | Cofactors and Vitamins | Hemoglobin and Porphyrin Metabolism              | -0.21 | 0.48 | 0.87 |
| <b>2-aminoheptanoate</b>                                | Lipid                  | Fatty Acid, Amino                                | 0.07  | 0.48 | 0.87 |
| <b>4-androsten-3beta,17beta-diol disulfate (1)</b>      | Lipid                  | Steroid                                          | -0.16 | 0.48 | 0.87 |
| <b>taurine</b>                                          | Amino Acid             | Methionine, Cysteine, SAM and Taurine Metabolism | -0.07 | 0.48 | 0.88 |
| <b>2-hydroxyoctanoate</b>                               | Lipid                  | Fatty Acid, Monohydroxy                          | 0.08  | 0.48 | 0.88 |
| <b>4-androsten-3alpha,17alpha-diol monosulfate (2)</b>  | Lipid                  | Steroid                                          | -0.17 | 0.49 | 0.88 |
| <b>5-methylthioadenosine (MTA)</b>                      | Amino Acid             | Polyamine Metabolism                             | 0.23  | 0.49 | 0.88 |
| <b>tiglyl carnitine (C5)</b>                            | Amino Acid             | Leucine, Isoleucine and Valine Metabolism        | -0.08 | 0.49 | 0.88 |
| <b>tyrosylglutamate</b>                                 | Peptide                | Dipeptide                                        | 0.19  | 0.49 | 0.88 |
| <b>5alpha-pregnan-3beta,20alpha-diol disulfate</b>      | Lipid                  | Steroid                                          | -0.15 | 0.49 | 0.88 |
| <b>2-linolenoylglycerophosphocholine (18:3n3)*</b>      | Lipid                  | Lysolipid                                        | -0.23 | 0.49 | 0.88 |
| <b>pantothenate (Vitamin B5)</b>                        | Cofactors and Vitamins | Pantothenate and CoA Metabolism                  | 0.08  | 0.49 | 0.88 |
| <b>dopamine sulfate (1)</b>                             | Amino Acid             | Phenylalanine and Tyrosine Metabolism            | -0.12 | 0.50 | 0.88 |
| <b>pyrraline</b>                                        | Xenobiotics            | Food Component/Plant                             | 0.17  | 0.50 | 0.88 |
| <b>TL22:4n6 (adrenic acid)</b>                          | Lipid                  | Mole % Total Fatty Acid                          | 0.06  | 0.50 | 0.88 |
| <b>tartronate (hydroxymalonate)</b>                     | Xenobiotics            | Bacterial/Fungal                                 | -0.11 | 0.50 | 0.88 |
| <b>1,3-dimethylurate</b>                                | Xenobiotics            | Xanthine Metabolism                              | -0.30 | 0.50 | 0.89 |
| <b>alpha-hydroxyisocaproate</b>                         | Amino Acid             | Leucine, Isoleucine and Valine Metabolism        | -0.06 | 0.50 | 0.89 |
| <b>5-dodecenoate (12:1n7)</b>                           | Lipid                  | Medium Chain Fatty Acid                          | -0.08 | 0.51 | 0.89 |
| <b>erythronate*</b>                                     | Carbohydrate           | Aminosugar Metabolism                            | 0.04  | 0.51 | 0.89 |
| <b>TL15:0 (pentadecanoic acid)</b>                      | Lipid                  | Mole % Total Fatty Acid                          | 0.03  | 0.52 | 0.90 |
| <b>N-acetylkynurenine (2)</b>                           | Amino Acid             | Tryptophan Metabolism                            | -0.21 | 0.52 | 0.90 |
| <b>2-aminophenol sulfate</b>                            | Xenobiotics            | Chemical                                         | 0.19  | 0.52 | 0.90 |
| <b>2-pyrrolidinone</b>                                  | Xenobiotics            | Chemical                                         | -0.12 | 0.52 | 0.90 |
| <b>homovanillate (HVA)</b>                              | Amino Acid             | Phenylalanine and Tyrosine Metabolism            | -0.08 | 0.52 | 0.90 |
| <b>malate</b>                                           | Energy                 | TCA Cycle                                        | -0.05 | 0.52 | 0.90 |
| <b>glycylvaline</b>                                     | Peptide                | Dipeptide                                        | 0.26  | 0.53 | 0.90 |
| <b>stearoyl-arachidonoylglycerophosphoinositol (1)*</b> | Lipid                  | Lysolipid                                        | 0.05  | 0.53 | 0.90 |
| <b>phenyllactate (PLA)</b>                              | Amino Acid             | Phenylalanine and Tyrosine Metabolism            | 0.05  | 0.53 | 0.90 |
| <b>TL22:1n9 (erucic acid)</b>                           | Lipid                  | Mole % Total Fatty Acid                          | -0.14 | 0.54 | 0.91 |
| <b>squalene</b>                                         | Lipid                  | Sterol                                           | 0.19  | 0.54 | 0.91 |
| <b>TL22:6n3 (docosahexaenoic acid)</b>                  | Lipid                  | Mole % Total Fatty Acid                          | 0.06  | 0.54 | 0.91 |

|                                                         |                        |                                                      |       |      |      |
|---------------------------------------------------------|------------------------|------------------------------------------------------|-------|------|------|
| <b>1-eicosenoylglycerophosphocholine (20:1n9)*</b>      | Lipid                  | Lysolipid                                            | 0.09  | 0.54 | 0.91 |
| <b>myristoleate (14:1n5)</b>                            | Lipid                  | Long Chain Fatty Acid                                | -0.16 | 0.54 | 0.91 |
| <b>leucylglycine</b>                                    | Peptide                | Dipeptide                                            | 0.22  | 0.54 | 0.91 |
| <b>stearoyl-arachidonoyl-glycerophosphocholine (1)*</b> | Lipid                  | Lysolipid                                            | -0.13 | 0.54 | 0.91 |
| <b>glycerol 3-phosphate (G3P)</b>                       | Lipid                  | Glycerolipid Metabolism                              | -0.15 | 0.54 | 0.91 |
| <b>glucuronate</b>                                      | Carbohydrate           | Aminosugar Metabolism                                | 0.06  | 0.54 | 0.91 |
| <b>3-hydroxydecanoate</b>                               | Lipid                  | Fatty Acid, Monohydroxy                              | -0.06 | 0.55 | 0.91 |
| <b>3-hydroxyhippurate</b>                               | Xenobiotics            | Benzoate Metabolism                                  | -0.22 | 0.55 | 0.91 |
| <b>5,6-dihydrouracil</b>                                | Nucleotide             | Pyrimidine Metabolism, Uracil containing             | -0.05 | 0.55 | 0.91 |
| <b>N-acetylisoleucine</b>                               | Amino Acid             | Leucine, Isoleucine and Valine Metabolism            | -0.09 | 0.55 | 0.91 |
| <b>HWESASXX*</b>                                        | Peptide                | Polypeptide                                          | -0.14 | 0.55 | 0.91 |
| <b>octanoylcarnitine (C8)</b>                           | Lipid                  | Fatty Acid Metabolism(Acyl Carnitine)                | -0.05 | 0.56 | 0.91 |
| <b>1,3,7-trimethylurate</b>                             | Xenobiotics            | Xanthine Metabolism                                  | -0.21 | 0.56 | 0.91 |
| <b>indole-3-carboxylic acid</b>                         | Amino Acid             | Tryptophan Metabolism                                | 0.04  | 0.56 | 0.91 |
| <b>2-stearoyl-GPC* (18:0)*</b>                          | Lipid                  | Lysolipid                                            | 0.08  | 0.56 | 0.91 |
| <b>cortisol</b>                                         | Lipid                  | Steroid                                              | -0.08 | 0.56 | 0.91 |
| <b>vanillylmandelate (VMA)</b>                          | Amino Acid             | Phenylalanine and Tyrosine Metabolism                | 0.07  | 0.56 | 0.91 |
| <b>tryptophan</b>                                       | Amino Acid             | Tryptophan Metabolism                                | -0.03 | 0.56 | 0.91 |
| <b>1-palmitoyl-GPI* (16:0)*</b>                         | Lipid                  | Lysolipid                                            | 0.09  | 0.56 | 0.91 |
| <b>S-adenosylhomocysteine (SAH)</b>                     | Amino Acid             | Methionine, Cysteine, SAM and Taurine Metabolism     | 0.08  | 0.57 | 0.91 |
| <b>allantoin</b>                                        | Nucleotide             | Purine Metabolism, (Hypo)Xanthine/Inosine containing | 0.09  | 0.57 | 0.91 |
| <b>prolylglycine</b>                                    | Peptide                | Dipeptide                                            | -0.11 | 0.57 | 0.91 |
| <b>palmitoyl-oleoyl-glycerophosphoglycerol (2)*</b>     | Lipid                  | Lysolipid                                            | -0.20 | 0.57 | 0.91 |
| <b>margarate (17:0)</b>                                 | Lipid                  | Long Chain Fatty Acid                                | 0.05  | 0.58 | 0.92 |
| <b>eicosanodioate</b>                                   | Lipid                  | Fatty Acid, Dicarboxylate                            | -0.08 | 0.58 | 0.92 |
| <b>adenine</b>                                          | Nucleotide             | Purine Metabolism, Adenine containing                | -0.07 | 0.58 | 0.92 |
| <b>I-urobilinogen</b>                                   | Cofactors and Vitamins | Hemoglobin and Porphyrin Metabolism                  | 0.25  | 0.58 | 0.92 |
| <b>cholate</b>                                          | Lipid                  | Primary Bile Acid Metabolism                         | 0.22  | 0.59 | 0.92 |
| <b>p-cresol sulfate</b>                                 | Amino Acid             | Phenylalanine and Tyrosine Metabolism                | 0.16  | 0.59 | 0.92 |
| <b>arabonate</b>                                        | Cofactors and Vitamins | Ascorbate and Aldarate Metabolism                    | 0.05  | 0.59 | 0.92 |
| <b>beta-sitosterol</b>                                  | Lipid                  | Sterol                                               | 0.07  | 0.59 | 0.92 |
| <b>gamma-glutamylphenylalanine</b>                      | Peptide                | Gamma-glutamyl Amino Acid                            | -0.03 | 0.59 | 0.92 |

|                                                        |              |                                                      |       |      |      |
|--------------------------------------------------------|--------------|------------------------------------------------------|-------|------|------|
| <b>isovalerate (C5)</b>                                | Amino Acid   | Leucine, Isoleucine and Valine Metabolism            | -0.05 | 0.59 | 0.92 |
| <b>phenol sulfate</b>                                  | Amino Acid   | Phenylalanine and Tyrosine Metabolism                | -0.16 | 0.59 | 0.92 |
| <b>choline</b>                                         | Lipid        | Phospholipid Metabolism                              | 0.03  | 0.60 | 0.92 |
| <b>oleic ethanolamide</b>                              | Lipid        | Endocannabinoid                                      | -0.05 | 0.60 | 0.93 |
| <b>levulinate (4-oxovalerate)</b>                      | Xenobiotics  | Food Component/Plant                                 | -0.06 | 0.60 | 0.93 |
| <b>3-hydroxymyristate</b>                              | Lipid        | Fatty Acid, Monohydroxy                              | -0.05 | 0.60 | 0.93 |
| <b>phenylalanylglutamate</b>                           | Peptide      | Dipeptide                                            | 0.27  | 0.61 | 0.93 |
| <b>palmitoyl-linoleoyl-glycerophosphoinositol (1)*</b> | Lipid        | Lysolipid                                            | 0.11  | 0.61 | 0.93 |
| <b>cystine</b>                                         | Amino Acid   | Methionine, Cysteine, SAM and Taurine Metabolism     | 0.03  | 0.61 | 0.93 |
| <b>hypoxanthine</b>                                    | Nucleotide   | Purine Metabolism, (Hypo)Xanthine/Inosine containing | 0.10  | 0.61 | 0.93 |
| <b>2-hydroxypalmitate</b>                              | Lipid        | Fatty Acid, Monohydroxy                              | -0.03 | 0.61 | 0.93 |
| <b>TL20:3n6 (di-homo-g-linoleic acid)</b>              | Lipid        | Mole % Total Fatty Acid                              | -0.03 | 0.61 | 0.93 |
| <b>1,5-anhydroglucitol (1,5-AG)</b>                    | Carbohydrate | Glycolysis, Gluconeogenesis, and Pyruvate Metabolism | -0.08 | 0.62 | 0.93 |
| <b>1-methylimidazoleacetate</b>                        | Amino Acid   | Histidine Metabolism                                 | -0.09 | 0.62 | 0.93 |
| <b>salicylate</b>                                      | Xenobiotics  | Drug                                                 | -0.22 | 0.62 | 0.93 |
| <b>1,2-propanediol</b>                                 | Xenobiotics  | Chemical                                             | 0.12  | 0.62 | 0.93 |
| <b>saccharin</b>                                       | Xenobiotics  | Food Component/Plant                                 | 0.31  | 0.62 | 0.93 |
| <b>phenylalanylserine</b>                              | Peptide      | Dipeptide                                            | -0.18 | 0.62 | 0.93 |
| <b>1-linoleoyl-GPC (18:2)</b>                          | Lipid        | Lysolipid                                            | 0.04  | 0.62 | 0.93 |
| <b>aspartate</b>                                       | Amino Acid   | Alanine and Aspartate Metabolism                     | 0.05  | 0.62 | 0.93 |
| <b>N-acetyl-beta-alanine</b>                           | Nucleotide   | Pyrimidine Metabolism, Uracil containing             | -0.04 | 0.62 | 0.93 |
| <b>2-methylbutyrylcarnitine (C5)</b>                   | Amino Acid   | Leucine, Isoleucine and Valine Metabolism            | -0.04 | 0.62 | 0.93 |
| <b>cyclo(pro-pro)</b>                                  | Peptide      | Dipeptide                                            | 0.06  | 0.63 | 0.93 |
| <b>TL20:4n3 (eicosatetranoic acid)</b>                 | Lipid        | Mole % Total Fatty Acid                              | 0.06  | 0.63 | 0.93 |
| <b>docosadienoate (22:2n6)</b>                         | Lipid        | Polyunsaturated Fatty Acid (n3 and n6)               | 0.04  | 0.63 | 0.93 |
| <b>5alpha-androstan-3beta,17alpha-diol disulfate</b>   | Lipid        | Steroid                                              | -0.15 | 0.63 | 0.93 |
| <b>gamma-glutamyltryptophan</b>                        | Peptide      | Gamma-glutamyl Amino Acid                            | -0.04 | 0.63 | 0.93 |
| <b>phosphate</b>                                       | Energy       | Oxidative Phosphorylation                            | -0.02 | 0.63 | 0.93 |
| <b>guanidinoacetate</b>                                | Amino Acid   | Creatine Metabolism                                  | -0.05 | 0.64 | 0.93 |
| <b>3-methoxycatechol sulfate (1)</b>                   | Xenobiotics  | Benzoate Metabolism                                  | -0.18 | 0.64 | 0.93 |
| <b>gamma-glutamylhistidine</b>                         | Peptide      | Gamma-glutamyl Amino Acid                            | -0.11 | 0.64 | 0.93 |
| <b>phenylacetylglutamine</b>                           | Amino Acid   | Phenylalanine and Tyrosine Metabolism                | 0.08  | 0.64 | 0.93 |
| <b>vaccenate (18:1n7)</b>                              | Lipid        | Long Chain Fatty Acid                                | -0.04 | 0.64 | 0.93 |

|                                                      |              |                                                  |       |      |      |
|------------------------------------------------------|--------------|--------------------------------------------------|-------|------|------|
| <b>C-glycosyltryptophan</b>                          | Amino Acid   | Tryptophan Metabolism                            | 0.02  | 0.65 | 0.93 |
| <b>cholesterol</b>                                   | Lipid        | Sterol                                           | -0.03 | 0.65 | 0.93 |
| <b>taurodeoxycholate</b>                             | Lipid        | Secondary Bile Acid Metabolism                   | -0.22 | 0.65 | 0.93 |
| <b>2-piperidinone</b>                                | Xenobiotics  | Food Component/Plant                             | 0.13  | 0.65 | 0.93 |
| <b>cinnamoylglycine</b>                              | Xenobiotics  | Food Component/Plant                             | 0.24  | 0.65 | 0.93 |
| <b>4-allylphenol sulfate</b>                         | Xenobiotics  | Food Component/Plant                             | 0.12  | 0.65 | 0.93 |
| <b>scyllo-inositol</b>                               | Lipid        | Inositol Metabolism                              | -0.08 | 0.66 | 0.93 |
| <b>stigmasterol</b>                                  | Lipid        | Sterol                                           | -0.09 | 0.66 | 0.93 |
| <b>3-[3-(sulfooxy)phenyl]propanoic acid</b>          | Amino Acid   | Phenylalanine and Tyrosine Metabolism            | 0.22  | 0.66 | 0.93 |
| <b>2-methylmalonyl carnitine</b>                     | Lipid        | Fatty Acid Synthesis                             | -0.04 | 0.66 | 0.93 |
| <b>cyclo(gly-pro)</b>                                | Peptide      | Dipeptide                                        | 0.07  | 0.66 | 0.93 |
| <b>glycerol</b>                                      | Lipid        | Glycerolipid Metabolism                          | 0.04  | 0.66 | 0.93 |
| <b>N-acetyl-3-methylhistidine*</b>                   | Amino Acid   | Histidine Metabolism                             | -0.13 | 0.66 | 0.93 |
| <b>guanosine</b>                                     | Nucleotide   | Purine Metabolism, Guanine containing            | -0.16 | 0.66 | 0.93 |
| <b>N-methylproline</b>                               | Amino Acid   | Urea cycle; Arginine and Proline Metabolism      | -0.12 | 0.66 | 0.93 |
| <b>gamma-glutamylalanine</b>                         | Peptide      | Gamma-glutamyl Amino Acid                        | 0.04  | 0.66 | 0.93 |
| <b>1-stearoyl-GPI (18:0)</b>                         | Lipid        | Lysolipid                                        | -0.04 | 0.67 | 0.93 |
| <b>myristate (14:0)</b>                              | Lipid        | Long Chain Fatty Acid                            | 0.04  | 0.67 | 0.93 |
| <b>hippurate</b>                                     | Xenobiotics  | Benzoate Metabolism                              | 0.10  | 0.67 | 0.93 |
| <b>1-stearoylglycerol (18:0)</b>                     | Lipid        | Monoacylglycerol                                 | 0.13  | 0.67 | 0.93 |
| <b>arabitol</b>                                      | Carbohydrate | Pentose Metabolism                               | 0.04  | 0.67 | 0.93 |
| <b>glycocholate</b>                                  | Lipid        | Primary Bile Acid Metabolism                     | 0.12  | 0.68 | 0.93 |
| <b>isoleucylglycine</b>                              | Peptide      | Dipeptide                                        | 0.10  | 0.68 | 0.93 |
| <b>O-methylcatechol sulfate</b>                      | Xenobiotics  | Benzoate Metabolism                              | 0.09  | 0.68 | 0.93 |
| <b>dimethylglycine</b>                               | Amino Acid   | Glycine, Serine and Threonine Metabolism         | -0.04 | 0.68 | 0.93 |
| <b>1-arachidonoyl-GPI* (20:4)*</b>                   | Lipid        | Lysolipid                                        | 0.03  | 0.68 | 0.93 |
| <b>thyroxine</b>                                     | Amino Acid   | Phenylalanine and Tyrosine Metabolism            | 0.12  | 0.68 | 0.93 |
| <b>4-androsten-3beta,17beta-diol monosulfate (1)</b> | Lipid        | Steroid                                          | -0.09 | 0.69 | 0.93 |
| <b>hypotaurine</b>                                   | Amino Acid   | Methionine, Cysteine, SAM and Taurine Metabolism | -0.09 | 0.69 | 0.93 |
| <b>methylpalmitate (15 or 2)</b>                     | Lipid        | Fatty Acid, Branched                             | 0.04  | 0.69 | 0.93 |
| <b>hydantoin-5-propionic acid</b>                    | Amino Acid   | Histidine Metabolism                             | 0.10  | 0.69 | 0.93 |
| <b>dihomolinolenate (20:3n3 or 3n6)</b>              | Lipid        | Polyunsaturated Fatty Acid (n3 and n6)           | 0.02  | 0.70 | 0.94 |
| <b>1-arachidoyl-GPC (20:0)</b>                       | Lipid        | Lysolipid                                        | 0.13  | 0.70 | 0.94 |
| <b>2-hydroxybutyrate (AHB)</b>                       | Amino Acid   | Methionine, Cysteine, SAM and Taurine Metabolism | 0.04  | 0.70 | 0.94 |
| <b>tyramine O-sulfate</b>                            | Amino Acid   | Phenylalanine and Tyrosine Metabolism            | 0.11  | 0.70 | 0.94 |



|                                                       |                        |                                                      |       |      |      |
|-------------------------------------------------------|------------------------|------------------------------------------------------|-------|------|------|
| <b>pelargonate (9:0)</b>                              | Lipid                  | Medium Chain Fatty Acid                              | -0.02 | 0.71 | 0.94 |
| <b>valylarginine</b>                                  | Peptide                | Dipeptide                                            | 0.10  | 0.71 | 0.94 |
| <b>histidyltryptophan</b>                             | Peptide                | Dipeptide                                            | -0.08 | 0.71 | 0.94 |
| <b>4-hydroxychlorothalonil</b>                        | Xenobiotics            | Chemical                                             | 0.06  | 0.71 | 0.94 |
| <b>propionylcarnitine (C3)</b>                        | Lipid                  | Fatty Acid Metabolism (also BCAA Metabolism)         | 0.03  | 0.71 | 0.94 |
| <b>palmitoyl-linoleoyl-glycerophosphocholine (1)*</b> | Lipid                  | Lysolipid                                            | 0.03  | 0.71 | 0.94 |
| <b>glycerate</b>                                      | Carbohydrate           | Glycolysis, Gluconeogenesis, and Pyruvate Metabolism | 0.03  | 0.71 | 0.94 |
| <b>5-methyluridine (ribothymidine)</b>                | Nucleotide             | Pyrimidine Metabolism, Uracil containing             | -0.02 | 0.71 | 0.94 |
| <b>5-HETE</b>                                         | Lipid                  | Eicosanoid                                           | 0.07  | 0.72 | 0.94 |
| <b>N2,N2-dimethylguanosine</b>                        | Nucleotide             | Purine Metabolism, Guanine containing                | 0.02  | 0.72 | 0.94 |
| <b>2-oleoyl-GPC* (18:1)*</b>                          | Lipid                  | Lysolipid                                            | 0.04  | 0.72 | 0.94 |
| <b>indolelactate</b>                                  | Amino Acid             | Tryptophan Metabolism                                | 0.03  | 0.72 | 0.94 |
| <b>TL20:0 (arachidic acid)</b>                        | Lipid                  | Mole % Total Fatty Acid                              | -0.03 | 0.72 | 0.94 |
| <b>3-hydroxyisobutyrate</b>                           | Amino Acid             | Leucine, Isoleucine and Valine Metabolism            | -0.04 | 0.72 | 0.94 |
| <b>phenylalanyltryptophan</b>                         | Peptide                | Dipeptide                                            | 0.06  | 0.72 | 0.94 |
| <b>ADSGEGDFXAEGGGVR*</b>                              | Peptide                | Fibrinogen Cleavage Peptide                          | 0.04  | 0.72 | 0.94 |
| <b>4-methylcatechol sulfate</b>                       | Xenobiotics            | Benzoate Metabolism                                  | -0.09 | 0.72 | 0.94 |
| <b>3,7-dimethylurate</b>                              | Xenobiotics            | Xanthine Metabolism                                  | -0.12 | 0.72 | 0.94 |
| <b>4-hydroxybenzoate</b>                              | Xenobiotics            | Benzoate Metabolism                                  | 0.16  | 0.72 | 0.94 |
| <b>TL20:2n6 (eicosadienoic acid)</b>                  | Lipid                  | Mole % Total Fatty Acid                              | 0.03  | 0.73 | 0.94 |
| <b>fumarate</b>                                       | Energy                 | TCA Cycle                                            | -0.03 | 0.73 | 0.95 |
| <b>2'-deoxyuridine</b>                                | Nucleotide             | Pyrimidine Metabolism, Uracil containing             | -0.05 | 0.74 | 0.95 |
| <b>linoleoylcarnitine*</b>                            | Lipid                  | Fatty Acid Metabolism(Acyl Carnitine)                | 0.05  | 0.74 | 0.95 |
| <b>isobutyrylcarnitine (C4)</b>                       | Amino Acid             | Leucine, Isoleucine and Valine Metabolism            | -0.04 | 0.74 | 0.95 |
| <b>trigonelline (N'-methylnicotinate)</b>             | Cofactors and Vitamins | Nicotinate and Nicotinamide Metabolism               | -0.08 | 0.75 | 0.95 |
| <b>chenodeoxycholate</b>                              | Lipid                  | Primary Bile Acid Metabolism                         | 0.09  | 0.75 | 0.95 |
| <b>phenylcarnitine*</b>                               | Xenobiotics            | Chemical                                             | 0.11  | 0.75 | 0.95 |
| <b>3-methylxanthine</b>                               | Xenobiotics            | Xanthine Metabolism                                  | 0.11  | 0.75 | 0.95 |
| <b>N-formylmethionine</b>                             | Amino Acid             | Methionine, Cysteine, SAM and Taurine Metabolism     | 0.02  | 0.75 | 0.95 |
| <b>serylalanine</b>                                   | Peptide                | Dipeptide                                            | 0.05  | 0.75 | 0.95 |
| <b>sphingosine 1-phosphate</b>                        | Lipid                  | Sphingolipid Metabolism                              | -0.02 | 0.76 | 0.95 |
| <b>campesterol</b>                                    | Lipid                  | Sterol                                               | 0.05  | 0.76 | 0.95 |
| <b>catechol sulfate</b>                               | Xenobiotics            | Benzoate Metabolism                                  | -0.07 | 0.76 | 0.95 |
| <b>3-hydroxylaurate</b>                               | Lipid                  | Fatty Acid, Monohydroxy                              | -0.03 | 0.76 | 0.95 |
| <b>oleate (18:1n9)</b>                                | Lipid                  | Long Chain Fatty Acid                                | -0.03 | 0.76 | 0.95 |

|                                                          |                        |                                                  |       |      |      |
|----------------------------------------------------------|------------------------|--------------------------------------------------|-------|------|------|
| <b>palmitoyl-palmitoyl-glycerophosphocholine (1)*</b>    | Lipid                  | Lysolipid                                        | 0.04  | 0.76 | 0.95 |
| <b>adenosine 3',5'-cyclic monophosphate (cAMP)</b>       | Nucleotide             | Purine Metabolism, Adenine containing            | -0.07 | 0.76 | 0.95 |
| <b>5alpha-pregnan-3beta,20alpha-diol monosulfate (2)</b> | Lipid                  | Steroid                                          | -0.11 | 0.76 | 0.95 |
| <b>1-eicosadienoyl-GPC* (20:2)*</b>                      | Lipid                  | Lysolipid                                        | -0.04 | 0.77 | 0.95 |
| <b>N-acetylalanine</b>                                   | Amino Acid             | Alanine and Aspartate Metabolism                 | 0.01  | 0.77 | 0.95 |
| <b>stearoyl-arachidonoyl-glycerophosphocholine (2)*</b>  | Lipid                  | Lysolipid                                        | -0.02 | 0.77 | 0.95 |
| <b>carnitine</b>                                         | Lipid                  | Carnitine Metabolism                             | -0.01 | 0.77 | 0.95 |
| <b>pyroglutamylvaline</b>                                | Peptide                | Dipeptide                                        | 0.03  | 0.77 | 0.95 |
| <b>2-hydroxydecanoate</b>                                | Lipid                  | Fatty Acid, Monohydroxy                          | 0.04  | 0.78 | 0.95 |
| <b>pregnenolone sulfate</b>                              | Lipid                  | Steroid                                          | -0.06 | 0.78 | 0.95 |
| <b>salicyluric glucuronide*</b>                          | Xenobiotics            | Drug                                             | 0.16  | 0.78 | 0.95 |
| <b>TL22:5n6 (osbond acid)</b>                            | Lipid                  | Mole % Total Fatty Acid                          | 0.03  | 0.78 | 0.95 |
| <b>laurylcarnitine (C12)</b>                             | Lipid                  | Fatty Acid Metabolism(Acyl Carnitine)            | 0.03  | 0.79 | 0.95 |
| <b>N1-Methyl-2-pyridone-5-carboxamide</b>                | Cofactors and Vitamins | Nicotinate and Nicotinamide Metabolism           | 0.04  | 0.79 | 0.95 |
| <b>2-stearoylglycerophosphoinositol*</b>                 | Lipid                  | Lysolipid                                        | -0.05 | 0.79 | 0.95 |
| <b>cysteine</b>                                          | Amino Acid             | Methionine, Cysteine, SAM and Taurine Metabolism | 0.03  | 0.79 | 0.95 |
| <b>eicosenoate (20:1n9 or 1n11)</b>                      | Lipid                  | Long Chain Fatty Acid                            | 0.03  | 0.79 | 0.95 |
| <b>oleoyl sphingomyelin</b>                              | Lipid                  | Sphingolipid Metabolism                          | 0.02  | 0.79 | 0.95 |
| <b>phenylacetate</b>                                     | Amino Acid             | Phenylalanine and Tyrosine Metabolism            | -0.04 | 0.79 | 0.95 |
| <b>N-acetylalliin</b>                                    | Xenobiotics            | Food Component/Plant                             | 0.11  | 0.79 | 0.95 |
| <b>1-methylurate</b>                                     | Xenobiotics            | Xanthine Metabolism                              | -0.07 | 0.79 | 0.95 |
| <b>3-ureidopropionate</b>                                | Nucleotide             | Pyrimidine Metabolism, Uracil containing         | 0.03  | 0.79 | 0.95 |
| <b>N-acetylvaline</b>                                    | Amino Acid             | Leucine, Isoleucine and Valine Metabolism        | -0.01 | 0.80 | 0.95 |
| <b>erucate (22:1n9)</b>                                  | Lipid                  | Long Chain Fatty Acid                            | 0.03  | 0.80 | 0.95 |
| <b>isovalerylcarnitine (C5)</b>                          | Amino Acid             | Leucine, Isoleucine and Valine Metabolism        | 0.03  | 0.80 | 0.95 |
| <b>taurocholate</b>                                      | Lipid                  | Primary Bile Acid Metabolism                     | -0.10 | 0.80 | 0.95 |
| <b>dihydroorotate</b>                                    | Nucleotide             | Pyrimidine Metabolism, Orotate containing        | 0.06  | 0.80 | 0.96 |
| <b>gamma-glutamylisoleucine*</b>                         | Peptide                | Gamma-glutamyl Amino Acid                        | 0.02  | 0.80 | 0.96 |
| <b>gamma-glutamylglutamate</b>                           | Peptide                | Gamma-glutamyl Amino Acid                        | 0.04  | 0.81 | 0.96 |
| <b>aspartylleucine</b>                                   | Peptide                | Dipeptide                                        | 0.04  | 0.81 | 0.96 |
| <b>decanoylcarnitine (C10)</b>                           | Lipid                  | Fatty Acid Metabolism(Acyl Carnitine)            | -0.02 | 0.82 | 0.97 |
| <b>hexanoylcarnitine (C6)</b>                            | Lipid                  | Fatty Acid Metabolism(Acyl Carnitine)            | -0.02 | 0.82 | 0.97 |
| <b>2-hydroxyisobutyrate</b>                              | Xenobiotics            | Chemical                                         | 0.02  | 0.82 | 0.97 |

|                                                      |                        |                                            |       |      |      |
|------------------------------------------------------|------------------------|--------------------------------------------|-------|------|------|
| <b>1-arachidonoyl glycerophosphate</b>               | Lipid                  | Lysolipid                                  | 0.03  | 0.82 | 0.97 |
| <b>tyrosylglutamine</b>                              | Peptide                | Dipeptide                                  | 0.04  | 0.84 | 0.97 |
| <b>gamma-tocopherol</b>                              | Cofactors and Vitamins | Tocopherol Metabolism                      | 0.03  | 0.84 | 0.97 |
| <b>thymol sulfate</b>                                | Xenobiotics            | Food Component/Plant                       | 0.09  | 0.84 | 0.97 |
| <b>N3-methyluridine</b>                              | Nucleotide             | Pyrimidine Metabolism, Uracil containing   | -0.03 | 0.84 | 0.97 |
| <b>glycodeoxycholate</b>                             | Lipid                  | Secondary Bile Acid Metabolism             | 0.09  | 0.84 | 0.97 |
| <b>13-methylmyristic acid</b>                        | Lipid                  | Fatty Acid, Branched                       | 0.02  | 0.84 | 0.97 |
| <b>2,3-dihydroxyisovalerate</b>                      | Xenobiotics            | Food Component/Plant                       | 0.07  | 0.84 | 0.97 |
| <b>3-methoxycatechol sulfate (2)</b>                 | Xenobiotics            | Benzoate Metabolism                        | -0.06 | 0.85 | 0.97 |
| <b>tryptophylglutamate</b>                           | Peptide                | Dipeptide                                  | 0.08  | 0.85 | 0.97 |
| <b>glycine</b>                                       | Amino Acid             | Glycine, Serine and Threonine Metabolism   | -0.02 | 0.85 | 0.97 |
| <b>fructose</b>                                      | Carbohydrate           | Fructose, Mannose and Galactose Metabolism | -0.02 | 0.85 | 0.97 |
| <b>threitol</b>                                      | Carbohydrate           | Pentose Metabolism                         | 0.02  | 0.85 | 0.97 |
| <b>1-docosapentaenoyl-GPC* (22:5n6)*</b>             | Lipid                  | Lysolipid                                  | -0.06 | 0.85 | 0.97 |
| <b>2-hydroxyhippurate (salicylurate)</b>             | Xenobiotics            | Benzoate Metabolism                        | -0.08 | 0.85 | 0.97 |
| <b>glycylglycine</b>                                 | Peptide                | Dipeptide                                  | -0.09 | 0.85 | 0.97 |
| <b>epiandrosterone sulfate</b>                       | Lipid                  | Steroid                                    | -0.05 | 0.85 | 0.97 |
| <b>threonylphenylalanine</b>                         | Peptide                | Dipeptide                                  | 0.08  | 0.85 | 0.97 |
| <b>alpha-glutamyltyrosine</b>                        | Peptide                | Dipeptide                                  | 0.06  | 0.85 | 0.97 |
| <b>glycochenodeoxycholate</b>                        | Lipid                  | Primary Bile Acid Metabolism               | -0.05 | 0.85 | 0.97 |
| <b>imidazole propionate</b>                          | Amino Acid             | Histidine Metabolism                       | -0.04 | 0.86 | 0.98 |
| <b>serylleucine</b>                                  | Peptide                | Dipeptide                                  | -0.07 | 0.86 | 0.98 |
| <b>10-heptadecenoate (17:1n7)</b>                    | Lipid                  | Long Chain Fatty Acid                      | 0.02  | 0.86 | 0.98 |
| <b>glycoursodeoxycholate</b>                         | Lipid                  | Secondary Bile Acid Metabolism             | -0.06 | 0.87 | 0.98 |
| <b>TL20:4n6 (arachidonic acid)</b>                   | Lipid                  | Mole % Total Fatty Acid                    | 0.01  | 0.87 | 0.98 |
| <b>1-methylhistidine</b>                             | Amino Acid             | Histidine Metabolism                       | -0.02 | 0.88 | 0.98 |
| <b>N-acetylhistidine</b>                             | Amino Acid             | Histidine Metabolism                       | 0.03  | 0.88 | 0.98 |
| <b>tryptophan betaine</b>                            | Amino Acid             | Tryptophan Metabolism                      | -0.04 | 0.88 | 0.98 |
| <b>valerylcarnitine (C5)</b>                         | Lipid                  | Fatty Acid Metabolism(Acyl Carnitine)      | -0.06 | 0.88 | 0.98 |
| <b>ribose</b>                                        | Carbohydrate           | Pentose Metabolism                         | 0.03  | 0.88 | 0.98 |
| <b>myo-inositol</b>                                  | Lipid                  | Inositol Metabolism                        | 0.01  | 0.89 | 0.98 |
| <b>stearoyl-linoleoyl-glycerophosphocholine (2)*</b> | Lipid                  | Lysolipid                                  | 0.01  | 0.89 | 0.98 |
| <b>gamma-glutamylleucine</b>                         | Peptide                | Gamma-glutamyl Amino Acid                  | -0.01 | 0.89 | 0.98 |
| <b>3-hydroxy-2-ethylpropionate</b>                   | Amino Acid             | Leucine, Isoleucine and Valine Metabolism  | 0.01  | 0.89 | 0.98 |
| <b>cis-Cyclo[L-ala-L-Pro]</b>                        | Peptide                | Dipeptide                                  | 0.01  | 0.89 | 0.98 |

|                                              |                        |                                                      |       |      |      |
|----------------------------------------------|------------------------|------------------------------------------------------|-------|------|------|
| <b>N6-carbamoylthreonyladenosine</b>         | Nucleotide             | Purine Metabolism, Adenine containing                | 0.01  | 0.89 | 0.98 |
| <b>N-6-trimethyllysine</b>                   | Amino Acid             | Lysine Metabolism                                    | -0.02 | 0.90 | 0.98 |
| <b>N-acetylmethionine</b>                    | Amino Acid             | Methionine, Cysteine, SAM and Taurine Metabolism     | -0.02 | 0.90 | 0.98 |
| <b>5-acetylamino-6-amino-3-methyluracil</b>  | Xenobiotics            | Xanthine Metabolism                                  | 0.06  | 0.90 | 0.98 |
| <b>3-phenylpropionate (hydrocinnamate)</b>   | Amino Acid             | Phenylalanine and Tyrosine Metabolism                | -0.04 | 0.90 | 0.98 |
| <b>7-methylxanthine</b>                      | Xenobiotics            | Xanthine Metabolism                                  | -0.04 | 0.90 | 0.98 |
| <b>1-heptadecanoyl-GPC (17:0)</b>            | Lipid                  | Lysolipid                                            | 0.02  | 0.90 | 0.98 |
| <b>betonicine</b>                            | Xenobiotics            | Food Component/Plant                                 | 0.07  | 0.90 | 0.98 |
| <b>bilirubin (E,E)*</b>                      | Cofactors and Vitamins | Hemoglobin and Porphyrin Metabolism                  | -0.02 | 0.91 | 0.98 |
| <b>13-HODE + 9-HODE</b>                      | Lipid                  | Fatty Acid, Monohydroxy                              | 0.02  | 0.91 | 0.98 |
| <b>glutarate (pentanedioate)</b>             | Amino Acid             | Lysine Metabolism                                    | -0.02 | 0.91 | 0.98 |
| <b>glycylphenylalanine</b>                   | Peptide                | Dipeptide                                            | 0.03  | 0.91 | 0.98 |
| <b>laurate (12:0)</b>                        | Lipid                  | Medium Chain Fatty Acid                              | -0.01 | 0.91 | 0.98 |
| <b>maltose</b>                               | Carbohydrate           | Glycogen Metabolism                                  | 0.03  | 0.91 | 0.98 |
| <b>N-oleoyltaurine</b>                       | Lipid                  | Endocannabinoid                                      | -0.03 | 0.91 | 0.98 |
| <b>ergothioneine</b>                         | Xenobiotics            | Food Component/Plant                                 | 0.02  | 0.91 | 0.98 |
| <b>delta-tocopherol</b>                      | Cofactors and Vitamins | Tocopherol Metabolism                                | 0.03  | 0.92 | 0.98 |
| <b>caprate (10:0)</b>                        | Lipid                  | Medium Chain Fatty Acid                              | 0.01  | 0.92 | 0.98 |
| <b>2-arachidonoylglycerophosphoinositol*</b> | Lipid                  | Lysolipid                                            | -0.02 | 0.92 | 0.98 |
| <b>xanthine</b>                              | Nucleotide             | Purine Metabolism, (Hypo)Xanthine/Inosine containing | 0.01  | 0.92 | 0.98 |
| <b>1-oleoyl-GPI (18:1)*</b>                  | Lipid                  | Lysolipid                                            | 0.01  | 0.92 | 0.98 |
| <b>acisoga</b>                               | Amino Acid             | Polyamine Metabolism                                 | 0.01  | 0.92 | 0.98 |
| <b>2-aminoadipate</b>                        | Amino Acid             | Lysine Metabolism                                    | 0.01  | 0.92 | 0.98 |
| <b>1-oleoylplasmylethanolamine*</b>          | Lipid                  | Lysolipid                                            | 0.01  | 0.92 | 0.98 |
| <b>deoxycholate</b>                          | Lipid                  | Secondary Bile Acid Metabolism                       | 0.02  | 0.92 | 0.98 |
| <b>pyridoxal</b>                             | Cofactors and Vitamins | Vitamin B6 Metabolism                                | -0.04 | 0.92 | 0.98 |
| <b>linoleate (18:2n6)</b>                    | Lipid                  | Polyunsaturated Fatty Acid (n3 and n6)               | -0.01 | 0.94 | 0.99 |
| <b>N-(2-furoyl)glycine</b>                   | Xenobiotics            | Food Component/Plant                                 | -0.01 | 0.94 | 0.99 |
| <b>docosatrienoate (22:3n3)</b>              | Lipid                  | Polyunsaturated Fatty Acid (n3 and n6)               | -0.01 | 0.94 | 0.99 |
| <b>glutaroylcarnitine (C5)</b>               | Amino Acid             | Lysine Metabolism                                    | 0.01  | 0.94 | 0.99 |
| <b>TL18:1n7 (avaccenic acid)</b>             | Lipid                  | Mole % Total Fatty Acid                              | 0.003 | 0.94 | 0.99 |
| <b>succinylcarnitine (C4)</b>                | Energy                 | TCA Cycle                                            | -0.01 | 0.94 | 0.99 |
| <b>1-palmitoleoyl-GPI* (16:1)*</b>           | Lipid                  | Lysolipid                                            | 0.03  | 0.94 | 0.99 |

|                                                            |              |                                            |        |      |      |
|------------------------------------------------------------|--------------|--------------------------------------------|--------|------|------|
| <b>palmitoyl sphingomyelin</b>                             | Lipid        | Sphingolipid Metabolism                    | 0.003  | 0.95 | 0.99 |
| <b>gamma-glutamyllysine</b>                                | Peptide      | Gamma-glutamyl Amino Acid                  | -0.01  | 0.95 | 0.99 |
| <b>1-linoleoyl-GPI* (18:2)*</b>                            | Lipid        | Lysolipid                                  | -0.01  | 0.95 | 0.99 |
| <b>3-methylglutaryl carnitine (1)</b>                      | Amino Acid   | Lysine Metabolism                          | 0.01   | 0.95 | 0.99 |
| <b>N-acetylserine</b>                                      | Amino Acid   | Glycine, Serine and Threonine Metabolism   | 0.003  | 0.96 | 0.99 |
| <b>3-methylhistidine</b>                                   | Amino Acid   | Histidine Metabolism                       | 0.01   | 0.96 | 0.99 |
| <b>gamma-glutamyl-2-aminobutyrate</b>                      | Peptide      | Gamma-glutamyl Amino Acid                  | 0.01   | 0.96 | 0.99 |
| <b>gamma-glutamylvaline</b>                                | Peptide      | Gamma-glutamyl Amino Acid                  | 0.003  | 0.96 | 0.99 |
| <b>DSGEGDFXAEGGGVR*</b>                                    | Peptide      | Fibrinogen Cleavage Peptide                | -0.01  | 0.96 | 0.99 |
| <b>dihomolinoleate (20:2n6)</b>                            | Lipid        | Polyunsaturated Fatty Acid (n3 and n6)     | 0.004  | 0.97 | 0.99 |
| <b>TL24:0 (lignoceric acid)</b>                            | Lipid        | Mole % Total Fatty Acid                    | 0.01   | 0.97 | 0.99 |
| <b>3-(4-hydroxyphenyl)lactate (HPLA)</b>                   | Amino Acid   | Phenylalanine and Tyrosine Metabolism      | -0.003 | 0.97 | 0.99 |
| <b>p-cresol-glucuronide*</b>                               | Amino Acid   | Phenylalanine and Tyrosine Metabolism      | 0.02   | 0.97 | 0.99 |
| <b>1-methyladenosine</b>                                   | Nucleotide   | Purine Metabolism, Adenine containing      | -0.002 | 0.97 | 0.99 |
| <b>5alpha-androstan-3alpha,17beta-diol monosulfate (1)</b> | Lipid        | Steroid                                    | 0.01   | 0.97 | 0.99 |
| <b>xylose</b>                                              | Carbohydrate | Pentose Metabolism                         | 0.01   | 0.97 | 0.99 |
| <b>linolenate (18:3n3 or 3n6)</b>                          | Lipid        | Polyunsaturated Fatty Acid (n3 and n6)     | -0.004 | 0.97 | 0.99 |
| <b>creatinine</b>                                          | Amino Acid   | Creatine Metabolism                        | -0.002 | 0.97 | 0.99 |
| <b>adenosine</b>                                           | Nucleotide   | Purine Metabolism, Adenine containing      | -0.01  | 0.97 | 0.99 |
| <b>xylonate</b>                                            | Carbohydrate | Pentose Metabolism                         | -0.01  | 0.97 | 0.99 |
| <b>1-methylxanthine</b>                                    | Xenobiotics  | Xanthine Metabolism                        | -0.01  | 0.97 | 0.99 |
| <b>lysine</b>                                              | Amino Acid   | Lysine Metabolism                          | 0.002  | 0.97 | 0.99 |
| <b>coprostanol</b>                                         | Lipid        | Sterol                                     | -0.01  | 0.97 | 0.99 |
| <b>palmitoleate (16:1n7)</b>                               | Lipid        | Long Chain Fatty Acid                      | -0.004 | 0.98 | 0.99 |
| <b>beta-hydroxyisovalerate</b>                             | Amino Acid   | Leucine, Isoleucine and Valine Metabolism  | 0.003  | 0.98 | 0.99 |
| <b>oleoyl-linoleoyl-glycerophosphocholine (1)*</b>         | Lipid        | Lysolipid                                  | -0.001 | 0.99 | 0.99 |
| <b>6-oxopiperidine-2-carboxylic acid</b>                   | Xenobiotics  | Drug                                       | 0.001  | 0.99 | 0.99 |
| <b>palmitoyl ethanolamide</b>                              | Lipid        | Endocannabinoid                            | -0.001 | 0.99 | 0.99 |
| <b>etiocholanolone glucuronide</b>                         | Lipid        | Steroid                                    | -0.004 | 0.99 | 0.99 |
| <b>myristoleoyl carnitine*</b>                             | Lipid        | Fatty Acid Metabolism(Acyl Carnitine)      | -0.002 | 0.99 | 0.99 |
| <b>sorbitol</b>                                            | Carbohydrate | Fructose, Mannose and Galactose Metabolism | -0.001 | 1.00 | 1.00 |
| <b>palmitoyl-palmitoyl-glycerophosphocholine (2)*</b>      | Lipid        | Lysolipid                                  | 0.0003 | 0.97 | 1.00 |

\*Covariates: age, sex, diabetes, hypertension, BMI, and liver fibrosis stage

TCA = tricarboxylic acid cycle; GPE = Glycerophosphoethanolamine; GPC = Glycerophosphocholine; SAM = S-Adenosyl methionine

**Table S5: Diastolic dysfunction full results\***

| Metabolite                                        | Pathway                | Sub-Pathway                                      | Log Fold change | Unadjusted p-value | Adjusted p-value |
|---------------------------------------------------|------------------------|--------------------------------------------------|-----------------|--------------------|------------------|
| azelate (nonanedioate; C9)                        | Lipid                  | Fatty Acid, Dicarboxylate                        | -0.33           | 0.001              | 0.49             |
| 1-arachidonoyl-GPE* (20:4)*                       | Lipid                  | Lysolipid                                        | 0.21            | 0.003              | 0.49             |
| 1-arachidonylglycerol                             | Lipid                  | Monoacylglycerol                                 | 0.25            | 0.004              | 0.49             |
| 2-arachidonoyl-GPC* (20:4)*                       | Lipid                  | Lysolipid                                        | 0.29            | 0.01               | 0.49             |
| 1-arachidonoyl-GPC* (20:4)*                       | Lipid                  | Lysolipid                                        | 0.24            | 0.01               | 0.49             |
| palmitoyl-arachidonoyl-glycerophosphocholine (2)* | Lipid                  | Lysolipid                                        | 0.17            | 0.01               | 0.49             |
| TL18:3n6 (g-linolenic acid)                       | Lipid                  | Mole % Total Fatty Acid                          | 0.22            | 0.01               | 0.49             |
| citrate                                           | Energy                 | TCA Cycle                                        | -0.17           | 0.01               | 0.49             |
| 1-docosahexaenoylglycerophosphoethanolamine*      | Lipid                  | Lysolipid                                        | 0.26            | 0.01               | 0.49             |
| 2-palmitoleoyl-GPC* (16:1)*                       | Lipid                  | Lysolipid                                        | 0.48            | 0.01               | 0.49             |
| N6-acetyllsine                                    | Amino Acid             | Lysine Metabolism                                | 0.13            | 0.01               | 0.49             |
| 2-arachidonoyl-GPE* (20:4)*                       | Lipid                  | Lysolipid                                        | 0.47            | 0.01               | 0.49             |
| xylitol                                           | Carbohydrate           | Pentose Metabolism                               | 0.40            | 0.01               | 0.49             |
| sulfate*                                          | Xenobiotics            | Chemical                                         | 0.09            | 0.01               | 0.59             |
| myristoyl sphingomyelin*                          | Lipid                  | Sphingolipid Metabolism                          | 0.12            | 0.01               | 0.59             |
| 1-palmitoyl-GPC (16:0)                            | Lipid                  | Lysolipid                                        | 0.19            | 0.01               | 0.59             |
| cysteine s-sulfate                                | Amino Acid             | Methionine, Cysteine, SAM and Taurine Metabolism | -0.18           | 0.02               | 0.59             |
| S-methylcysteine                                  | Amino Acid             | Methionine, Cysteine, SAM and Taurine Metabolism | -0.23           | 0.02               | 0.59             |
| ethylmalonate                                     | Amino Acid             | Leucine, Isoleucine and Valine Metabolism        | 0.25            | 0.02               | 0.64             |
| orotate                                           | Nucleotide             | Pyrimidine Metabolism, Orotate containing        | 0.37            | 0.02               | 0.64             |
| orotidine                                         | Nucleotide             | Pyrimidine Metabolism, Orotate containing        | 0.50            | 0.02               | 0.65             |
| 2-myristoyl-GPC* (14:0)*                          | Lipid                  | Lysolipid                                        | 0.44            | 0.02               | 0.67             |
| 1-myristoyl-GPC (14:0)                            | Lipid                  | Lysolipid                                        | 0.31            | 0.02               | 0.67             |
| TL20:3n9 (mead acid)                              | Lipid                  | Mole % Total Fatty Acid                          | 0.30            | 0.03               | 0.67             |
| 1-stearoyl-GPE (18:0)                             | Lipid                  | Lysolipid                                        | 0.18            | 0.03               | 0.67             |
| adrenate (22:4n6)                                 | Lipid                  | Polyunsaturated Fatty Acid (n3 and n6)           | 0.18            | 0.03               | 0.67             |
| 1-linolenylglycerophosphocholine (18:3n3)*        | Lipid                  | Lysolipid                                        | 0.27            | 0.03               | 0.67             |
| arachidonate (20:4n6)                             | Lipid                  | Polyunsaturated Fatty Acid (n3 and n6)           | 0.12            | 0.03               | 0.67             |
| biliverdin                                        | Cofactors and Vitamins | Hemoglobin and Porphyrin Metabolism              | -0.41           | 0.03               | 0.67             |
| 2-hydroxy-3-methylvalerate                        | Amino Acid             | Leucine, Isoleucine and Valine Metabolism        | 0.20            | 0.03               | 0.67             |

|                                                              |              |                                                      |       |      |      |
|--------------------------------------------------------------|--------------|------------------------------------------------------|-------|------|------|
| <b>alpha-ketoglutarate</b>                                   | Energy       | TCA Cycle                                            | 0.22  | 0.04 | 0.67 |
| <b>fucose</b>                                                | Carbohydrate | Pentose Metabolism                                   | 0.21  | 0.04 | 0.67 |
| <b>1-oleoyl-GPC (18:1)</b>                                   | Lipid        | Lysolipid                                            | 0.21  | 0.04 | 0.67 |
| <b>2-stearoylglycerophosphoethanolamine*</b>                 | Lipid        | Lysolipid                                            | 0.21  | 0.04 | 0.67 |
| <b>3-methylglutaconate</b>                                   | Amino Acid   | Leucine, Isoleucine and Valine Metabolism            | 0.31  | 0.04 | 0.67 |
| <b>1-palmitoleoyl-GPC* (16:1)*</b>                           | Lipid        | Lysolipid                                            | 0.26  | 0.04 | 0.67 |
| <b>2-palmitoyl-GPC* (16:0)*</b>                              | Lipid        | Lysolipid                                            | 0.20  | 0.04 | 0.67 |
| <b>hexadecanedioate (C16)</b>                                | Lipid        | Fatty Acid, Dicarboxylate                            | -0.25 | 0.04 | 0.67 |
| <b>1-stearoylglycerol (18:0)</b>                             | Lipid        | Monoacylglycerol                                     | 0.59  | 0.04 | 0.67 |
| <b>2'-deoxyuridine</b>                                       | Nucleotide   | Pyrimidine Metabolism, Uracil containing             | -0.27 | 0.04 | 0.67 |
| <b>2-docosahexaenoylglycerol*</b>                            | Lipid        | Monoacylglycerol                                     | 0.66  | 0.04 | 0.68 |
| <b>xanthosine</b>                                            | Nucleotide   | Purine Metabolism, (Hypo)Xanthine/Inosine containing | 0.21  | 0.04 | 0.68 |
| <b>1-eicosapentaenoylglycerophosphocholine (20:5n3)*</b>     | Lipid        | Lysolipid                                            | 0.36  | 0.05 | 0.68 |
| <b>3-methylglutaryl carnitine (2)</b>                        | Amino Acid   | Lysine Metabolism                                    | 0.31  | 0.05 | 0.68 |
| <b>methyl glucopyranoside (alpha + beta)</b>                 | Xenobiotics  | Food Component/Plant                                 | -0.58 | 0.05 | 0.70 |
| <b>N6-succinyladenosine</b>                                  | Nucleotide   | Purine Metabolism, Adenine containing                | 0.15  | 0.05 | 0.70 |
| <b>sphinganine</b>                                           | Lipid        | Sphingolipid Metabolism                              | 0.63  | 0.05 | 0.70 |
| <b>1-stearoyl-GPC (18:0)</b>                                 | Lipid        | Lysolipid                                            | 0.22  | 0.05 | 0.70 |
| <b>2-arachidonoyl glycerol</b>                               | Lipid        | Monoacylglycerol                                     | 0.20  | 0.05 | 0.70 |
| <b>5,6-dihydrothymine</b>                                    | Nucleotide   | Pyrimidine Metabolism, Thymine containing            | -0.15 | 0.06 | 0.72 |
| <b>phenylalanyl leucine</b>                                  | Peptide      | Dipeptide                                            | 0.57  | 0.06 | 0.72 |
| <b>1-oleoyl-GPE (18:1)</b>                                   | Lipid        | Lysolipid                                            | 0.16  | 0.06 | 0.72 |
| <b>3b-hydroxy-5-cholenoic acid</b>                           | Lipid        | Secondary Bile Acid Metabolism                       | -0.47 | 0.06 | 0.72 |
| <b>methionine sulfone</b>                                    | Amino Acid   | Methionine, Cysteine, SAM and Taurine Metabolism     | 0.27  | 0.06 | 0.72 |
| <b>stearoyl-arachidonoyl-glycerophosphoethanolamine (1)*</b> | Lipid        | Lysolipid                                            | 0.20  | 0.06 | 0.72 |
| <b>1-palmitoyl-GPE (16:0)</b>                                | Lipid        | Lysolipid                                            | 0.16  | 0.06 | 0.72 |
| <b>2-palmitoylglycerol (16:0)</b>                            | Lipid        | Monoacylglycerol                                     | 0.29  | 0.06 | 0.72 |
| <b>stearoyl-arachidonoyl-glycerophosphocholine (2)*</b>      | Lipid        | Lysolipid                                            | 0.13  | 0.07 | 0.72 |
| <b>1-stearoylplasmylethanolamine*</b>                        | Lipid        | Lysolipid                                            | 0.21  | 0.07 | 0.72 |
| <b>1-docosapentaenoyl-GPC* (22:5n3)*</b>                     | Lipid        | Lysolipid                                            | 0.20  | 0.07 | 0.72 |
| <b>N-acetylputrescine</b>                                    | Amino Acid   | Polyamine Metabolism                                 | 0.18  | 0.07 | 0.72 |



|                                                      |              |                                              |       |      |      |
|------------------------------------------------------|--------------|----------------------------------------------|-------|------|------|
| <b>lanosterol</b>                                    | Lipid        | Sterol                                       | -0.46 | 0.07 | 0.72 |
| <b>1-pentadecanoylglycerophosphocholine (15:0)*</b>  | Lipid        | Lysolipid                                    | 0.18  | 0.07 | 0.72 |
| <b>myristoylcarnitine</b>                            | Lipid        | Fatty Acid Metabolism(Acyl Carnitine)        | 0.24  | 0.07 | 0.72 |
| <b>1-docosahexaenoylglycerol</b>                     | Lipid        | Monoacylglycerol                             | 0.24  | 0.07 | 0.72 |
| <b>tetradecanedioate (C14)</b>                       | Lipid        | Fatty Acid, Dicarboxylate                    | -0.22 | 0.08 | 0.72 |
| <b>eugenol sulfate</b>                               | Xenobiotics  | Food Component/Plant                         | 0.71  | 0.08 | 0.72 |
| <b>2-oleoyl-GPC* (18:1)*</b>                         | Lipid        | Lysolipid                                    | 0.17  | 0.08 | 0.72 |
| <b>2-hydroxyisobutyrate</b>                          | Xenobiotics  | Chemical                                     | 0.17  | 0.08 | 0.72 |
| <b>propionylglycine (C3)</b>                         | Lipid        | Fatty Acid Metabolism (also BCAA Metabolism) | 0.21  | 0.08 | 0.72 |
| <b>2-stearoyl-GPC* (18:0)*</b>                       | Lipid        | Lysolipid                                    | 0.23  | 0.08 | 0.72 |
| <b>1-linolenoylglycerol</b>                          | Lipid        | Monoacylglycerol                             | 0.20  | 0.08 | 0.74 |
| <b>1-docosahexaenoyl-GPC* (22:6)*</b>                | Lipid        | Lysolipid                                    | 0.20  | 0.08 | 0.74 |
| <b>1-palmitoylplasmenylethanolamine *</b>            | Lipid        | Lysolipid                                    | 0.13  | 0.08 | 0.74 |
| <b>3-hydroxy-3-methylglutarate</b>                   | Lipid        | Mevalonate Metabolism                        | 0.12  | 0.09 | 0.74 |
| <b>leucylalanine</b>                                 | Peptide      | Dipeptide                                    | 0.41  | 0.09 | 0.74 |
| <b>caprylate (8:0)</b>                               | Lipid        | Medium Chain Fatty Acid                      | -0.11 | 0.09 | 0.74 |
| <b>indoleacetylglutamine</b>                         | Amino Acid   | Tryptophan Metabolism                        | 0.54  | 0.09 | 0.74 |
| <b>palmitoyl-linoleoylglycerophosphocholine (2)*</b> | Lipid        | Lysolipid                                    | -0.11 | 0.09 | 0.74 |
| <b>3-methoxytyrosine</b>                             | Amino Acid   | Phenylalanine and Tyrosine Metabolism        | -0.11 | 0.09 | 0.74 |
| <b>malonate (propanedioate)</b>                      | Lipid        | Fatty Acid Synthesis                         | -0.26 | 0.09 | 0.74 |
| <b>ribitol</b>                                       | Carbohydrate | Pentose Metabolism                           | 0.10  | 0.09 | 0.74 |
| <b>serylleucine</b>                                  | Peptide      | Dipeptide                                    | -0.62 | 0.09 | 0.74 |
| <b>benzoate</b>                                      | Xenobiotics  | Benzoate Metabolism                          | -0.11 | 0.10 | 0.79 |
| <b>1,2,3-benzenetriol sulfate (2)</b>                | Xenobiotics  | Chemical                                     | -0.74 | 0.10 | 0.79 |
| <b>erythronate*</b>                                  | Carbohydrate | Aminosugar Metabolism                        | 0.10  | 0.11 | 0.82 |
| <b>1-eicosatrienoyl-GPC* (20:3)*</b>                 | Lipid        | Lysolipid                                    | 0.16  | 0.11 | 0.84 |
| <b>2-eicosatrienoyl-GPC* (20:3)*</b>                 | Lipid        | Lysolipid                                    | 0.14  | 0.11 | 0.84 |
| <b>adenosine</b>                                     | Nucleotide   | Purine Metabolism, Adenine containing        | -0.28 | 0.12 | 0.84 |
| <b>3-methoxycatechol sulfate (1)</b>                 | Xenobiotics  | Benzoate Metabolism                          | -0.57 | 0.12 | 0.84 |
| <b>N-acetyltryptophan</b>                            | Amino Acid   | Tryptophan Metabolism                        | 0.17  | 0.12 | 0.84 |
| <b>glycylvaline</b>                                  | Peptide      | Dipeptide                                    | 0.58  | 0.12 | 0.84 |
| <b>phenyllactate (PLA)</b>                           | Amino Acid   | Phenylalanine and Tyrosine Metabolism        | 0.12  | 0.12 | 0.84 |
| <b>glutamine</b>                                     | Amino Acid   | Glutamate Metabolism                         | -0.06 | 0.12 | 0.84 |
| <b>dimethyl sulfone</b>                              | Xenobiotics  | Chemical                                     | 0.48  | 0.12 | 0.84 |

|                                                       |              |                                                  |       |      |      |
|-------------------------------------------------------|--------------|--------------------------------------------------|-------|------|------|
| <b>cytidine</b>                                       | Nucleotide   | Pyrimidine Metabolism, Cytidine containing       | 0.14  | 0.12 | 0.84 |
| <b>alpha-hydroxyisovalerate</b>                       | Amino Acid   | Leucine, Isoleucine and Valine Metabolism        | 0.18  | 0.13 | 0.85 |
| <b>1-oleoylplasmenylethanolamine*</b>                 | Lipid        | Lysolipid                                        | 0.15  | 0.13 | 0.86 |
| <b>phenylalanylserine</b>                             | Peptide      | Dipeptide                                        | -0.50 | 0.13 | 0.87 |
| <b>2-palmitoyl-GPE* (16:0)*</b>                       | Lipid        | Lysolipid                                        | 0.17  | 0.14 | 0.87 |
| <b>1-methyladenosine</b>                              | Nucleotide   | Purine Metabolism, Adenine containing            | 0.08  | 0.14 | 0.87 |
| <b>docosahexaenoate (DHA; 22:6n3)</b>                 | Lipid        | Polyunsaturated Fatty Acid (n3 and n6)           | 0.16  | 0.14 | 0.87 |
| <b>3-methyl catechol sulfate (1)</b>                  | Xenobiotics  | Benzoate Metabolism                              | 0.45  | 0.14 | 0.87 |
| <b>inositol 1-phosphate (I1P)</b>                     | Lipid        | Inositol Metabolism                              | 0.16  | 0.14 | 0.87 |
| <b>caproate (6:0)</b>                                 | Lipid        | Medium Chain Fatty Acid                          | -0.09 | 0.14 | 0.87 |
| <b>eicosenoyl sphingomyelin*</b>                      | Lipid        | Sphingolipid Metabolism                          | 0.12  | 0.14 | 0.87 |
| <b>tyrosylglutamate</b>                               | Peptide      | Dipeptide                                        | 0.38  | 0.14 | 0.87 |
| <b>3-hydroxy-2-ethylpropionate</b>                    | Amino Acid   | Leucine, Isoleucine and Valine Metabolism        | 0.11  | 0.14 | 0.87 |
| <b>palmitoyl-linoleoyl-glycerophosphocholine (1)*</b> | Lipid        | Lysolipid                                        | -0.10 | 0.14 | 0.87 |
| <b>stearoylcarnitine (C18)</b>                        | Lipid        | Fatty Acid Metabolism(Acyl Carnitine)            | 0.17  | 0.15 | 0.87 |
| <b>2-docosahexaenoyl-GPC* (22:6)*</b>                 | Lipid        | Lysolipid                                        | 0.21  | 0.16 | 0.89 |
| <b>pyroglutamylglutamine</b>                          | Peptide      | Dipeptide                                        | 0.24  | 0.16 | 0.89 |
| <b>3-indoxyl sulfate</b>                              | Amino Acid   | Tryptophan Metabolism                            | 0.21  | 0.16 | 0.89 |
| <b>eicosapentaenoate (EPA; 20:5n3)</b>                | Lipid        | Polyunsaturated Fatty Acid (n3 and n6)           | 0.21  | 0.16 | 0.89 |
| <b>cyclo(pro-pro)</b>                                 | Peptide      | Dipeptide                                        | 0.16  | 0.16 | 0.89 |
| <b>methyl indole-3-acetate</b>                        | Xenobiotics  | Food Component/Plant                             | 0.20  | 0.16 | 0.89 |
| <b>12-HETE</b>                                        | Lipid        | Eicosanoid                                       | -0.36 | 0.16 | 0.89 |
| <b>glutamate</b>                                      | Amino Acid   | Glutamate Metabolism                             | 0.11  | 0.17 | 0.89 |
| <b>aspartylphenylalanine</b>                          | Peptide      | Dipeptide                                        | 0.31  | 0.17 | 0.89 |
| <b>tyramine O-sulfate</b>                             | Amino Acid   | Phenylalanine and Tyrosine Metabolism            | 0.38  | 0.17 | 0.89 |
| <b>2-arachidonoylglycerophosphoinositol*</b>          | Lipid        | Lysolipid                                        | 0.29  | 0.17 | 0.89 |
| <b>3-methoxytyramine sulfate</b>                      | Amino Acid   | Phenylalanine and Tyrosine Metabolism            | 0.16  | 0.17 | 0.89 |
| <b>cysteine</b>                                       | Amino Acid   | Methionine, Cysteine, SAM and Taurine Metabolism | -0.14 | 0.18 | 0.89 |
| <b>glycolithocholate sulfate*</b>                     | Lipid        | Secondary Bile Acid Metabolism                   | -0.36 | 0.18 | 0.89 |
| <b>mannose</b>                                        | Carbohydrate | Fructose, Mannose and Galactose Metabolism       | 0.10  | 0.18 | 0.89 |
| <b>3-ureidopropionate</b>                             | Nucleotide   | Pyrimidine Metabolism, Uracil containing         | 0.13  | 0.18 | 0.89 |
| <b>dodecanedioate (C12)</b>                           | Lipid        | Fatty Acid, Dicarboxylate                        | -0.17 | 0.18 | 0.89 |

|                                                    |              |                                                  |       |      |      |
|----------------------------------------------------|--------------|--------------------------------------------------|-------|------|------|
| <b>N-methylproline</b>                             | Amino Acid   | Urea cycle; Arginine and Proline Metabolism      | -0.33 | 0.18 | 0.89 |
| <b>1,3-dimethylurate</b>                           | Xenobiotics  | Xanthine Metabolism                              | -0.55 | 0.18 | 0.89 |
| <b>1-arachidoyl-GPC (20:0)</b>                     | Lipid        | Lysolipid                                        | 0.42  | 0.19 | 0.89 |
| <b>1-eicosenoylglycerophosphocholine (20:1n9)*</b> | Lipid        | Lysolipid                                        | 0.19  | 0.19 | 0.89 |
| <b>phenylpyruvate</b>                              | Amino Acid   | Phenylalanine and Tyrosine Metabolism            | 0.10  | 0.19 | 0.89 |
| <b>palmitoylcarnitine (C16)</b>                    | Lipid        | Fatty Acid Metabolism(Acyl Carnitine)            | 0.14  | 0.19 | 0.89 |
| <b>docosapentaenoate (DPA; 22:5n3)</b>             | Lipid        | Polyunsaturated Fatty Acid (n3 and n6)           | 0.13  | 0.19 | 0.89 |
| <b>betaine</b>                                     | Amino Acid   | Glycine, Serine and Threonine Metabolism         | -0.08 | 0.19 | 0.89 |
| <b>TL20:4n6 (arachidonic acid)</b>                 | Lipid        | Mole % Total Fatty Acid                          | 0.09  | 0.19 | 0.89 |
| <b>kynurenate</b>                                  | Amino Acid   | Tryptophan Metabolism                            | -0.13 | 0.19 | 0.89 |
| <b>oleoylcarnitine (C18)</b>                       | Lipid        | Fatty Acid Metabolism(Acyl Carnitine)            | 0.16  | 0.19 | 0.89 |
| <b>octadecanedioate (C18)</b>                      | Lipid        | Fatty Acid, Dicarboxylate                        | -0.16 | 0.20 | 0.89 |
| <b>N2-methylguanosine</b>                          | Nucleotide   | Purine Metabolism, Guanine containing            | 0.13  | 0.20 | 0.89 |
| <b>TL20:2n6 (eicosadienoic acid)</b>               | Lipid        | Mole % Total Fatty Acid                          | 0.10  | 0.20 | 0.89 |
| <b>1-heptadecanoyl-GPC (17:0)</b>                  | Lipid        | Lysolipid                                        | 0.23  | 0.20 | 0.89 |
| <b>N6-methyladenosine</b>                          | Nucleotide   | Purine Metabolism, Adenine containing            | 0.13  | 0.20 | 0.89 |
| <b>5-HETE</b>                                      | Lipid        | Eicosanoid                                       | 0.22  | 0.20 | 0.89 |
| <b>dimethylarginine (ADMA + SDMA)</b>              | Amino Acid   | Urea cycle; Arginine and Proline Metabolism      | -0.04 | 0.20 | 0.89 |
| <b>cis-Cyclo[L-ala-L-Pro]</b>                      | Peptide      | Dipeptide                                        | 0.12  | 0.20 | 0.89 |
| <b>N-acetylmethionine</b>                          | Amino Acid   | Methionine, Cysteine, SAM and Taurine Metabolism | -0.20 | 0.20 | 0.89 |
| <b>gamma-glutamyllysine</b>                        | Peptide      | Gamma-glutamyl Amino Acid                        | 0.10  | 0.21 | 0.89 |
| <b>stearate (18:0)</b>                             | Lipid        | Long Chain Fatty Acid                            | 0.06  | 0.21 | 0.89 |
| <b>histidyltryptophan</b>                          | Peptide      | Dipeptide                                        | -0.26 | 0.21 | 0.89 |
| <b>TL20:5n3 (eicosapentaenoic acid)</b>            | Lipid        | Mole % Total Fatty Acid                          | 0.19  | 0.21 | 0.89 |
| <b>imidazole propionate</b>                        | Amino Acid   | Histidine Metabolism                             | 0.24  | 0.21 | 0.89 |
| <b>C-glycosyltryptophan</b>                        | Amino Acid   | Tryptophan Metabolism                            | 0.06  | 0.21 | 0.89 |
| <b>phenylacetylglutamine</b>                       | Amino Acid   | Phenylalanine and Tyrosine Metabolism            | 0.21  | 0.21 | 0.89 |
| <b>desmosterol</b>                                 | Lipid        | Sterol                                           | -0.21 | 0.21 | 0.89 |
| <b>glucuronate</b>                                 | Carbohydrate | Aminosugar Metabolism                            | 0.12  | 0.21 | 0.89 |
| <b>cyclo(gly-pro)</b>                              | Peptide      | Dipeptide                                        | 0.19  | 0.21 | 0.89 |
| <b>sphingomyelin</b>                               | Lipid        | Sphingolipid Metabolism                          | 0.09  | 0.21 | 0.89 |
| <b>4-hydroxyhippurate</b>                          | Xenobiotics  | Benzoate Metabolism                              | -0.24 | 0.22 | 0.89 |
| <b>TL18:2n6 (linoleic acid)</b>                    | Lipid        | Mole % Total Fatty Acid                          | -0.06 | 0.22 | 0.90 |

|                                                  |              |                                                      |       |      |      |
|--------------------------------------------------|--------------|------------------------------------------------------|-------|------|------|
| <b>16-hydroxypalmitate</b>                       | Lipid        | Fatty Acid, Monohydroxy                              | -0.09 | 0.22 | 0.92 |
| <b>allo-isoleucine</b>                           | Amino Acid   | Leucine, Isoleucine and Valine Metabolism            | -0.08 | 0.23 | 0.92 |
| <b>2-oleoyl-GPE* (18:1)*</b>                     | Lipid        | Lysolipid                                            | 0.36  | 0.23 | 0.92 |
| <b>docosapentaenoate (n6 DPA; 22:5n6)</b>        | Lipid        | Polyunsaturated Fatty Acid (n3 and n6)               | 0.09  | 0.23 | 0.92 |
| <b>9,10-DiHOME</b>                               | Lipid        | Fatty Acid, Dihydroxy                                | -0.25 | 0.23 | 0.92 |
| <b>TL22:5n3 (docosapentaenoic acid)</b>          | Lipid        | Mole % Total Fatty Acid                              | 0.08  | 0.23 | 0.92 |
| <b>2-aminooctanoate</b>                          | Lipid        | Fatty Acid, Amino                                    | 0.15  | 0.24 | 0.92 |
| <b>7-alpha-hydroxycholesterol</b>                | Lipid        | Sterol                                               | 0.21  | 0.24 | 0.92 |
| <b>thyroxine</b>                                 | Amino Acid   | Phenylalanine and Tyrosine Metabolism                | 0.32  | 0.24 | 0.92 |
| <b>gamma-glutamylvaline</b>                      | Peptide      | Gamma-glutamyl Amino Acid                            | 0.06  | 0.24 | 0.92 |
| <b>saccharin</b>                                 | Xenobiotics  | Food Component/Plant                                 | 0.70  | 0.24 | 0.92 |
| <b>glucose</b>                                   | Carbohydrate | Glycolysis, Gluconeogenesis, and Pyruvate Metabolism | 0.06  | 0.24 | 0.92 |
| <b>hypotaurine</b>                               | Amino Acid   | Methionine, Cysteine, SAM and Taurine Metabolism     | -0.24 | 0.25 | 0.93 |
| <b>10-undecenoate (11:1n1)</b>                   | Lipid        | Medium Chain Fatty Acid                              | -0.11 | 0.25 | 0.93 |
| <b>1-palmitoylglycerophosphate</b>               | Lipid        | Lysolipid                                            | 0.18  | 0.25 | 0.93 |
| <b>salicylic glucuronide*</b>                    | Xenobiotics  | Drug                                                 | 0.60  | 0.25 | 0.93 |
| <b>gamma-glutamylalanine</b>                     | Peptide      | Gamma-glutamyl Amino Acid                            | 0.11  | 0.25 | 0.93 |
| <b>cholesterol</b>                               | Lipid        | Sterol                                               | -0.07 | 0.25 | 0.93 |
| <b>taurothiocholate 3-sulfate</b>                | Lipid        | Secondary Bile Acid Metabolism                       | -0.38 | 0.25 | 0.93 |
| <b>alanine</b>                                   | Amino Acid   | Alanine and Aspartate Metabolism                     | 0.05  | 0.26 | 0.93 |
| <b>taurocholate sulfate</b>                      | Lipid        | Secondary Bile Acid Metabolism                       | -0.19 | 0.26 | 0.93 |
| <b>stearidonate (18:4n3)</b>                     | Lipid        | Polyunsaturated Fatty Acid (n3 and n6)               | 0.14  | 0.26 | 0.93 |
| <b>7-methylurate</b>                             | Xenobiotics  | Xanthine Metabolism                                  | -0.51 | 0.26 | 0.93 |
| <b>serine</b>                                    | Amino Acid   | Glycine, Serine and Threonine Metabolism             | -0.07 | 0.26 | 0.93 |
| <b>glutaryl carnitine (C5)</b>                   | Amino Acid   | Lysine Metabolism                                    | 0.08  | 0.26 | 0.93 |
| <b>1-dihomo-linolenylglycerol (alpha, gamma)</b> | Lipid        | Monoacylglycerol                                     | 0.11  | 0.27 | 0.93 |
| <b>lactate</b>                                   | Carbohydrate | Glycolysis, Gluconeogenesis, and Pyruvate Metabolism | 0.06  | 0.27 | 0.93 |
| <b>pseudouridine</b>                             | Nucleotide   | Pyrimidine Metabolism, Uracil containing             | 0.05  | 0.27 | 0.93 |
| <b>taurochenodeoxycholate</b>                    | Lipid        | Primary Bile Acid Metabolism                         | -0.33 | 0.27 | 0.93 |
| <b>N-acetyl-3-methylhistidine*</b>               | Amino Acid   | Histidine Metabolism                                 | 0.30  | 0.27 | 0.93 |
| <b>oleoyl sphingomyelin</b>                      | Lipid        | Sphingolipid Metabolism                              | 0.07  | 0.28 | 0.93 |

|                                                          |                        |                                                  |       |      |      |
|----------------------------------------------------------|------------------------|--------------------------------------------------|-------|------|------|
| <b>phenylacetate</b>                                     | Amino Acid             | Phenylalanine and Tyrosine Metabolism            | 0.17  | 0.28 | 0.93 |
| <b>delta-tocopherol</b>                                  | Cofactors and Vitamins | Tocopherol Metabolism                            | 0.25  | 0.28 | 0.93 |
| <b>1-arachidonoylglycerophosphate</b>                    | Lipid                  | Lysolipid                                        | 0.12  | 0.28 | 0.93 |
| <b>4-acetamidobutanoate</b>                              | Amino Acid             | Polyamine Metabolism                             | 0.08  | 0.28 | 0.93 |
| <b>theobromine</b>                                       | Xenobiotics            | Xanthine Metabolism                              | -0.33 | 0.28 | 0.93 |
| <b>indolepropionate</b>                                  | Amino Acid             | Tryptophan Metabolism                            | -0.20 | 0.29 | 0.93 |
| <b>butyrylcarnitine (C4)</b>                             | Lipid                  | Fatty Acid Metabolism (also BCAA Metabolism)     | 0.12  | 0.29 | 0.93 |
| <b>salicylate</b>                                        | Xenobiotics            | Drug                                             | 0.43  | 0.29 | 0.93 |
| <b>1,2-propanediol</b>                                   | Xenobiotics            | Chemical                                         | 0.23  | 0.29 | 0.93 |
| <b>N-acetyl-1-methylhistidine*</b>                       | Amino Acid             | Histidine Metabolism                             | 0.15  | 0.29 | 0.93 |
| <b>TL18:1n9 (oleic acid)</b>                             | Lipid                  | Mole % Total Fatty Acid                          | 0.04  | 0.29 | 0.93 |
| <b>1-eicosadienoyl-GPC* (20:2)*</b>                      | Lipid                  | Lysolipid                                        | 0.14  | 0.29 | 0.93 |
| <b>N3-methyluridine</b>                                  | Nucleotide             | Pyrimidine Metabolism, Uracil containing         | 0.14  | 0.29 | 0.93 |
| <b>N-oleoyltaurine</b>                                   | Lipid                  | Endocannabinoid                                  | 0.25  | 0.29 | 0.93 |
| <b>N-acetylcarnosine</b>                                 | Peptide                | Dipeptide Derivative                             | -0.08 | 0.29 | 0.93 |
| <b>pregnen-diol disulfate*</b>                           | Lipid                  | Steroid                                          | 0.16  | 0.30 | 0.93 |
| <b>methionine</b>                                        | Amino Acid             | Methionine, Cysteine, SAM and Taurine Metabolism | -0.05 | 0.30 | 0.93 |
| <b>2-ethylhexanoic acid</b>                              | Xenobiotics            | Chemical                                         | -0.09 | 0.30 | 0.93 |
| <b>gamma-CEHC glucuronide*</b>                           | Cofactors and Vitamins | Tocopherol Metabolism                            | 0.31  | 0.30 | 0.93 |
| <b>caprate (10:0)</b>                                    | Lipid                  | Medium Chain Fatty Acid                          | -0.10 | 0.30 | 0.93 |
| <b>1-myristoylglycerol (14:0)</b>                        | Lipid                  | Monoacylglycerol                                 | 0.15  | 0.30 | 0.93 |
| <b>gamma-glutamylisoleucine*</b>                         | Peptide                | Gamma-glutamyl Amino Acid                        | 0.07  | 0.31 | 0.93 |
| <b>3-hydroxypyridine sulfate</b>                         | Xenobiotics            | Chemical                                         | 0.29  | 0.31 | 0.93 |
| <b>2-piperidinone</b>                                    | Xenobiotics            | Food Component/Plant                             | 0.27  | 0.31 | 0.93 |
| <b>2-linoleoyl-GPC* (18:2)*</b>                          | Lipid                  | Lysolipid                                        | 0.10  | 0.31 | 0.93 |
| <b>12,13-DiHOME</b>                                      | Lipid                  | Fatty Acid, Dihydroxy                            | -0.14 | 0.32 | 0.93 |
| <b>4-methylcatechol sulfate</b>                          | Xenobiotics            | Benzoate Metabolism                              | -0.24 | 0.32 | 0.93 |
| <b>dopamine sulfate (2)</b>                              | Amino Acid             | Phenylalanine and Tyrosine Metabolism            | -0.11 | 0.32 | 0.93 |
| <b>palmitoyl-arachidonoyl-glycerophosphocholine (1)*</b> | Lipid                  | Lysolipid                                        | 0.11  | 0.32 | 0.93 |
| <b>N2-acetyllysine</b>                                   | Amino Acid             | Lysine Metabolism                                | 0.15  | 0.32 | 0.93 |
| <b>indolelactate</b>                                     | Amino Acid             | Tryptophan Metabolism                            | 0.07  | 0.32 | 0.93 |
| <b>arabonate</b>                                         | Cofactors and Vitamins | Ascorbate and Aldarate Metabolism                | 0.09  | 0.32 | 0.93 |
| <b>N-palmitoyl glycine</b>                               | Lipid                  | Fatty Acid Metabolism(Acyl Glycine)              | -0.12 | 0.32 | 0.93 |
| <b>6-oxopiperidine-2-carboxylic acid</b>                 | Xenobiotics            | Drug                                             | 0.08  | 0.33 | 0.93 |
| <b>arabitol</b>                                          | Carbohydrate           | Pentose Metabolism                               | 0.08  | 0.33 | 0.93 |

|                                                          |                        |                                             |       |      |      |
|----------------------------------------------------------|------------------------|---------------------------------------------|-------|------|------|
| <b>tryptophan betaine</b>                                | Amino Acid             | Tryptophan Metabolism                       | 0.25  | 0.33 | 0.93 |
| <b>2-hydroxyhippurate (salicylurate)</b>                 | Xenobiotics            | Benzoate Metabolism                         | 0.39  | 0.33 | 0.93 |
| <b>glycylphenylalanine</b>                               | Peptide                | Dipeptide                                   | -0.25 | 0.33 | 0.93 |
| <b>5alpha-pregnan-3beta,20alpha-diol monosulfate (2)</b> | Lipid                  | Steroid                                     | 0.34  | 0.33 | 0.93 |
| <b>myo-inositol</b>                                      | Lipid                  | Inositol Metabolism                         | 0.05  | 0.33 | 0.93 |
| <b>2-stearoylglycerophosphoinositol*</b>                 | Lipid                  | Lysolipid                                   | -0.16 | 0.34 | 0.93 |
| <b>glycylproline</b>                                     | Peptide                | Dipeptide                                   | -0.24 | 0.34 | 0.93 |
| <b>5-methylthioadenosine (MTA)</b>                       | Amino Acid             | Polyamine Metabolism                        | 0.29  | 0.34 | 0.93 |
| <b>adenosine 3',5'-cyclic monophosphate (cAMP)</b>       | Nucleotide             | Purine Metabolism, Adenine containing       | 0.21  | 0.34 | 0.93 |
| <b>palmitoleoyl sphingomyelin*</b>                       | Lipid                  | Sphingolipid Metabolism                     | 0.05  | 0.34 | 0.93 |
| <b>5alpha-pregnan-3beta,20alpha-diol disulfate</b>       | Lipid                  | Steroid                                     | 0.19  | 0.34 | 0.93 |
| <b>erythritol</b>                                        | Xenobiotics            | Food Component/Plant                        | 0.12  | 0.34 | 0.93 |
| <b>methysuccinate</b>                                    | Amino Acid             | Leucine, Isoleucine and Valine Metabolism   | -0.07 | 0.34 | 0.93 |
| <b>prolylhydroxyproline</b>                              | Amino Acid             | Urea cycle; Arginine and Proline Metabolism | 0.12  | 0.34 | 0.93 |
| <b>gamma-glutamyl-2-aminobutyrate</b>                    | Peptide                | Gamma-glutamyl Amino Acid                   | 0.17  | 0.34 | 0.93 |
| <b>p-cresol sulfate</b>                                  | Amino Acid             | Phenylalanine and Tyrosine Metabolism       | 0.26  | 0.35 | 0.93 |
| <b>TL22:6n3 (docosahexaenoic acid)</b>                   | Lipid                  | Mole % Total Fatty Acid                     | 0.09  | 0.35 | 0.93 |
| <b>hydroquinone sulfate</b>                              | Xenobiotics            | Drug                                        | -0.26 | 0.35 | 0.93 |
| <b>2,3-dihydroxyisovalerate</b>                          | Xenobiotics            | Food Component/Plant                        | 0.32  | 0.35 | 0.93 |
| <b>myristoleoylcarnitine*</b>                            | Lipid                  | Fatty Acid Metabolism(Acyl Carnitine)       | 0.14  | 0.35 | 0.93 |
| <b>pantothenate (Vitamin B5)</b>                         | Cofactors and Vitamins | Pantothenate and CoA Metabolism             | 0.11  | 0.35 | 0.93 |
| <b>dihomolinolenate (20:3n3 or 3n6)</b>                  | Lipid                  | Polyunsaturated Fatty Acid (n3 and n6)      | 0.05  | 0.35 | 0.93 |
| <b>dihomolinoleate (20:2n6)</b>                          | Lipid                  | Polyunsaturated Fatty Acid (n3 and n6)      | 0.09  | 0.35 | 0.93 |
| <b>5,6-dihydrouracil</b>                                 | Nucleotide             | Pyrimidine Metabolism, Uracil containing    | -0.07 | 0.36 | 0.93 |
| <b>1-linoleoyl-GPC (18:2)</b>                            | Lipid                  | Lysolipid                                   | 0.07  | 0.36 | 0.93 |
| <b>paraxanthine</b>                                      | Xenobiotics            | Xanthine Metabolism                         | -0.44 | 0.36 | 0.93 |
| <b>3-hydroxymyristate</b>                                | Lipid                  | Fatty Acid, Monohydroxy                     | 0.08  | 0.36 | 0.93 |
| <b>valylarginine</b>                                     | Peptide                | Dipeptide                                   | 0.23  | 0.36 | 0.93 |
| <b>coprostanol</b>                                       | Lipid                  | Sterol                                      | 0.28  | 0.36 | 0.93 |
| <b>imidazole lactate</b>                                 | Amino Acid             | Histidine Metabolism                        | 0.08  | 0.36 | 0.93 |
| <b>pregnenolone sulfate</b>                              | Lipid                  | Steroid                                     | 0.19  | 0.36 | 0.93 |
| <b>TL15:0 (pentadecanoic acid)</b>                       | Lipid                  | Mole % Total Fatty Acid                     | -0.04 | 0.37 | 0.93 |
| <b>alpha-hydroxyisocaproate</b>                          | Amino Acid             | Leucine, Isoleucine and Valine Metabolism   | -0.08 | 0.37 | 0.93 |

|                                           |                        |                                                  |       |      |      |
|-------------------------------------------|------------------------|--------------------------------------------------|-------|------|------|
| <b>docosadienoate (22:2n6)</b>            | Lipid                  | Polyunsaturated Fatty Acid (n3 and n6)           | 0.08  | 0.37 | 0.93 |
| <b>N-acetylneuramate</b>                  | Carbohydrate           | Aminosugar Metabolism                            | 0.10  | 0.37 | 0.93 |
| <b>N-acetyltaurine</b>                    | Amino Acid             | Methionine, Cysteine, SAM and Taurine Metabolism | 0.11  | 0.38 | 0.93 |
| <b>laurylcarnitine (C12)</b>              | Lipid                  | Fatty Acid Metabolism(Acyl Carnitine)            | 0.10  | 0.38 | 0.93 |
| <b>7-dehydro-cholesterol</b>              | Lipid                  | Sterol                                           | 0.31  | 0.38 | 0.93 |
| <b>2-aminobutyrate</b>                    | Amino Acid             | Methionine, Cysteine, SAM and Taurine Metabolism | -0.07 | 0.38 | 0.93 |
| <b>1-palmitoylglycerol (16:0)</b>         | Lipid                  | Monoacylglycerol                                 | 0.08  | 0.38 | 0.93 |
| <b>N-acetylaspartate (NAA)</b>            | Amino Acid             | Alanine and Aspartate Metabolism                 | -0.05 | 0.38 | 0.93 |
| <b>1-linoleoylglycerol (18:2)</b>         | Lipid                  | Monoacylglycerol                                 | 0.09  | 0.38 | 0.93 |
| <b>N-acetyl-aspartyl-glutamate (NAAG)</b> | Amino Acid             | Glutamate Metabolism                             | -0.06 | 0.38 | 0.93 |
| <b>5-oxoproline</b>                       | Amino Acid             | Glutathione Metabolism                           | -0.07 | 0.39 | 0.93 |
| <b>glycochenodeoxycholate</b>             | Lipid                  | Primary Bile Acid Metabolism                     | -0.21 | 0.39 | 0.93 |
| <b>glycocholenate sulfate*</b>            | Lipid                  | Secondary Bile Acid Metabolism                   | -0.09 | 0.39 | 0.93 |
| <b>hippurate</b>                          | Xenobiotics            | Benzoate Metabolism                              | -0.18 | 0.39 | 0.94 |
| <b>1-methylnicotinamide</b>               | Cofactors and Vitamins | Nicotinate and Nicotinamide Metabolism           | -0.23 | 0.39 | 0.94 |
| <b>N-6-trimethyllysine</b>                | Amino Acid             | Lysine Metabolism                                | -0.09 | 0.39 | 0.94 |
| <b>10-nonadecenoate (19:1n9)</b>          | Lipid                  | Long Chain Fatty Acid                            | 0.08  | 0.40 | 0.94 |
| <b>dihydroorotate</b>                     | Nucleotide             | Pyrimidine Metabolism, Orotate containing        | 0.20  | 0.40 | 0.94 |
| <b>tyrosine</b>                           | Amino Acid             | Phenylalanine and Tyrosine Metabolism            | -0.04 | 0.40 | 0.94 |
| <b>21-hydroxypregnenolone disulfate</b>   | Lipid                  | Steroid                                          | 0.14  | 0.40 | 0.94 |
| <b>glycoursodeoxycholate</b>              | Lipid                  | Secondary Bile Acid Metabolism                   | -0.29 | 0.40 | 0.94 |
| <b>4-hydroxychlorothalonil</b>            | Xenobiotics            | Chemical                                         | 0.11  | 0.41 | 0.95 |
| <b>oxalate (ethanedioate)</b>             | Cofactors and Vitamins | Ascorbate and Aldarate Metabolism                | -0.13 | 0.41 | 0.95 |
| <b>catechol sulfate</b>                   | Xenobiotics            | Benzoate Metabolism                              | -0.17 | 0.41 | 0.95 |
| <b>glycolate (hydroxyacetate)</b>         | Xenobiotics            | Chemical                                         | -0.05 | 0.41 | 0.95 |
| <b>2-methylmalonyl carnitine</b>          | Lipid                  | Fatty Acid Synthesis                             | -0.07 | 0.42 | 0.95 |
| <b>isovalerylcarnitine (C5)</b>           | Amino Acid             | Leucine, Isoleucine and Valine Metabolism        | -0.08 | 0.42 | 0.95 |
| <b>stigmasterol</b>                       | Lipid                  | Sterol                                           | -0.15 | 0.42 | 0.95 |
| <b>dopamine sulfate (1)</b>               | Amino Acid             | Phenylalanine and Tyrosine Metabolism            | -0.13 | 0.42 | 0.95 |
| <b>alpha-glutamyltyrosine</b>             | Peptide                | Dipeptide                                        | -0.26 | 0.42 | 0.95 |
| <b>arachidate (20:0)</b>                  | Lipid                  | Long Chain Fatty Acid                            | 0.05  | 0.43 | 0.95 |
| <b>beta-hydroxyisovalerate</b>            | Amino Acid             | Leucine, Isoleucine and Valine Metabolism        | 0.08  | 0.43 | 0.95 |
| <b>palmitoyl sphingomyelin</b>            | Lipid                  | Sphingolipid Metabolism                          | 0.03  | 0.43 | 0.95 |

|                                                    |                        |                                                      |       |      |      |
|----------------------------------------------------|------------------------|------------------------------------------------------|-------|------|------|
| <b>asparagine</b>                                  | Amino Acid             | Alanine and Aspartate Metabolism                     | -0.03 | 0.43 | 0.95 |
| <b>piperine</b>                                    | Xenobiotics            | Food Component/Plant                                 | 0.17  | 0.43 | 0.95 |
| <b>oleoyl-linoleoyl-glycerophosphocholine (1)*</b> | Lipid                  | Lysolipid                                            | 0.04  | 0.43 | 0.95 |
| <b>cholestanol</b>                                 | Lipid                  | Sterol                                               | -0.07 | 0.43 | 0.95 |
| <b>alpha-tocopherol</b>                            | Cofactors and Vitamins | Tocopherol Metabolism                                | 0.08  | 0.43 | 0.95 |
| <b>cyclohexanebutanoic acid</b>                    | Xenobiotics            | Chemical                                             | -0.09 | 0.43 | 0.95 |
| <b>inosine</b>                                     | Nucleotide             | Purine Metabolism, (Hypo)Xanthine/Inosine containing | -0.23 | 0.43 | 0.95 |
| <b>eicosanodioate</b>                              | Lipid                  | Fatty Acid, Dicarboxylate                            | -0.10 | 0.44 | 0.95 |
| <b>3beta,7alpha-dihydroxy-5-cholestenoate</b>      | Lipid                  | Secondary Bile Acid Metabolism                       | 0.24  | 0.44 | 0.95 |
| <b>xanthine</b>                                    | Nucleotide             | Purine Metabolism, (Hypo)Xanthine/Inosine containing | 0.08  | 0.44 | 0.95 |
| <b>eicosenoate (20:1n9 or 1n11)</b>                | Lipid                  | Long Chain Fatty Acid                                | 0.07  | 0.44 | 0.95 |
| <b>isobutyrylglycine (C4)</b>                      | Amino Acid             | Leucine, Isoleucine and Valine Metabolism            | 0.09  | 0.44 | 0.95 |
| <b>2-hydroxyoctanoate</b>                          | Lipid                  | Fatty Acid, Monohydroxy                              | 0.08  | 0.44 | 0.95 |
| <b>proline</b>                                     | Amino Acid             | Urea cycle; Arginine and Proline Metabolism          | 0.04  | 0.44 | 0.95 |
| <b>ribonate (ribonolactone)</b>                    | Carbohydrate           | Pentose Metabolism                                   | -0.07 | 0.45 | 0.95 |
| <b>3-methyl-2-oxobutyrate</b>                      | Amino Acid             | Leucine, Isoleucine and Valine Metabolism            | 0.04  | 0.45 | 0.95 |
| <b>ectoine</b>                                     | Xenobiotics            | Chemical                                             | 0.20  | 0.45 | 0.95 |
| <b>linoleoylcarnitine*</b>                         | Lipid                  | Fatty Acid Metabolism(Acyl Carnitine)                | 0.10  | 0.45 | 0.95 |
| <b>pyruvate</b>                                    | Carbohydrate           | Glycolysis, Gluconeogenesis, and Pyruvate Metabolism | 0.11  | 0.46 | 0.95 |
| <b>hydantoin-5-propionic acid</b>                  | Amino Acid             | Histidine Metabolism                                 | 0.17  | 0.46 | 0.95 |
| <b>cysteine-glutathione disulfide</b>              | Amino Acid             | Glutathione Metabolism                               | -0.20 | 0.46 | 0.95 |
| <b>3-hydroxybutyrate (BHBA)</b>                    | Lipid                  | Ketone Bodies                                        | -0.14 | 0.46 | 0.95 |
| <b>histidylphenylalanine</b>                       | Peptide                | Dipeptide                                            | 0.21  | 0.47 | 0.95 |
| <b>allantoin</b>                                   | Nucleotide             | Purine Metabolism, (Hypo)Xanthine/Inosine containing | -0.11 | 0.47 | 0.95 |
| <b>1,3,7-trimethylurate</b>                        | Xenobiotics            | Xanthine Metabolism                                  | -0.24 | 0.47 | 0.95 |
| <b>mannitol</b>                                    | Carbohydrate           | Fructose, Mannose and Galactose Metabolism           | 0.22  | 0.47 | 0.95 |
| <b>alpha-ketobutyrate</b>                          | Amino Acid             | Methionine, Cysteine, SAM and Taurine Metabolism     | 0.14  | 0.47 | 0.95 |
| <b>squalene</b>                                    | Lipid                  | Sterol                                               | 0.20  | 0.47 | 0.95 |
| <b>3-(4-hydroxyphenyl)propionate</b>               | Amino Acid             | Phenylalanine and Tyrosine Metabolism                | -0.27 | 0.47 | 0.95 |
| <b>pyridoxine (Vitamin B6)</b>                     | Cofactors and Vitamins | Vitamin B6 Metabolism                                | -0.06 | 0.47 | 0.95 |



|                                                         |                        |                                                      |       |      |      |
|---------------------------------------------------------|------------------------|------------------------------------------------------|-------|------|------|
| <b>TL16:1n7 (palmitoleic acid)</b>                      | Lipid                  | Mole % Total Fatty Acid                              | 0.07  | 0.47 | 0.95 |
| <b>ornithine</b>                                        | Amino Acid             | Urea cycle; Arginine and Proline Metabolism          | -0.06 | 0.47 | 0.95 |
| <b>pelargonate (9:0)</b>                                | Lipid                  | Medium Chain Fatty Acid                              | -0.04 | 0.47 | 0.95 |
| <b>beta-tocopherol</b>                                  | Cofactors and Vitamins | Tocopherol Metabolism                                | -0.15 | 0.48 | 0.95 |
| <b>taurine</b>                                          | Amino Acid             | Methionine, Cysteine, SAM and Taurine Metabolism     | -0.07 | 0.48 | 0.95 |
| <b>aspartate</b>                                        | Amino Acid             | Alanine and Aspartate Metabolism                     | 0.07  | 0.48 | 0.95 |
| <b>TL20:1n9 (eicosaenoic acid)</b>                      | Lipid                  | Mole % Total Fatty Acid                              | -0.03 | 0.48 | 0.95 |
| <b>1-methylhistidine</b>                                | Amino Acid             | Histidine Metabolism                                 | 0.07  | 0.48 | 0.95 |
| <b>taurocholate</b>                                     | Lipid                  | Primary Bile Acid Metabolism                         | -0.25 | 0.48 | 0.95 |
| <b>5alpha-androstan-3beta,17beta-diol disulfate</b>     | Lipid                  | Steroid                                              | -0.18 | 0.48 | 0.95 |
| <b>N-formylmethionine</b>                               | Amino Acid             | Methionine, Cysteine, SAM and Taurine Metabolism     | 0.03  | 0.49 | 0.95 |
| <b>4-androsten-3beta,17beta-diol disulfate (1)</b>      | Lipid                  | Steroid                                              | 0.15  | 0.49 | 0.95 |
| <b>tryptophylglutamate</b>                              | Peptide                | Dipeptide                                            | -0.27 | 0.49 | 0.95 |
| <b>4-allylphenol sulfate</b>                            | Xenobiotics            | Food Component/Plant                                 | 0.17  | 0.49 | 0.96 |
| <b>chenodeoxycholate</b>                                | Lipid                  | Primary Bile Acid Metabolism                         | -0.17 | 0.49 | 0.96 |
| <b>arginine</b>                                         | Amino Acid             | Urea cycle; Arginine and Proline Metabolism          | -0.05 | 0.50 | 0.96 |
| <b>palmitate (16:0)</b>                                 | Lipid                  | Long Chain Fatty Acid                                | 0.03  | 0.50 | 0.96 |
| <b>ADSGEGDFAEGGGVR*</b>                                 | Peptide                | Fibrinogen Cleavage Peptide                          | -0.06 | 0.50 | 0.96 |
| <b>phenol sulfate</b>                                   | Amino Acid             | Phenylalanine and Tyrosine Metabolism                | 0.18  | 0.50 | 0.96 |
| <b>1,5-anhydroglucitol (1,5-AG)</b>                     | Carbohydrate           | Glycolysis, Gluconeogenesis, and Pyruvate Metabolism | -0.09 | 0.50 | 0.97 |
| <b>O-sulfo-L-tyrosine</b>                               | Xenobiotics            | Chemical                                             | 0.05  | 0.51 | 0.97 |
| <b>valine</b>                                           | Amino Acid             | Leucine, Isoleucine and Valine Metabolism            | -0.03 | 0.51 | 0.97 |
| <b>gamma-glutamylleucine</b>                            | Peptide                | Gamma-glutamyl Amino Acid                            | 0.04  | 0.51 | 0.97 |
| <b>N-acetylphenylalanine</b>                            | Amino Acid             | Phenylalanine and Tyrosine Metabolism                | 0.07  | 0.51 | 0.97 |
| <b>seryltyrosine</b>                                    | Peptide                | Dipeptide                                            | 0.15  | 0.51 | 0.97 |
| <b>serylalanine</b>                                     | Peptide                | Dipeptide                                            | 0.10  | 0.51 | 0.97 |
| <b>glycylglycine</b>                                    | Peptide                | Dipeptide                                            | -0.28 | 0.52 | 0.97 |
| <b>N-acetylglutamate</b>                                | Amino Acid             | Glutamate Metabolism                                 | 0.16  | 0.52 | 0.97 |
| <b>5alpha-pregnan-3beta,20beta-diol monosulfate (1)</b> | Lipid                  | Steroid                                              | -0.15 | 0.52 | 0.97 |
| <b>TLdm18:1n9 (plasmalogen oleic acid)</b>              | Lipid                  | Mole % Total Fatty Acid                              | 0.06  | 0.52 | 0.97 |
| <b>indolebutyrate</b>                                   | Amino Acid             | Tryptophan Metabolism                                | 0.13  | 0.52 | 0.97 |
| <b>3-hydroxyoctanoate</b>                               | Lipid                  | Fatty Acid, Monohydroxy                              | -0.07 | 0.52 | 0.97 |

|                                                             |                        |                                                  |       |      |      |
|-------------------------------------------------------------|------------------------|--------------------------------------------------|-------|------|------|
| <b>4-hydroxyphenylpyruvate</b>                              | Amino Acid             | Phenylalanine and Tyrosine Metabolism            | 0.08  | 0.53 | 0.97 |
| <b>5-hydroxyindoleacetate</b>                               | Amino Acid             | Tryptophan Metabolism                            | 0.06  | 0.53 | 0.97 |
| <b>urea</b>                                                 | Amino Acid             | Urea cycle; Arginine and Proline Metabolism      | 0.05  | 0.53 | 0.97 |
| <b>homovanillate (HVA)</b>                                  | Amino Acid             | Phenylalanine and Tyrosine Metabolism            | -0.07 | 0.53 | 0.97 |
| <b>3-methylhistidine</b>                                    | Amino Acid             | Histidine Metabolism                             | 0.15  | 0.53 | 0.97 |
| <b>threonate</b>                                            | Cofactors and Vitamins | Ascorbate and Aldarate Metabolism                | -0.10 | 0.53 | 0.97 |
| <b>N-acetyl glycine</b>                                     | Amino Acid             | Glycine, Serine and Threonine Metabolism         | 0.08  | 0.53 | 0.97 |
| <b>citrulline</b>                                           | Amino Acid             | Urea cycle; Arginine and Proline Metabolism      | -0.06 | 0.54 | 0.97 |
| <b>fructose</b>                                             | Carbohydrate           | Fructose, Mannose and Galactose Metabolism       | -0.05 | 0.54 | 0.97 |
| <b>caffeine</b>                                             | Xenobiotics            | Xanthine Metabolism                              | -0.27 | 0.54 | 0.97 |
| <b>theophylline</b>                                         | Xenobiotics            | Xanthine Metabolism                              | -0.24 | 0.54 | 0.97 |
| <b>beta-hydroxyisovalerylcarnitine</b>                      | Amino Acid             | Leucine, Isoleucine and Valine Metabolism        | -0.05 | 0.54 | 0.97 |
| <b>hexanoylcarnitine (C6)</b>                               | Lipid                  | Fatty Acid Metabolism(Acyl Carnitine)            | -0.05 | 0.54 | 0.97 |
| <b>1-arachidonoyl-GPI* (20:4)*</b>                          | Lipid                  | Lysolipid                                        | 0.04  | 0.54 | 0.97 |
| <b>indoleacetate</b>                                        | Amino Acid             | Tryptophan Metabolism                            | 0.07  | 0.55 | 0.97 |
| <b>2-aminoheptanoate</b>                                    | Lipid                  | Fatty Acid, Amino                                | 0.06  | 0.55 | 0.97 |
| <b>sorbitol</b>                                             | Carbohydrate           | Fructose, Mannose and Galactose Metabolism       | 0.10  | 0.55 | 0.97 |
| <b>4-androsten-3beta,17beta-diol monosulfate (1)</b>        | Lipid                  | Steroid                                          | 0.12  | 0.55 | 0.97 |
| <b>N-acetylalanine</b>                                      | Amino Acid             | Alanine and Aspartate Metabolism                 | 0.02  | 0.55 | 0.97 |
| <b>palmitoyl-oleoyl-glycerophosphoglycerol (2)*</b>         | Lipid                  | Lysolipid                                        | 0.19  | 0.56 | 0.97 |
| <b>N-acetyltyrosine</b>                                     | Amino Acid             | Phenylalanine and Tyrosine Metabolism            | 0.06  | 0.56 | 0.97 |
| <b>1-eicosatrienoylglycerophosphoethanolamine*</b>          | Lipid                  | Lysolipid                                        | 0.14  | 0.56 | 0.97 |
| <b>adenine</b>                                              | Nucleotide             | Purine Metabolism, Adenine containing            | 0.07  | 0.56 | 0.98 |
| <b>3-carboxy-4-methyl-5-propyl-2-furanpropanoate (CMPF)</b> | Lipid                  | Fatty Acid, Dicarboxylate                        | 0.21  | 0.56 | 0.98 |
| <b>glycine</b>                                              | Amino Acid             | Glycine, Serine and Threonine Metabolism         | -0.04 | 0.57 | 0.98 |
| <b>1,7-dimethylurate</b>                                    | Xenobiotics            | Xanthine Metabolism                              | -0.22 | 0.57 | 0.98 |
| <b>galactonate</b>                                          | Carbohydrate           | Fructose, Mannose and Galactose Metabolism       | 0.25  | 0.57 | 0.98 |
| <b>homostachydrine*</b>                                     | Xenobiotics            | Food Component/Plant                             | 0.07  | 0.57 | 0.98 |
| <b>1-methylxanthine</b>                                     | Xenobiotics            | Xanthine Metabolism                              | 0.18  | 0.57 | 0.98 |
| <b>methionine sulfoxide</b>                                 | Amino Acid             | Methionine, Cysteine, SAM and Taurine Metabolism | -0.05 | 0.57 | 0.98 |
| <b>2-hydroxydecanoate</b>                                   | Lipid                  | Fatty Acid, Monohydroxy                          | 0.07  | 0.58 | 0.98 |

|                                                           |                        |                                           |       |      |      |
|-----------------------------------------------------------|------------------------|-------------------------------------------|-------|------|------|
| <b>quinolinate</b>                                        | Cofactors and Vitamins | Nicotinate and Nicotinamide Metabolism    | 0.09  | 0.58 | 0.98 |
| <b>isoleucine</b>                                         | Amino Acid             | Leucine, Isoleucine and Valine Metabolism | -0.02 | 0.58 | 0.98 |
| <b>3-hydroxyisobutyrate</b>                               | Amino Acid             | Leucine, Isoleucine and Valine Metabolism | 0.05  | 0.58 | 0.98 |
| <b>threonine</b>                                          | Amino Acid             | Glycine, Serine and Threonine Metabolism  | -0.03 | 0.59 | 0.98 |
| <b>malate</b>                                             | Energy                 | TCA Cycle                                 | -0.04 | 0.59 | 0.98 |
| <b>isoleucylglycine</b>                                   | Peptide                | Dipeptide                                 | -0.12 | 0.59 | 0.98 |
| <b>N-(2-furoyl)glycine</b>                                | Xenobiotics            | Food Component/Plant                      | 0.10  | 0.59 | 0.98 |
| <b>lathosterol</b>                                        | Lipid                  | Sterol                                    | -0.09 | 0.59 | 0.98 |
| <b>phenylalanine</b>                                      | Amino Acid             | Phenylalanine and Tyrosine Metabolism     | -0.02 | 0.59 | 0.98 |
| <b>andro steroid monosulfate (1)*</b>                     | Lipid                  | Steroid                                   | 0.14  | 0.59 | 0.98 |
| <b>stearoyl-arachidonoyl-glycerophosphoinositol (1)*</b>  | Lipid                  | Lysolipid                                 | 0.04  | 0.59 | 0.98 |
| <b>1-oleoyl-GPI (18:1)*</b>                               | Lipid                  | Lysolipid                                 | 0.07  | 0.59 | 0.98 |
| <b>stearoyl-linoleoyl-glycerophosphoethanolamine (1)*</b> | Lipid                  | Lysolipid                                 | -0.07 | 0.60 | 0.99 |
| <b>gamma-glutamyltryptophan</b>                           | Peptide                | Gamma-glutamyl Amino Acid                 | 0.04  | 0.60 | 0.99 |
| <b>1-oleoylglycerol (18:1)</b>                            | Lipid                  | Monoacylglycerol                          | 0.06  | 0.61 | 0.99 |
| <b>13-HODE + 9-HODE</b>                                   | Lipid                  | Fatty Acid, Monohydroxy                   | -0.07 | 0.61 | 0.99 |
| <b>guanosine</b>                                          | Nucleotide             | Purine Metabolism, Guanine containing     | -0.17 | 0.61 | 0.99 |
| <b>3-(4-hydroxyphenyl)lactate (HPLA)</b>                  | Amino Acid             | Phenylalanine and Tyrosine Metabolism     | 0.03  | 0.61 | 0.99 |
| <b>3-hydroxylaurate</b>                                   | Lipid                  | Fatty Acid, Monohydroxy                   | 0.05  | 0.61 | 0.99 |
| <b>phenylalanyltryptophan</b>                             | Peptide                | Dipeptide                                 | 0.08  | 0.62 | 0.99 |
| <b>TL22:1n9 (erucic acid)</b>                             | Lipid                  | Mole % Total Fatty Acid                   | -0.10 | 0.62 | 0.99 |
| <b>5-methyluridine (ribothymidine)</b>                    | Nucleotide             | Pyrimidine Metabolism, Uracil containing  | -0.03 | 0.62 | 0.99 |
| <b>4-androsten-3beta,17beta-diol disulfate (2)</b>        | Lipid                  | Steroid                                   | 0.07  | 0.63 | 0.99 |
| <b>acisoga</b>                                            | Amino Acid             | Polyamine Metabolism                      | 0.04  | 0.63 | 0.99 |
| <b>TL14:0 (myristic acid)</b>                             | Lipid                  | Mole % Total Fatty Acid                   | 0.05  | 0.63 | 0.99 |
| <b>gamma-tocopherol</b>                                   | Cofactors and Vitamins | Tocopherol Metabolism                     | 0.07  | 0.63 | 0.99 |
| <b>4-guanidinobutanoate</b>                               | Amino Acid             | Guanidino and Acetamido Metabolism        | 0.15  | 0.63 | 0.99 |
| <b>3-phenylpropionate (hydrocinnamate)</b>                | Amino Acid             | Phenylalanine and Tyrosine Metabolism     | 0.13  | 0.63 | 0.99 |
| <b>N-acetylserine</b>                                     | Amino Acid             | Glycine, Serine and Threonine Metabolism  | 0.02  | 0.63 | 0.99 |
| <b>pregn steroid monosulfate*</b>                         | Lipid                  | Steroid                                   | 0.07  | 0.64 | 0.99 |
| <b>TLdm18:1n7 (plasmalogen vaccenic acid)</b>             | Lipid                  | Mole % Total Fatty Acid                   | -0.10 | 0.64 | 0.99 |
| <b>isovalerylglycine</b>                                  | Amino Acid             | Leucine, Isoleucine and Valine Metabolism | 0.06  | 0.64 | 0.99 |

|                                                         |                        |                                             |       |      |      |
|---------------------------------------------------------|------------------------|---------------------------------------------|-------|------|------|
| <b>O-methylcatechol sulfate</b>                         | Xenobiotics            | Benzoate Metabolism                         | -0.10 | 0.64 | 0.99 |
| <b>TL22:5n6 (osbond acid)</b>                           | Lipid                  | Mole % Total Fatty Acid                     | 0.04  | 0.64 | 0.99 |
| <b>serotonin (5HT)</b>                                  | Amino Acid             | Tryptophan Metabolism                       | 0.12  | 0.64 | 0.99 |
| <b>beta-alanine</b>                                     | Nucleotide             | Pyrimidine Metabolism, Uracil containing    | -0.05 | 0.64 | 0.99 |
| <b>homocitrulline</b>                                   | Amino Acid             | Urea cycle; Arginine and Proline Metabolism | 0.06  | 0.65 | 0.99 |
| <b>quinat</b>                                           | Xenobiotics            | Food Component/Plant                        | 0.22  | 0.65 | 0.99 |
| <b>dimethylglycine</b>                                  | Amino Acid             | Glycine, Serine and Threonine Metabolism    | 0.04  | 0.65 | 0.99 |
| <b>gamma-CEHC</b>                                       | Cofactors and Vitamins | Tocopherol Metabolism                       | 0.06  | 0.65 | 0.99 |
| <b>creatine</b>                                         | Amino Acid             | Creatine Metabolism                         | 0.05  | 0.65 | 0.99 |
| <b>palmitoyl ethanolamide</b>                           | Lipid                  | Endocannabinoid                             | 0.03  | 0.65 | 0.99 |
| <b>gentisate</b>                                        | Amino Acid             | Phenylalanine and Tyrosine Metabolism       | 0.19  | 0.65 | 0.99 |
| <b>7-methylguanine</b>                                  | Nucleotide             | Purine Metabolism, Guanine containing       | -0.02 | 0.65 | 0.99 |
| <b>stearoyl-linoleoyl-glycerophosphocholine (2)*</b>    | Lipid                  | Lysolipid                                   | -0.03 | 0.66 | 0.99 |
| <b>2-linoleoyl-GPE* (18:2)*</b>                         | Lipid                  | Lysolipid                                   | 0.05  | 0.66 | 0.99 |
| <b>N2,N5-diacetylornithine</b>                          | Amino Acid             | Urea cycle; Arginine and Proline Metabolism | 0.09  | 0.66 | 0.99 |
| <b>cholate</b>                                          | Lipid                  | Primary Bile Acid Metabolism                | -0.17 | 0.66 | 0.99 |
| <b>N-acetylvaline</b>                                   | Amino Acid             | Leucine, Isoleucine and Valine Metabolism   | -0.02 | 0.66 | 0.99 |
| <b>octanoylcarnitine (C8)</b>                           | Lipid                  | Fatty Acid Metabolism(Acyl Carnitine)       | -0.04 | 0.66 | 0.99 |
| <b>isobutyrylcarnitine (C4)</b>                         | Amino Acid             | Leucine, Isoleucine and Valine Metabolism   | -0.05 | 0.66 | 0.99 |
| <b>lysine</b>                                           | Amino Acid             | Lysine Metabolism                           | 0.02  | 0.66 | 0.99 |
| <b>trans-urocanate</b>                                  | Amino Acid             | Histidine Metabolism                        | -0.05 | 0.67 | 0.99 |
| <b>tiglyl carnitine (C5)</b>                            | Amino Acid             | Leucine, Isoleucine and Valine Metabolism   | 0.04  | 0.67 | 0.99 |
| <b>phenylcarnitine*</b>                                 | Xenobiotics            | Chemical                                    | -0.13 | 0.67 | 0.99 |
| <b>uridine</b>                                          | Nucleotide             | Pyrimidine Metabolism, Uracil containing    | 0.02  | 0.68 | 0.99 |
| <b>4-androsten-3alpha,17alpha-diol monosulfate (2)</b>  | Lipid                  | Steroid                                     | 0.10  | 0.68 | 0.99 |
| <b>gamma-glutamylphenylalanine</b>                      | Peptide                | Gamma-glutamyl Amino Acid                   | 0.02  | 0.68 | 0.99 |
| <b>stearoyl-arachidonoyl-glycerophosphocholine (1)*</b> | Lipid                  | Lysolipid                                   | -0.08 | 0.68 | 0.99 |
| <b>xylose</b>                                           | Carbohydrate           | Pentose Metabolism                          | 0.08  | 0.69 | 0.99 |
| <b>gamma-glutamylglutamate</b>                          | Peptide                | Gamma-glutamyl Amino Acid                   | 0.06  | 0.69 | 0.99 |
| <b>TL18:1n7 (avaccenic acid)</b>                        | Lipid                  | Mole % Total Fatty Acid                     | 0.02  | 0.69 | 0.99 |
| <b>myristate (14:0)</b>                                 | Lipid                  | Long Chain Fatty Acid                       | 0.03  | 0.69 | 0.99 |
| <b>tartronate (hydroxymalonate)</b>                     | Xenobiotics            | Bacterial/Fungal                            | -0.06 | 0.69 | 0.99 |

|                                                |                        |                                                  |       |      |      |
|------------------------------------------------|------------------------|--------------------------------------------------|-------|------|------|
| <b>1-methylimidazoleacetate</b>                | Amino Acid             | Histidine Metabolism                             | 0.07  | 0.70 | 0.99 |
| <b>bilirubin (E,E)*</b>                        | Cofactors and Vitamins | Hemoglobin and Porphyrin Metabolism              | 0.07  | 0.70 | 0.99 |
| <b>prolylglycine</b>                           | Peptide                | Dipeptide                                        | -0.07 | 0.70 | 0.99 |
| <b>glycocholate</b>                            | Lipid                  | Primary Bile Acid Metabolism                     | -0.10 | 0.70 | 0.99 |
| <b>gamma-glutamylthreonine*</b>                | Peptide                | Gamma-glutamyl Amino Acid                        | 0.03  | 0.70 | 0.99 |
| <b>gamma-glutamylglutamine</b>                 | Peptide                | Gamma-glutamyl Amino Acid                        | -0.03 | 0.70 | 0.99 |
| <b>N-acetylleucine</b>                         | Amino Acid             | Leucine, Isoleucine and Valine Metabolism        | -0.03 | 0.70 | 0.99 |
| <b>TL22:4n6 (adrenic acid)</b>                 | Lipid                  | Mole % Total Fatty Acid                          | 0.03  | 0.70 | 0.99 |
| <b>arabinose</b>                               | Carbohydrate           | Pentose Metabolism                               | 0.08  | 0.70 | 0.99 |
| <b>S-adenosylhomocysteine (SAH)</b>            | Amino Acid             | Methionine, Cysteine, SAM and Taurine Metabolism | 0.05  | 0.71 | 0.99 |
| <b>androsterone sulfate</b>                    | Lipid                  | Steroid                                          | -0.09 | 0.71 | 0.99 |
| <b>docosatrienoate (22:3n3)</b>                | Lipid                  | Polyunsaturated Fatty Acid (n3 and n6)           | 0.04  | 0.71 | 0.99 |
| <b>nicotinamide</b>                            | Cofactors and Vitamins | Nicotinate and Nicotinamide Metabolism           | -0.05 | 0.71 | 0.99 |
| <b>trimethylamine N-oxide</b>                  | Lipid                  | Phospholipid Metabolism                          | 0.16  | 0.71 | 0.99 |
| <b>dehydroisoandrosterone sulfate (DHEA-S)</b> | Lipid                  | Steroid                                          | 0.07  | 0.72 | 0.99 |
| <b>1,6-anhydroglucose</b>                      | Xenobiotics            | Food Component/Plant                             | -0.08 | 0.72 | 0.99 |
| <b>acetoacetate</b>                            | Lipid                  | Ketone Bodies                                    | -0.05 | 0.72 | 0.99 |
| <b>alpha-hydroxycaproate</b>                   | Lipid                  | Fatty Acid, Monohydroxy                          | 0.03  | 0.72 | 0.99 |
| <b>oleic ethanolamide</b>                      | Lipid                  | Endocannabinoid                                  | 0.03  | 0.72 | 0.99 |
| <b>DSGEGDFXAEGGGVR*</b>                        | Peptide                | Fibrinogen Cleavage Peptide                      | -0.09 | 0.72 | 0.99 |
| <b>4-methyl-2-oxopentanoate</b>                | Amino Acid             | Leucine, Isoleucine and Valine Metabolism        | 0.02  | 0.72 | 0.99 |
| <b>pregnanediol-3-glucuronide</b>              | Lipid                  | Steroid                                          | 0.11  | 0.73 | 0.99 |
| <b>3beta,7beta-dihydroxy-5-cholestenoate</b>   | Lipid                  | Sterol                                           | -0.03 | 0.73 | 0.99 |
| <b>1-methylguanosine</b>                       | Nucleotide             | Purine Metabolism, Guanine containing            | -0.02 | 0.73 | 0.99 |
| <b>N-acetylcitrulline</b>                      | Amino Acid             | Urea cycle; Arginine and Proline Metabolism      | 0.09  | 0.73 | 0.99 |
| <b>1-palmitoleoyl-GPI* (16:1)*</b>             | Lipid                  | Lysolipid                                        | 0.14  | 0.73 | 0.99 |
| <b>valerylcarnitine (C5)</b>                   | Lipid                  | Fatty Acid Metabolism(Acyl Carnitine)            | 0.13  | 0.74 | 0.99 |
| <b>10-heptadecenoate (17:1n7)</b>              | Lipid                  | Long Chain Fatty Acid                            | 0.04  | 0.74 | 0.99 |
| <b>4-vinylphenol sulfate</b>                   | Xenobiotics            | Benzoate Metabolism                              | 0.10  | 0.74 | 0.99 |
| <b>2-methylbutyrylcarnitine (C5)</b>           | Amino Acid             | Leucine, Isoleucine and Valine Metabolism        | 0.03  | 0.74 | 0.99 |
| <b>TL14:1n5 (myristoleic acid)</b>             | Lipid                  | Mole % Total Fatty Acid                          | 0.05  | 0.74 | 0.99 |
| <b>3,7-dimethylurate</b>                       | Xenobiotics            | Xanthine Metabolism                              | -0.10 | 0.74 | 0.99 |
| <b>nonadecanoate (19:0)</b>                    | Lipid                  | Long Chain Fatty Acid                            | 0.02  | 0.74 | 0.99 |

|                                                      |                        |                                                      |       |      |      |
|------------------------------------------------------|------------------------|------------------------------------------------------|-------|------|------|
| <b>cyclo(leu-pro)</b>                                | Peptide                | Dipeptide                                            | 0.06  | 0.75 | 0.99 |
| <b>hexanoylglycine (C6)</b>                          | Lipid                  | Fatty Acid Metabolism(Acyl Glycine)                  | 0.10  | 0.75 | 0.99 |
| <b>3-methylglutaryl carnitine (1)</b>                | Amino Acid             | Lysine Metabolism                                    | 0.05  | 0.75 | 0.99 |
| <b>stachydrine</b>                                   | Xenobiotics            | Food Component/Plant                                 | 0.09  | 0.75 | 0.99 |
| <b>cortisol</b>                                      | Lipid                  | Steroid                                              | -0.04 | 0.75 | 0.99 |
| <b>N-acetylarginine</b>                              | Amino Acid             | Urea cycle; Arginine and Proline Metabolism          | 0.04  | 0.75 | 0.99 |
| <b>tryptophan</b>                                    | Amino Acid             | Tryptophan Metabolism                                | -0.01 | 0.76 | 0.99 |
| <b>2-hydroxystearate</b>                             | Lipid                  | Fatty Acid, Monohydroxy                              | 0.02  | 0.76 | 0.99 |
| <b>N-acetylisoleucine</b>                            | Amino Acid             | Leucine, Isoleucine and Valine Metabolism            | -0.04 | 0.76 | 0.99 |
| <b>N2,N2-dimethylguanosine</b>                       | Nucleotide             | Purine Metabolism, Guanine containing                | 0.02  | 0.76 | 0.99 |
| <b>gamma-glutamylmethionine</b>                      | Peptide                | Gamma-glutamyl Amino Acid                            | 0.03  | 0.77 | 0.99 |
| <b>methylpalmitate (15 or 2)</b>                     | Lipid                  | Fatty Acid, Branched                                 | 0.02  | 0.77 | 0.99 |
| <b>succinate</b>                                     | Energy                 | TCA Cycle                                            | 0.01  | 0.77 | 0.99 |
| <b>4-ureidobutyrate</b>                              | Nucleotide             | Pyrimidine Metabolism, Uracil containing             | 0.04  | 0.77 | 0.99 |
| <b>phenylalanylphenylalanine</b>                     | Peptide                | Dipeptide                                            | -0.04 | 0.77 | 0.99 |
| <b>levulinate (4-oxovalerate)</b>                    | Xenobiotics            | Food Component/Plant                                 | 0.03  | 0.77 | 0.99 |
| <b>leucine</b>                                       | Amino Acid             | Leucine, Isoleucine and Valine Metabolism            | -0.01 | 0.77 | 0.99 |
| <b>3-hydroxyhippurate</b>                            | Xenobiotics            | Benzoate Metabolism                                  | -0.10 | 0.78 | 0.99 |
| <b>2-linolenoylglycerophosphocholine(18:3n3)*</b>    | Lipid                  | Lysolipid                                            | -0.09 | 0.78 | 0.99 |
| <b>cis-4-decenoyl carnitine</b>                      | Lipid                  | Fatty Acid Metabolism(Acyl Carnitine)                | -0.03 | 0.78 | 0.99 |
| <b>homoarginine</b>                                  | Amino Acid             | Urea cycle; Arginine and Proline Metabolism          | -0.08 | 0.78 | 0.99 |
| <b>1-pentadecanoylglycerol (1-monopentadecanoin)</b> | Lipid                  | Monoacylglycerol                                     | -0.03 | 0.78 | 0.99 |
| <b>pyridoxal</b>                                     | Cofactors and Vitamins | Vitamin B6 Metabolism                                | -0.10 | 0.79 | 0.99 |
| <b>maleate (cis-Butenedioate)</b>                    | Lipid                  | Fatty Acid, Dicarboxylate                            | 0.04  | 0.79 | 0.99 |
| <b>p-cresol-glucuronide*</b>                         | Amino Acid             | Phenylalanine and Tyrosine Metabolism                | 0.12  | 0.79 | 0.99 |
| <b>urate</b>                                         | Nucleotide             | Purine Metabolism, (Hypo)Xanthine/Inosine containing | -0.02 | 0.79 | 0.99 |
| <b>N-acetylglutamine</b>                             | Amino Acid             | Glutamate Metabolism                                 | 0.03  | 0.79 | 0.99 |
| <b>4-ethylphenyl sulfate</b>                         | Xenobiotics            | Benzoate Metabolism                                  | 0.06  | 0.80 | 0.99 |
| <b>isovalerate (C5)</b>                              | Amino Acid             | Leucine, Isoleucine and Valine Metabolism            | -0.02 | 0.80 | 0.99 |
| <b>pentadecanoate (15:0)</b>                         | Lipid                  | Long Chain Fatty Acid                                | -0.02 | 0.80 | 0.99 |
| <b>TL20:0 (arachidic acid)</b>                       | Lipid                  | Mole % Total Fatty Acid                              | -0.02 | 0.80 | 0.99 |
| <b>etiocholanolone glucuronide</b>                   | Lipid                  | Steroid                                              | -0.07 | 0.80 | 0.99 |

|                                                              |                        |                                                  |       |      |      |
|--------------------------------------------------------------|------------------------|--------------------------------------------------|-------|------|------|
| <b>thymol sulfate</b>                                        | Xenobiotics            | Food Component/Plant                             | -0.11 | 0.80 | 0.99 |
| <b>TL24:0 (lignoceric acid)</b>                              | Lipid                  | Mole % Total Fatty Acid                          | 0.03  | 0.80 | 0.99 |
| <b>campesterol</b>                                           | Lipid                  | Sterol                                           | -0.03 | 0.80 | 0.99 |
| <b>5alpha-pregnan-3(alpha or beta),20beta-diol disulfate</b> | Lipid                  | Steroid                                          | 0.12  | 0.80 | 0.99 |
| <b>o-cresol sulfate</b>                                      | Amino Acid             | Phenylalanine and Tyrosine Metabolism            | 0.14  | 0.80 | 0.99 |
| <b>2-linoleoylglycerol (2-monolinolein)</b>                  | Lipid                  | Monoacylglycerol                                 | -0.04 | 0.81 | 0.99 |
| <b>tyrosylglutamine</b>                                      | Peptide                | Dipeptide                                        | -0.04 | 0.81 | 0.99 |
| <b>succinylcarnitine (C4)</b>                                | Energy                 | TCA Cycle                                        | -0.02 | 0.81 | 0.99 |
| <b>N-acetyl-beta-alanine</b>                                 | Nucleotide             | Pyrimidine Metabolism, Uracil containing         | -0.02 | 0.81 | 0.99 |
| <b>1-methylurate</b>                                         | Xenobiotics            | Xanthine Metabolism                              | -0.06 | 0.81 | 0.99 |
| <b>glycerol 3-phosphate (G3P)</b>                            | Lipid                  | Glycerolipid Metabolism                          | -0.05 | 0.82 | 0.99 |
| <b>7-methylxanthine</b>                                      | Xenobiotics            | Xanthine Metabolism                              | -0.07 | 0.82 | 0.99 |
| <b>7-HOCA</b>                                                | Lipid                  | Sterol                                           | -0.02 | 0.82 | 0.99 |
| <b>trigonelline (N'-methylnicotinate)</b>                    | Cofactors and Vitamins | Nicotinate and Nicotinamide Metabolism           | -0.05 | 0.82 | 0.99 |
| <b>TL24:1n9 (nervonic acid)</b>                              | Lipid                  | Mole % Total Fatty Acid                          | 0.02  | 0.82 | 0.99 |
| <b>guanidinoacetate</b>                                      | Amino Acid             | Creatine Metabolism                              | 0.02  | 0.82 | 0.99 |
| <b>5-acetylamino-6-amino-3-methyluracil</b>                  | Xenobiotics            | Xanthine Metabolism                              | 0.09  | 0.83 | 0.99 |
| <b>maltose</b>                                               | Carbohydrate           | Glycogen Metabolism                              | 0.05  | 0.83 | 0.99 |
| <b>glucarate 1,4-lactone</b>                                 | Carbohydrate           | Disaccharides and Oligosaccharides               | 0.15  | 0.83 | 0.99 |
| <b>margarate (17:0)</b>                                      | Lipid                  | Long Chain Fatty Acid                            | 0.02  | 0.83 | 0.99 |
| <b>TL18:3n3 (a-linolenic acid)</b>                           | Lipid                  | Mole % Total Fatty Acid                          | -0.02 | 0.83 | 0.99 |
| <b>propionylcarnitine (C3)</b>                               | Lipid                  | Fatty Acid Metabolism (also BCAA Metabolism)     | -0.02 | 0.83 | 0.99 |
| <b>acetylcarnitine (C2)</b>                                  | Lipid                  | Fatty Acid Metabolism(Acyl Carnitine)            | 0.02  | 0.83 | 0.99 |
| <b>threonylphenylalanine</b>                                 | Peptide                | Dipeptide                                        | -0.08 | 0.83 | 0.99 |
| <b>1-docosapentaenoyl-GPC* (22:5n6)*</b>                     | Lipid                  | Lysolipid                                        | 0.06  | 0.83 | 0.99 |
| <b>ursodeoxycholate</b>                                      | Lipid                  | Secondary Bile Acid Metabolism                   | -0.08 | 0.84 | 0.99 |
| <b>2-hydroxybutyrate (AHB)</b>                               | Amino Acid             | Methionine, Cysteine, SAM and Taurine Metabolism | 0.02  | 0.84 | 0.99 |
| <b>palmitoleate (16:1n7)</b>                                 | Lipid                  | Long Chain Fatty Acid                            | 0.02  | 0.84 | 0.99 |
| <b>creatinine</b>                                            | Amino Acid             | Creatine Metabolism                              | 0.01  | 0.85 | 0.99 |
| <b>TL20:4n3 (eicosatetraoic acid)</b>                        | Lipid                  | Mole % Total Fatty Acid                          | 0.02  | 0.85 | 0.99 |
| <b>threitol</b>                                              | Carbohydrate           | Pentose Metabolism                               | -0.02 | 0.85 | 0.99 |
| <b>2-oleoylglycerol (18:1)</b>                               | Lipid                  | Monoacylglycerol                                 | 0.02  | 0.85 | 0.99 |
| <b>indole-3-carboxylic acid</b>                              | Amino Acid             | Tryptophan Metabolism                            | -0.01 | 0.85 | 0.99 |
| <b>TLdm16:0 (plasmalogen palmitic acid)</b>                  | Lipid                  | Mole % Total Fatty Acid                          | -0.01 | 0.86 | 0.99 |

|                                                            |              |                                                      |       |      |      |
|------------------------------------------------------------|--------------|------------------------------------------------------|-------|------|------|
| <b>histidine</b>                                           | Amino Acid   | Histidine Metabolism                                 | -0.02 | 0.86 | 0.99 |
| <b>glycerol</b>                                            | Lipid        | Glycerolipid Metabolism                              | 0.01  | 0.86 | 0.99 |
| <b>pyroglutamine*</b>                                      | Amino Acid   | Glutamate Metabolism                                 | -0.03 | 0.86 | 0.99 |
| <b>N-acetylthreonine</b>                                   | Amino Acid   | Glycine, Serine and Threonine Metabolism             | 0.02  | 0.86 | 0.99 |
| <b>pyroglutamylglycine</b>                                 | Peptide      | Dipeptide                                            | -0.04 | 0.87 | 0.99 |
| <b>N6-carbamoylthreonyladenosine</b>                       | Nucleotide   | Purine Metabolism, Adenine containing                | 0.01  | 0.87 | 0.99 |
| <b>myristoleoyl sphingomyelin*</b>                         | Lipid        | Sphingolipid Metabolism                              | 0.02  | 0.87 | 0.99 |
| <b>5-dodecenoate (12:1n7)</b>                              | Lipid        | Medium Chain Fatty Acid                              | -0.02 | 0.87 | 0.99 |
| <b>5alpha-androstan-3beta,17alpha-diol disulfate</b>       | Lipid        | Steroid                                              | 0.05  | 0.87 | 0.99 |
| <b>ribose</b>                                              | Carbohydrate | Pentose Metabolism                                   | 0.03  | 0.87 | 0.99 |
| <b>5alpha-androstan-3alpha,17beta-diol monosulfate (1)</b> | Lipid        | Steroid                                              | 0.06  | 0.87 | 0.99 |
| <b>gamma-glutamylhistidine</b>                             | Peptide      | Gamma-glutamyl Amino Acid                            | -0.04 | 0.87 | 0.99 |
| <b>N-delta-acetylornithine</b>                             | Amino Acid   | Urea cycle; Arginine and Proline Metabolism          | 0.02  | 0.87 | 0.99 |
| <b>vaccenate (18:1n7)</b>                                  | Lipid        | Long Chain Fatty Acid                                | 0.01  | 0.87 | 0.99 |
| <b>decanoylcarnitine (C10)</b>                             | Lipid        | Fatty Acid Metabolism(Acyl Carnitine)                | 0.01  | 0.87 | 0.99 |
| <b>N-acetylhistidine</b>                                   | Amino Acid   | Histidine Metabolism                                 | 0.03  | 0.88 | 0.99 |
| <b>17-methylstearate</b>                                   | Lipid        | Fatty Acid, Branched                                 | 0.02  | 0.88 | 0.99 |
| <b>16a-hydroxy DHEA 3-sulfate</b>                          | Lipid        | Steroid                                              | 0.03  | 0.88 | 0.99 |
| <b>erucate (22:1n9)</b>                                    | Lipid        | Long Chain Fatty Acid                                | 0.01  | 0.88 | 0.99 |
| <b>xylonate</b>                                            | Carbohydrate | Pentose Metabolism                                   | 0.03  | 0.88 | 0.99 |
| <b>1-linoleoyl-GPI* (18:2)*</b>                            | Lipid        | Lysolipid                                            | 0.01  | 0.88 | 0.99 |
| <b>palmitoyl-linoleoyl-glycerophosphoinositol (1)*</b>     | Lipid        | Lysolipid                                            | -0.03 | 0.88 | 0.99 |
| <b>phosphate</b>                                           | Energy       | Oxidative Phosphorylation                            | -0.01 | 0.88 | 0.99 |
| <b>cyclo(L-phe-L-pro)</b>                                  | Peptide      | Dipeptide                                            | 0.03  | 0.89 | 0.99 |
| <b>myristoleate (14:1n5)</b>                               | Lipid        | Long Chain Fatty Acid                                | -0.04 | 0.89 | 0.99 |
| <b>glycerophosphoethanolamine</b>                          | Lipid        | Phospholipid Metabolism                              | 0.02  | 0.89 | 0.99 |
| <b>kynurenine</b>                                          | Amino Acid   | Tryptophan Metabolism                                | 0.01  | 0.89 | 0.99 |
| <b>tartarate</b>                                           | Xenobiotics  | Food Component/Plant                                 | 0.04  | 0.89 | 0.99 |
| <b>beta-sitosterol</b>                                     | Lipid        | Sterol                                               | -0.02 | 0.90 | 0.99 |
| <b>linoleate (18:2n6)</b>                                  | Lipid        | Polyunsaturated Fatty Acid (n3 and n6)               | 0.01  | 0.90 | 0.99 |
| <b>glycolithocholate</b>                                   | Lipid        | Secondary Bile Acid Metabolism                       | -0.05 | 0.90 | 0.99 |
| <b>glycerate</b>                                           | Carbohydrate | Glycolysis, Gluconeogenesis, and Pyruvate Metabolism | 0.01  | 0.91 | 0.99 |
| <b>glutarate (pentanedioate)</b>                           | Amino Acid   | Lysine Metabolism                                    | 0.02  | 0.91 | 0.99 |
| <b>fumarate</b>                                            | Energy       | TCA Cycle                                            | -0.01 | 0.91 | 0.99 |



|                                                       |                        |                                             |        |      |      |
|-------------------------------------------------------|------------------------|---------------------------------------------|--------|------|------|
| <b>oleate (18:1n9)</b>                                | Lipid                  | Long Chain Fatty Acid                       | 0.01   | 0.91 | 0.99 |
| <b>epiandrosterone sulfate</b>                        | Lipid                  | Steroid                                     | 0.03   | 0.91 | 0.99 |
| <b>oleamide</b>                                       | Lipid                  | Fatty Acid, Amide                           | 0.02   | 0.91 | 0.99 |
| <b>carnitine</b>                                      | Lipid                  | Carnitine Metabolism                        | -0.004 | 0.92 | 0.99 |
| <b>2-pyrrolidinone</b>                                | Xenobiotics            | Chemical                                    | -0.02  | 0.92 | 0.99 |
| <b>2-keto-3-deoxy-gluconate</b>                       | Xenobiotics            | Food Component/Plant                        | 0.01   | 0.92 | 0.99 |
| <b>3-methoxycatechol sulfate (2)</b>                  | Xenobiotics            | Benzoate Metabolism                         | -0.03  | 0.92 | 0.99 |
| <b>phenylalanylglutamate</b>                          | Peptide                | Dipeptide                                   | 0.05   | 0.92 | 0.99 |
| <b>TL20:3n6 (di-homo-g-linoleic acid)</b>             | Lipid                  | Mole % Total Fatty Acid                     | -0.01  | 0.93 | 0.99 |
| <b>3-[3-(sulfooxy)phenyl]propanoic acid</b>           | Amino Acid             | Phenylalanine and Tyrosine Metabolism       | -0.04  | 0.93 | 0.99 |
| <b>N-methylpipecolate</b>                             | Xenobiotics            | Chemical                                    | -0.02  | 0.93 | 0.99 |
| <b>N-acetyllaiiin</b>                                 | Xenobiotics            | Food Component/Plant                        | 0.03   | 0.93 | 0.99 |
| <b>deoxycarnitine</b>                                 | Lipid                  | Carnitine Metabolism                        | -0.004 | 0.93 | 0.99 |
| <b>stearoyl-linoleoyl-glycerophosphocholine (1)*</b>  | Lipid                  | Lysolipid                                   | -0.01  | 0.93 | 0.99 |
| <b>HWESASXX*</b>                                      | Peptide                | Polypeptide                                 | -0.02  | 0.93 | 0.99 |
| <b>3-hydroxydecanoate</b>                             | Lipid                  | Fatty Acid, Monohydroxy                     | 0.01   | 0.93 | 0.99 |
| <b>1-linoleoyl-GPE (18:2)*</b>                        | Lipid                  | Lysolipid                                   | -0.01  | 0.94 | 0.99 |
| <b>2-aminophenol sulfate</b>                          | Xenobiotics            | Chemical                                    | -0.02  | 0.94 | 0.99 |
| <b>choline</b>                                        | Lipid                  | Phospholipid Metabolism                     | -0.004 | 0.94 | 0.99 |
| <b>gluconate</b>                                      | Xenobiotics            | Food Component/Plant                        | 0.01   | 0.94 | 0.99 |
| <b>betonidine</b>                                     | Xenobiotics            | Food Component/Plant                        | 0.04   | 0.94 | 0.99 |
| <b>aspartylleucine</b>                                | Peptide                | Dipeptide                                   | -0.01  | 0.94 | 0.99 |
| <b>l-urobilinogen</b>                                 | Cofactors and Vitamins | Hemoglobin and Porphyrin Metabolism         | 0.03   | 0.94 | 0.99 |
| <b>deoxycholate</b>                                   | Lipid                  | Secondary Bile Acid Metabolism              | -0.01  | 0.94 | 0.99 |
| <b>hydroxybutyrylcarnitine*</b>                       | Lipid                  | Fatty Acid Metabolism(Acyl Carnitine)       | -0.01  | 0.94 | 0.99 |
| <b>oleoyl-linoleoyl-glycerophosphocholine (2)*</b>    | Lipid                  | Lysolipid                                   | -0.01  | 0.94 | 0.99 |
| <b>hydroxyproline</b>                                 | Amino Acid             | Urea cycle; Arginine and Proline Metabolism | 0.01   | 0.94 | 0.99 |
| <b>TL18:4n3 (stearidonic acid)</b>                    | Lipid                  | Mole % Total Fatty Acid                     | 0.01   | 0.94 | 0.99 |
| <b>N-acetylkynurenine (2)</b>                         | Amino Acid             | Tryptophan Metabolism                       | 0.02   | 0.94 | 0.99 |
| <b>pyroglutamylvaline</b>                             | Peptide                | Dipeptide                                   | -0.01  | 0.94 | 0.99 |
| <b>cys-gly, oxidized</b>                              | Amino Acid             | Glutathione Metabolism                      | -0.01  | 0.95 | 0.99 |
| <b>pyrraline</b>                                      | Xenobiotics            | Food Component/Plant                        | 0.02   | 0.95 | 0.99 |
| <b>glycerophosphorylcholine (GPC)</b>                 | Lipid                  | Phospholipid Metabolism                     | 0.004  | 0.95 | 0.99 |
| <b>TL22:0 (behenic acid)</b>                          | Lipid                  | Mole % Total Fatty Acid                     | 0.01   | 0.95 | 0.99 |
| <b>palmitoyl-palmitoyl-glycerophosphocholine (2)*</b> | Lipid                  | Lysolipid                                   | 0.01   | 0.95 | 0.99 |

|                                                        |                        |                                                      |        |      |      |
|--------------------------------------------------------|------------------------|------------------------------------------------------|--------|------|------|
| <b>TLTL (Total Total Lipid)</b>                        | Lipid                  | Quantitative Total Fatty Acid                        | 0.005  | 0.95 | 0.99 |
| <b>pyridoxate</b>                                      | Cofactors and Vitamins | Vitamin B6 Metabolism                                | 0.01   | 0.95 | 0.99 |
| <b>linolenate (18:3n3 or 3n6)</b>                      | Lipid                  | Polyunsaturated Fatty Acid (n3 and n6)               | -0.01  | 0.96 | 0.99 |
| <b>2-aminoadipate</b>                                  | Amino Acid             | Lysine Metabolism                                    | -0.005 | 0.96 | 0.99 |
| <b>4-androsten-3alpha,17alpha-diol monosulfate (3)</b> | Lipid                  | Steroid                                              | -0.01  | 0.96 | 0.99 |
| <b>cystine</b>                                         | Amino Acid             | Methionine, Cysteine, SAM and Taurine Metabolism     | 0.003  | 0.96 | 0.99 |
| <b>taurodeoxycholate</b>                               | Lipid                  | Secondary Bile Acid Metabolism                       | 0.02   | 0.96 | 0.99 |
| <b>TLdm18:0 (plasmalogen stearic acid)</b>             | Lipid                  | Mole % Total Fatty Acid                              | -0.004 | 0.96 | 0.99 |
| <b>palmitoyl-oleoyl-glycerophosphocholine (1)*</b>     | Lipid                  | Lysolipid                                            | -0.004 | 0.96 | 0.99 |
| <b>TL16:0 (palmitic acid)</b>                          | Lipid                  | Mole % Total Fatty Acid                              | -0.001 | 0.96 | 0.99 |
| <b>scyllo-inositol</b>                                 | Lipid                  | Inositol Metabolism                                  | 0.01   | 0.96 | 0.99 |
| <b>2-hydroxyglutarate</b>                              | Lipid                  | Fatty Acid, Dicarboxylate                            | 0.004  | 0.96 | 0.99 |
| <b>leucylglycine</b>                                   | Peptide                | Dipeptide                                            | 0.01   | 0.97 | 0.99 |
| <b>hypoxanthine</b>                                    | Nucleotide             | Purine Metabolism, (Hypo)Xanthine/Inosine containing | 0.01   | 0.97 | 0.99 |
| <b>bilirubin</b>                                       | Cofactors and Vitamins | Hemoglobin and Porphyrin Metabolism                  | 0.01   | 0.97 | 0.99 |
| <b>sphingosine 1-phosphate</b>                         | Lipid                  | Sphingolipid Metabolism                              | -0.003 | 0.97 | 0.99 |
| <b>laurate (12:0)</b>                                  | Lipid                  | Medium Chain Fatty Acid                              | 0.004  | 0.97 | 0.99 |
| <b>ergothioneine</b>                                   | Xenobiotics            | Food Component/Plant                                 | 0.01   | 0.97 | 0.99 |
| <b>1-palmitoyl-GPI* (16:0)*</b>                        | Lipid                  | Lysolipid                                            | -0.01  | 0.97 | 0.99 |
| <b>N1-Methyl-2-pyridone-5-carboxamide</b>              | Cofactors and Vitamins | Nicotinate and Nicotinamide Metabolism               | 0.005  | 0.97 | 0.99 |
| <b>TL18:0 (stearic acid)</b>                           | Lipid                  | Mole % Total Fatty Acid                              | 0.001  | 0.97 | 0.99 |
| <b>methyl-4-hydroxybenzoate sulfate</b>                | Xenobiotics            | Benzoate Metabolism                                  | -0.01  | 0.97 | 0.99 |
| <b>5alpha-androstan-3alpha,17beta-diol disulfate</b>   | Lipid                  | Steroid                                              | -0.01  | 0.97 | 0.99 |
| <b>4-imidazoleacetate</b>                              | Amino Acid             | Histidine Metabolism                                 | -0.01  | 0.98 | 0.99 |
| <b>pipecolate</b>                                      | Amino Acid             | Lysine Metabolism                                    | -0.004 | 0.98 | 0.99 |
| <b>cinnamoylglycine</b>                                | Xenobiotics            | Food Component/Plant                                 | 0.01   | 0.98 | 0.99 |
| <b>2-hydroxypalmitate</b>                              | Lipid                  | Fatty Acid, Monohydroxy                              | 0.001  | 0.98 | 0.99 |
| <b>glycodeoxycholate</b>                               | Lipid                  | Secondary Bile Acid Metabolism                       | 0.01   | 0.98 | 0.99 |
| <b>3-methylxanthine</b>                                | Xenobiotics            | Xanthine Metabolism                                  | 0.01   | 0.98 | 0.99 |
| <b>vanillylmandelate (VMA)</b>                         | Amino Acid             | Phenylalanine and Tyrosine Metabolism                | -0.002 | 0.98 | 0.99 |
| <b>4-androsten-3beta,17beta-diol monosulfate (2)</b>   | Lipid                  | Steroid                                              | -0.005 | 0.98 | 0.99 |
| <b>gamma-glutamyltyrosine</b>                          | Peptide                | Gamma-glutamyl Amino Acid                            | -0.001 | 0.98 | 0.99 |

|                                                       |             |                                           |        |      |      |
|-------------------------------------------------------|-------------|-------------------------------------------|--------|------|------|
| <b>4-hydroxybenzoate</b>                              | Xenobiotics | Benzoate Metabolism                       | -0.01  | 0.98 | 0.99 |
| <b>palmitoyl-palmitoyl-glycerophosphocholine (1)*</b> | Lipid       | Lysolipid                                 | -0.002 | 0.99 | 1.00 |
| <b>3-(3-hydroxyphenyl)propionate</b>                  | Amino Acid  | Phenylalanine and Tyrosine Metabolism     | 0.003  | 0.99 | 1.00 |
| <b>3-methyl-2-oxovalerate</b>                         | Amino Acid  | Leucine, Isoleucine and Valine Metabolism | 0.0005 | 0.99 | 1.00 |
| <b>1-stearoyl-GPI (18:0)</b>                          | Lipid       | Lysolipid                                 | 0.0002 | 1.00 | 1.00 |
| <b>13-methylmyristic acid</b>                         | Lipid       | Fatty Acid, Branched                      | 0.0002 | 1.00 | 1.00 |
| <b>cortisone</b>                                      | Lipid       | Steroid                                   | 0.0001 | 1.00 | 1.00 |

\*Covariates: age, sex, diabetes, hypertension, BMI, and liver fibrosis stage

TCA = tricarboxylic acid cycle; GPE = Glycerophosphoethanolamine; GPC = Glycerophosphocholine; SAM = S-Adenosyl methionine

**Figure S1: Venn diagram showing number of patients meeting each definition of HFpEF and overlap between definitions**

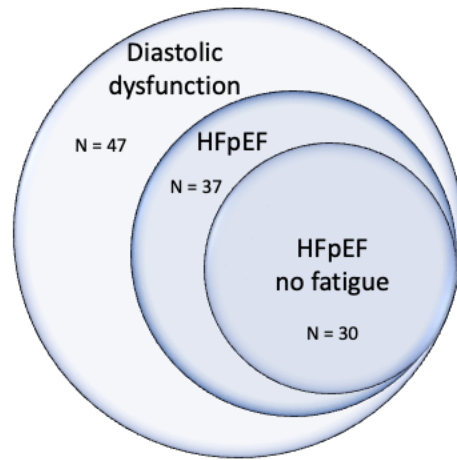

HFpEF = heart failure with preserved ejection fraction

Figure S2: Metabolite missingness

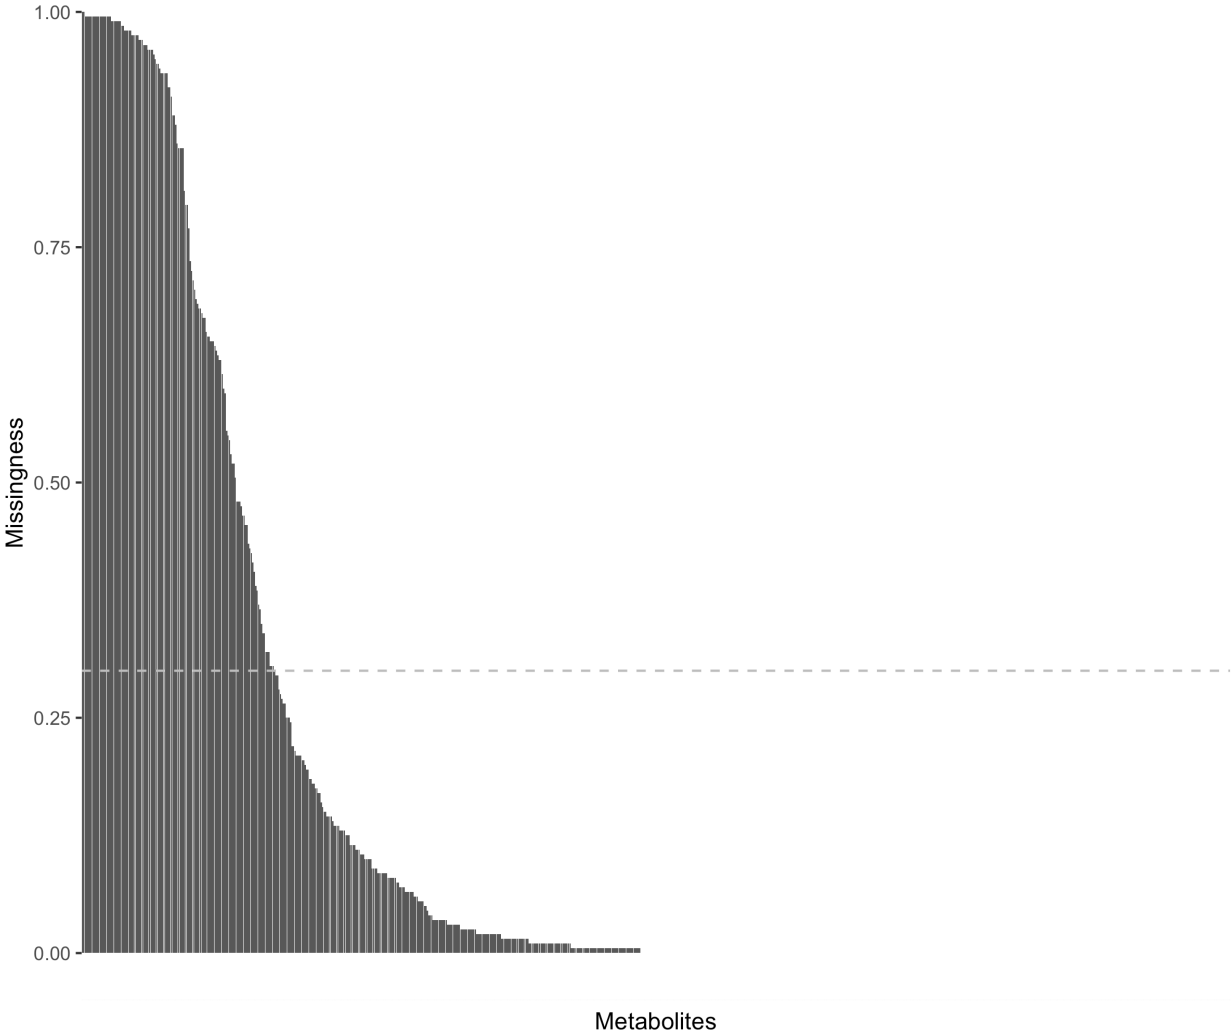

Figure S3: Volcano plot for HFpEF

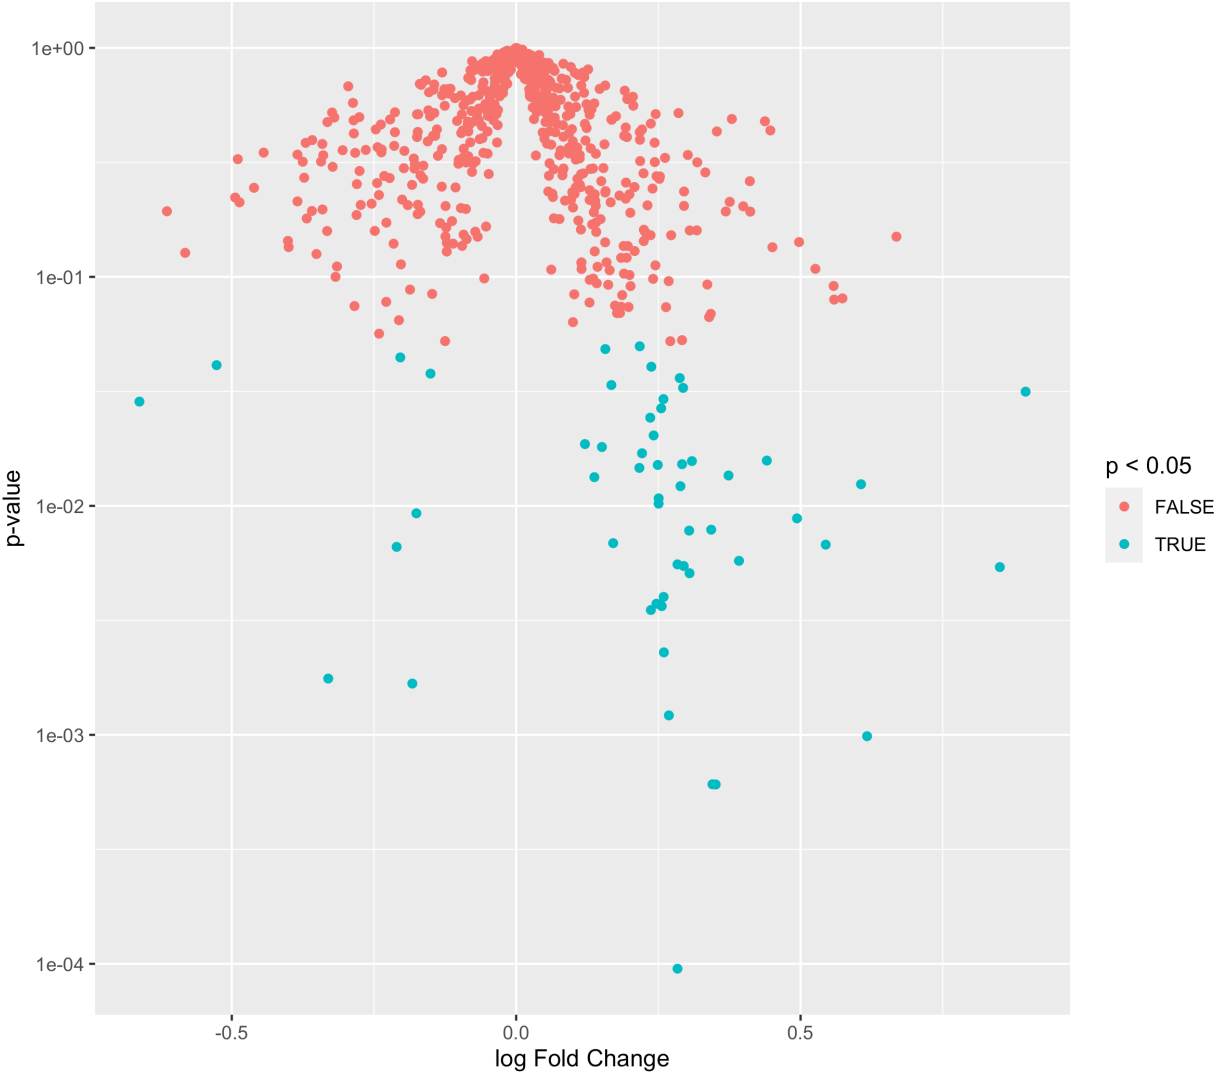

HFpEF = heart failure with preserved ejection fraction

Figure S4: Volcano plot for HFpEF-no fatigue

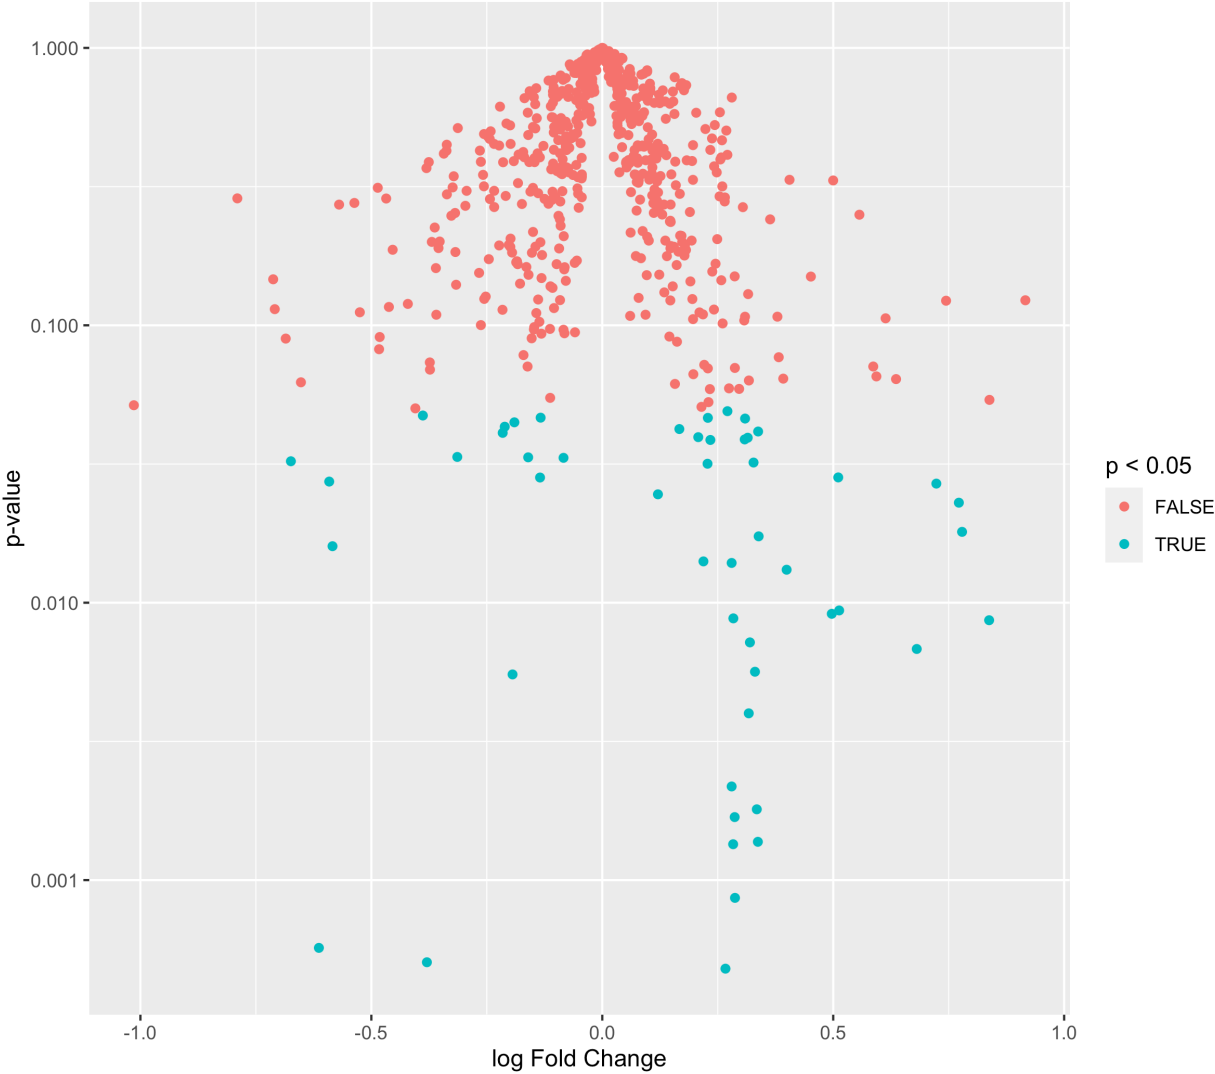

HFpEF = heart failure with preserved ejection fraction

Figure S5: Volcano plot for diastolic dysfunction

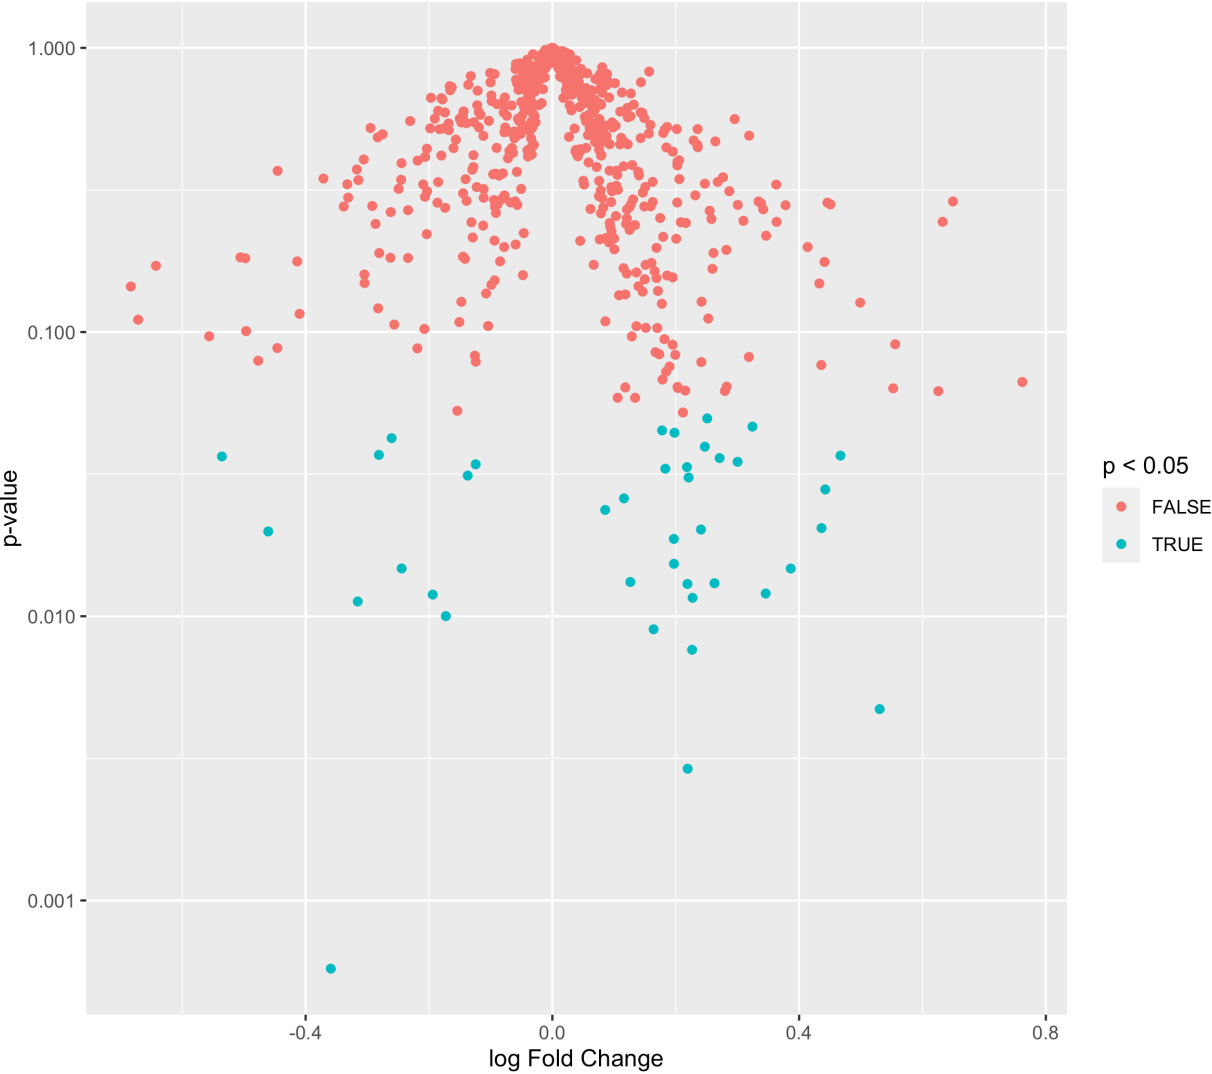

Supplement: JAH3-12-e029873-s001.pdf [file JAH3-12-e029873-s001.pdf]
